# Supplementary material
Source: PubMed Central journal article supplement (PMC1828534)
Supplement: iai_75_2_1005__1.pdf [file iai_75_2_1005__1.pdf]

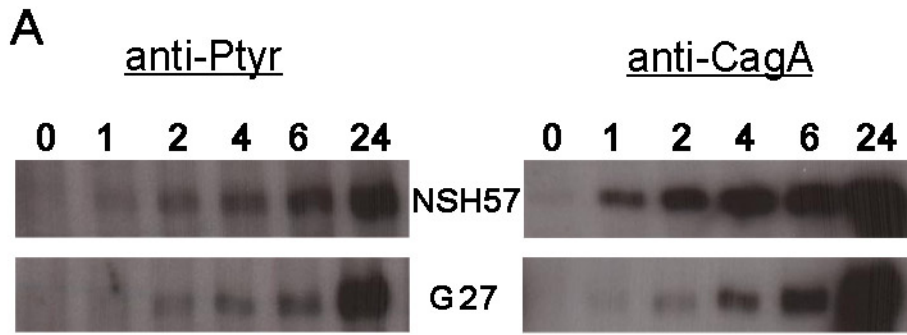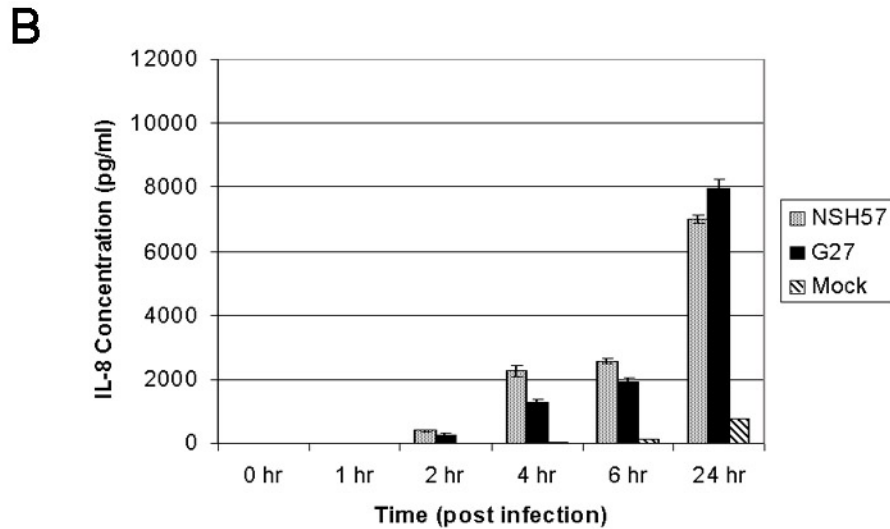

Figure S1. The mouse-adapted strain NSH57 (a variant of G27) retains a functional type IV secretion system as measured by the ability to translocate CagA into host cells and to induce IL-8 production during infection of AGS cells. A. Western blot data from infections of human AGS cells with mouse-adapted NSH57 and wild-type G27 from the time of infection (0 through 24 hours). CagA from whole-cell lysates is shown, first probed with a phosphotyrosine-specific antibody to identify CagA that has been translocated into the host cell cytoplasm, and then re-probed with a CagA-specific antibody that bound bacterial and AGS cell internal CagA. B. ELISA data from the same experiment showing IL-8 secretion over the time course of the infection. Data shown are representative of 2 biological replicates.

**Supplemental Table 1 Oligonucleotide Primers**

| Name             | Sequence                                       |
|------------------|------------------------------------------------|
| N                | ACTTTATTGTCATAGTTTAGATCTATTTTG                 |
| N3               | CTTTAATACGACGGGCAATTTGCACTTCAG                 |
| S                | ATAATCCTTAAAACTCCATTTCCACCCCT                  |
| S2               | CAGTTCCCAACTATTTTGTCC                          |
| C1               | GATATAGATTGAAAAGTGGAT                          |
| C2               | TTATCAGTGCGACAAACTGGG                          |
| hp0022-5         | TGCTTTATAGCCTTATTTTTGGCG                       |
| hp0022-3M        | ATCCACTTTTCAATCTATATCGTTGGTGTTTAAGACATTACCC    |
| hp0022-5M        | CCCAGTTTGTGCGACTGATAAGAAAACGCCAAGCAGCCCGCC     |
| hp0022-3         | CTCTTTTTTGTGTTTAAGCAG                          |
| hp0030-1         | TAAACACTTCCATGCTCACATGC                        |
| hp0030-2         | TGTCTTTTAAGGTTAAAGAGCG                         |
| hp0030-3         | ATCCACTTTTCAATCTATATCGATAGTCCCAAAGGTAGTCCGC    |
| hp0030-4         | CCCAGTTTGTGCGACTGATAACCGCCATAGAGCAAGCAGAGGGC   |
| ss2hp0137:5'     | GCGCATTAAAGAAGCCAGAGCC                         |
| hp0137-3M        | ATCCACTTTTCAATCTATATCCAAACAACCTTTCACGCATCGC    |
| hp0137-5M        | CCCAGTTTGTGCGACTGATAAGCTTGGGCATGATTGGGGCGG     |
| ss2hp0137:3'     | GCGACTTTTTGAGGCCCATGCACCCC                     |
| hp0368-5         | GATCATTGGATAGTTTAAAGG                          |
| hp0368-3M        | ATCCACTTTTCAATCTATATCAAGGACACACCGCTTTTTGTC     |
| hp0368-5M        | CCCAGTTTGTGCGACTGATAAGAGTGTGCGAAGACCAATTGC     |
| hp0368-3         | ATCTTAGACATCTTATCCTCC                          |
| hp0503-5         | GTGGGAAATCCCCCTATAACG                          |
| ss2hp0503:5'     | GTGGGAAATCCCCCTATAACGATAG                      |
| hp0503-3M        | ATCCACTTTTCAATCTATATCGCATAATCCATTCGCCCTCGC     |
| hp0503-5M        | CCCAGTTTGTGCGACTGATAAGATTGCGATACGACGCTATGC     |
| ss2hp0503:3'     | CAAACCTACAAGGGTGTCTTGAAC                       |
| ss2hp0529cag9:5' | CATTGTTCTAATTGGTTGAAAGC                        |
| hp0529-3M        | ATCCACTTTTCAATCTATATCCACTTGCCCACGCCGATCCCC     |
| hp0529-5M        | CCCAGTTTGTGCGACTGATAATTTGCTCTTTGGTGTTTTGGC     |
| ss2hp0529cag9:3' | TAAACATAGATCCACCAACTCTTCC                      |
| hp0538-5         | CGCACAAAAACAAAAATTGTGTTTGTGG                   |
| 0538-KO-3        | ATCCACTTTTCAATCTATATCCTAATTCTTTGTATTCACTCGG    |
| 0538-KO-4        | CCCAGTTTGTGCGACTGATAAAATAACTACCAAGATACTAC      |
| 0538-KO-4-2      | CCCAGTTTGTGCGACTGATAAGAACCCTTCTTATAGCTTCGTGCGC |
| hp0538-3         | AAAATAAAAATTTTCATCAAAGGAATC                    |
| hp0963-1         | ATATCCAAGGTTTAAAGAGAGG                         |
| hp0963-2         | AATTTGTTTTGTTTCTCGCTCC                         |
| hp0963-3         | ATCCACTTTTCAATCTATATCGTTTAAATACGAGCGATCAAATCG  |
| hp0963-4         | CCCAGTTTGTGCGACTGATAATTATGCTTCATAGACACGCCTGG   |
| hp1028-5         | CACATCATTGTTTGCATTGCGG                         |
| hp1028-3         | CCCTTACGATGAAAAAAGAGATTTGATCG                  |
| 1028-KO-3        | atccacttttcaatctatcGCTATGACAAATGGGGGTATG       |
| 1028-KO-4        | cccagtttgcgactgataaGCCATCCACATCAGAAATACC       |
| ss2hp1081:5'     | GGGTGTCAGTTTTTCAACAAAACGAC                     |
| hp1081-3M        | ATCCACTTTTCAATCTATATCTTTAAGCCTTTCTTTAATGGC     |
| hp1081-5M        | CCCAGTTTGTGCGACTGATAATGACCCAAAAGCCGTCATGCG     |
| ss2hp1081:3'     | GCGTTCAAACGCTTTTCTAAACCC                       |

**Supplemental Table 2 Strains**

| <b>Name</b> | <b>Description</b>                             | <b>Reference</b>                                                       |
|-------------|------------------------------------------------|------------------------------------------------------------------------|
| G27         |                                                | <b>Covacci et al.</b> 1993.Proc Natl Acad Sci USA<br><b>90:5791-5.</b> |
| SS1         |                                                | <b>Lee et al.</b> 1997.Gastroenterology <b>112:1386-1397.</b>          |
| 10700       | Human clinical isolate most related to SS1     | <b>Lee et al.</b> 1997.Gastroenterology <b>112:1386-1397.</b>          |
| NSH57       | Mouse adapted variant of G27                   | This study                                                             |
| NSH79       | Mouse and laboratory passaged clinical isolate | This study                                                             |
| MHH9        | NSH57, HP0022::Cat                             | This study                                                             |
| MHH13       | NSH79, HP0022::Cat                             | This study                                                             |
| NSH59       | NSH57, HP0030::Cat                             | This study                                                             |
| NSH61       | NSH79, HP0030::Cat                             | This study                                                             |
| MHH19       | NSH79, HP0137::Cat                             | This study                                                             |
| NSH49       | NSH57, HP0137::Cat                             | This study                                                             |
| MHH11       | NSH57, HP0368::Cat                             | This study                                                             |
| NSH48       | NSH79, HP0368::Cat                             | This study                                                             |
| MHH1        | NSH57, HP0503::Cat                             | This study                                                             |
| MHH8        | NSH79, HP0503::Cat                             | This study                                                             |
| MHH2        | NSH57, HP0529::Cat                             | This study                                                             |
| MHH4        | NSH79, HP0529::Cat                             | This study                                                             |
| NSH44       | NSH57, HP0538::Cat                             | This study                                                             |
| NSH45       | NSH79, HP0538::Cat                             | This study                                                             |
| NSH60       | NSH57, HP0963::Cat                             | This study                                                             |
| NSH62       | NSH79, HP0963::Cat                             | This study                                                             |
| NSH35       | NSH57, HP1028::Cat                             | This study                                                             |
| NSH36       | NSH79, HP1028::Cat                             | This study                                                             |
| MHH6        | NSH79, HP1081::Cat                             | This study                                                             |
| MHH7        | NSH57, HP1081::Cat                             | This study                                                             |

Supplemental Table 3

| Supplemental Table 3 Gene content of mouse adapted strains |         |                |                                                                                  |                                  |            |       |     |
|------------------------------------------------------------|---------|----------------|----------------------------------------------------------------------------------|----------------------------------|------------|-------|-----|
| TIGR                                                       | ASTRA   | Gene Name      | Gene Description                                                                 | 10700(SS1 premouse) <sup>a</sup> | G27/NSH 57 | NSH79 | SS1 |
| HP0001                                                     | JHP0001 | nusB           | TRANSCRIPTION TERMINATION                                                        | 1                                | 1          | 1     | 1   |
| HP0002                                                     | JHP0002 | ribE           | riboflavin synthase beta chain                                                   | 1                                | 1          | 1     | 1   |
| HP0004                                                     | JHP0004 | icfA           | carbonic anhydrase                                                               | 1                                | 1          | 1     | 1   |
| HP0005                                                     | JHP0005 | pyrF           | orotidine 5'-phosphate decarboxylase                                             | 1                                | 1          | 1     | 1   |
| HP0006                                                     | JHP0006 | panC           | pantoate-beta-alanine ligase , PANTOATE--BETA-ALANINE LIGASE                     | 1                                | 1          | 1     | 1   |
| HP0007                                                     | N/A     |                |                                                                                  | 1                                | 1          | 1     | 1   |
| HP0009                                                     | JHP0007 |                | putative Outer membrane protein                                                  | 1                                | 1          | 0     | 1   |
| HP0010                                                     | JHP0008 | groEL          | chaperone and heat shock protein , 60kDa chaperone                               | 1                                | 1          | 1     | 1   |
| HP0012                                                     | JHP0010 | dnaG           | DNA primase                                                                      | 1                                | 1          | 1     | 1   |
| HP0013                                                     | JHP0011 |                |                                                                                  | 1                                | 1          | 1     | 1   |
| HP0014                                                     | JHP0012 |                |                                                                                  | 1                                | 1          | 1     | 1   |
| HP0015                                                     | JHP0013 |                |                                                                                  | 1                                | 1          | 1     | 1   |
| HP0016                                                     | JHP0014 |                |                                                                                  | 1                                | 1          | 1     | 1   |
| HP0017                                                     | JHP0015 | virB4, virB4_1 | virB4 homolog , DNA transfer protein                                             | 1                                | 1          | 1     | 1   |
| HP0018                                                     | JHP0016 |                |                                                                                  | 1                                | 1          | 1     | 1   |
| HP0019                                                     | JHP0017 | cheV, cheV_1   | chemotaxis protein , putative chemotaxis protein                                 | 1                                | 1          | 1     | 1   |
| HP0020                                                     | JHP0018 | nspC           | carboxynorspermidine decarboxylase , putative carboxynorspermidine decarboxylase | 1                                | 1          | 1     | 1   |
| HP0021                                                     | JHP0019 |                |                                                                                  | 1                                | 1          | 1     | 1   |
| HP0022                                                     | JHP0020 |                | conserved hypothetical integral membrane protein                                 | 1                                | 1          | 1     | 1   |
| HP0023                                                     | N/A     |                |                                                                                  | 1                                | 1          | 1     | 1   |
| HP0025                                                     | JHP0021 | omp2           | outer membrane protein , putative Outer membrane protein                         | 0                                | 1          | 1     | 0   |
| HP0026                                                     | JHP0022 | gltA           | citrate synthase                                                                 | 1                                | 1          | 1     | 1   |
| HP0027                                                     | JHP0023 | icd            | isocitrate dehydrogenase                                                         | 1                                | 1          | 1     | 1   |
| HP0028                                                     | JHP0024 |                | conserved hypothetical secreted protein                                          | 1                                | 1          | 1     | 1   |

Supplemental Table 3

| TIGR   | ASTRA   | Gene Name       | Gene Description                                                                       | 10700(SS1 premouse) <sup>a</sup> | G27/NSH 57 | NSH79 | SS1 |
|--------|---------|-----------------|----------------------------------------------------------------------------------------|----------------------------------|------------|-------|-----|
| HP0029 | JHP0025 | bioD            | dethiobiotin synthetase                                                                | 1                                | 1          | 1     | 1   |
| HP0030 | JHP0026 |                 |                                                                                        | 1                                | 1          | 0     | 1   |
| HP0031 | JHP0027 |                 |                                                                                        | 1                                | 1          | 1     | 1   |
| HP0032 | JHP0028 |                 | conserved hypothetical protein                                                         | 1                                | 1          | 1     | 1   |
| HP0033 | JHP0029 | clpA            | ATP-dependent C1p protease , ATP-DEPENDENT PROTEASE,ATP-BINDING SUBUNIT                | 1                                | 1          | 1     | 1   |
| HP0034 | JHP0030 | panD            | aspartate 1-decarboxylase                                                              | 1                                | 1          | 1     | 1   |
| HP0035 | JHP0031 |                 | conserved hypothetical protein                                                         | 1                                | 1          | 1     | 1   |
| HP0036 | JHP0032 |                 |                                                                                        | 1                                | 1          | 1     | 1   |
| HP0037 | JHP0033 |                 | NADH-ubiquinone oxidoreductase subunit                                                 | 1                                | 1          | 1     | 1   |
| HP0038 | JHP0034 | comB1           | DNA transformation competency                                                          | 1                                | 1          | 1     | 1   |
| HP0039 | JHP0035 | comB2           | DNA transformation competency                                                          | 1                                | 1          | 1     | 1   |
| HP0040 | JHP0035 | comB2           | DNA transformation competency                                                          | 1                                | 1          | 1     | 1   |
| HP0041 | JHP0036 | comB3           | DNA transformation competency                                                          | 1                                | 1          | 1     | 1   |
| HP0042 | JHP0036 | comB3           | trbl protein, DNA transformation competency                                            | 1                                | 1          | 1     | 1   |
| HP0043 | JHP0037 | pmi, algA, manC | mannose-6-phosphate isomerase , phosphomannose isomerase/GDP-mannose pyrophosphorylase | 1                                | 1          | 1     | 1   |
| HP0044 | JHP0038 | rfbD, gmd       | GDP-D-mannose dehydratase                                                              | 1                                | 1          | 1     | 1   |
| HP0045 | JHP0039 | nolK            | nodulation protein , putative SUGAR NUCLEOTIDE BIOSYNTHESIS                            | 1                                | 1          | 1     | 1   |
| HP0047 | JHP0040 | hypE            | hydrogenase expression/formation protein                                               | 1                                | 1          | 1     | 1   |
| HP0048 | JHP0041 | hypF            | transcriptional regulator , putative TRANSCRIPTIONAL REGULATOR                         | 1                                | 1          | 1     | 1   |

Supplemental Table 3

| TIGR   | ASTRA   | Gene Name  | Gene Description                                                                                      | 10700(SS1 premouse) <sup>a</sup> | G27/NSH 57 | NSH79 | SS1 |
|--------|---------|------------|-------------------------------------------------------------------------------------------------------|----------------------------------|------------|-------|-----|
| HP0050 | JHP0043 | dpnA       | adenine specific DNA methyltransferase , putative TYPE II DNA MODIFICATION ENZYME (METHYLTRANSFERASE) | 1                                | 1          | 1     | 1   |
| HP0051 | N/A     | DDEM       | cytosine specific DNA methyltransferase                                                               | 1                                | 1          | 1     | 0   |
| HP0052 | N/A     |            |                                                                                                       | 0                                | 1          | 0     | 0   |
| HP0053 | N/A     |            |                                                                                                       | 0                                | 1          | 0     | 0   |
| HP0054 | N/A     |            | adenine/cytosine DNA methyltransferase                                                                | 0                                | 1          | 0     | 1   |
| HP0055 | JHP0047 | putP       | proline permease , sodium/proline symporter                                                           | 1                                | 1          | 1     | 1   |
| HP0057 | JHP0049 |            |                                                                                                       | 1                                | 1          | 1     | 1   |
| HP0058 | JHP0050 |            |                                                                                                       | 0                                | 1          | 1     | 0   |
| HP0059 | JHP0051 |            |                                                                                                       | 0                                | 1          | 1     | 1   |
| HP0060 | JHP0052 |            |                                                                                                       | 0                                | 1          | 1     | 1   |
| HP0062 | JHP0053 |            |                                                                                                       | 1                                | 0          | 0     | 1   |
| HP0063 | JHP0054 |            |                                                                                                       | 1                                | 1          | 1     | 1   |
| HP0066 | JHP0055 |            |                                                                                                       | 1                                | 1          | 1     | 1   |
| HP0067 | JHP0057 |            |                                                                                                       | 1                                | 0          | 0     | 1   |
| HP0068 | JHP0058 |            |                                                                                                       | 1                                | 1          | 1     | 1   |
| HP0066 | JHP0061 |            | conserved hypothetical ATP-binding protein                                                            | 1                                | 1          | 1     | 1   |
| HP0067 | JHP0062 | ureH       | urease accessory protein                                                                              | 1                                | 1          | 1     | 1   |
| HP0068 | JHP0063 | ureG       | urease accessory protein                                                                              | 1                                | 1          | 1     | 1   |
| HP0069 | JHP0064 | ureF       | urease accessory protein                                                                              | 1                                | 1          | 1     | 1   |
| HP0070 | JHP0065 | ureE       | urease accessory protein                                                                              | 1                                | 1          | 1     | 1   |
| HP0073 | JHP0068 | ureA       | urease alpha subunit (urea amidohydrolase), UREASE ALPHA SUBUNIT                                      | 1                                | 1          | 1     | 1   |
| HP0074 | JHP0069 | lspA       | lipoprotein signal peptidase                                                                          | 1                                | 1          | 1     | 1   |
| HP0075 | JHP0070 | ureC, glmM | urease protein , phosphoglucosamine mutase                                                            | 1                                | 1          | 1     | 1   |

Supplemental Table 3

| TIGR   | ASTRA   | Gene Name   | Gene Description                                                                                     | 10700(SS1 premouse) <sup>a</sup> | G27/NSH 57 | NSH79 | SS1 |
|--------|---------|-------------|------------------------------------------------------------------------------------------------------|----------------------------------|------------|-------|-----|
| HP0076 | JHP0071 | rps20, rpsT | ribosomal protein S20 , 30S RIBOSOMAL PROTEIN S20                                                    | 1                                | 1          | 1     | 1   |
| HP0077 | JHP0072 | prfA        | peptide chain release factor RF-1 , PEPTIDE CHAIN RELEASE FACTOR 1                                   | 1                                | 1          | 1     | 1   |
| HP0078 | JHP0073 |             | putative Outer membrane protein                                                                      | 1                                | 1          | 1     | 1   |
| HP0079 | JHP0073 | omp3        | outer membrane protein                                                                               | 0                                | 1          | 1     | 1   |
| HP0082 | JHP0075 | tlpC        | methyl-accepting chemotaxis transducer , methyl-accepting chemotaxis protein (MCP)                   | 1                                | 1          | 1     | 1   |
| HP0083 | JHP0076 | rps9, rpsI  | ribosomal protein S9 , 30S RIBOSOMAL PROTEIN S9                                                      | 1                                | 1          | 1     | 1   |
| HP0084 | JHP0077 | rpl13, rplM | ribosomal protein L13 , 50S RIBOSOMAL PROTEIN L13                                                    | 1                                | 1          | 1     | 1   |
| HP0086 | JHP0079 |             | conserved hypothetical protein                                                                       | 1                                | 1          | 1     | 1   |
| HP0087 | JHP0080 |             |                                                                                                      | 1                                | 1          | 1     | 1   |
| HP0088 | JHP0081 | rpoD        | RNA polymerase sigma-70 factor , RNA POLYMERASE SIGMA FACTOR (SIGMA-70)                              | 1                                | 1          | 1     | 1   |
| HP0089 | JHP0082 | pfs         | pfs protein                                                                                          | 1                                | 1          | 1     | 1   |
| HP0090 | JHP0083 | fabD        | malonyl coenzyme A-acyl carrier protein transacylase , MALONYL COA-ACYL CARRIER PROTEIN TRANSACYLASE | 1                                | 1          | 1     | 1   |
| HP0091 | JHP0084 | hsdR        | type II restriction enzyme R protein                                                                 | 1                                | 1          | 1     | 1   |
| HP0093 | JHP0086 |             | putative ALPHA(1,2)FUCOSYL TRANSFERASE                                                               | 1                                | 1          | 1     | 1   |
| HP0094 | JHP0086 |             | conserved hypothetical protein                                                                       | 1                                | 1          | 1     | 1   |
| HP0095 | JHP0087 |             |                                                                                                      | 1                                | 1          | 1     | 1   |

Supplemental Table 3

| TIGR   | ASTRA   | Gene Name    | Gene Description                                                                | 10700(SS1 premouse) <sup>a</sup> | G27/NSH 57 | NSH79 | SS1 |
|--------|---------|--------------|---------------------------------------------------------------------------------|----------------------------------|------------|-------|-----|
| HP0096 | JHP0088 |              | phosphoglycerate dehydrogenase, putative keto-acid dehydrogenase                | 1                                | 1          | 1     | 1   |
| HP0097 | JHP0089 |              |                                                                                 | 1                                | 1          | 1     | 1   |
| HP0098 | JHP0090 | thrC         | threonine synthase                                                              | 1                                | 1          | 1     | 1   |
| HP0099 | JHP0091 | tlpA         | methyl-accepting chemotaxis protein , methyl-accepting chemotaxis protein (MCP) | 1                                | 1          | 1     | 1   |
| HP0100 | JHP0092 |              | conserved hypothetical protein                                                  | 1                                | 1          | 1     | 1   |
| HP0101 | JHP0093 |              |                                                                                 | 1                                | 1          | 1     | 1   |
| HP0104 | JHP0096 | cpdB         | 2',3'-cyclic-nucleotide 2'-phosphodiesterase                                    | 1                                | 1          | 1     | 1   |
| HP0105 | JHP0097 |              | conserved hypothetical protein                                                  | 1                                | 1          | 1     | 1   |
| HP0106 | JHP0098 | metB         | cystathionine gamma-synthase , putative CYSTATHIONINE GAMMA-SYNTHASE            | 1                                | 1          | 1     | 1   |
| HP0107 | JHP0099 | cysK         | cysteine synthetase , CYSTEINE SYNTHASE                                         | 1                                | 1          | 1     | 1   |
| HP0109 | JHP0101 | dnaK         | chaperone and heat shock protein 70 , 70kDa chaperone                           | 1                                | 1          | 1     | 1   |
| HP0110 | JHP0102 | grpE         | co-chaperone and heat shock protein , 24kDa chaperone                           | 1                                | 1          | 1     | 1   |
| HP0111 | JHP0103 |              |                                                                                 | 1                                | 1          | 1     | 1   |
| HP0112 | JHP0104 |              |                                                                                 | 1                                | 1          | 1     | 1   |
| HP0113 | JHP0105 |              |                                                                                 | 1                                | 1          | 1     | 1   |
| HP0115 | JHP0107 | flaB         | flagellin B                                                                     | 1                                | 1          | 1     | 1   |
| HP0116 | JHP0108 | topA, topA_1 | DNA topoisomerase I                                                             | 1                                | 1          | 1     | 1   |
| HP0117 | JHP0109 |              | conserved hypothetical protein                                                  | 1                                | 1          | 1     | 1   |
| HP0118 | JHP0110 |              |                                                                                 | 1                                | 1          | 1     | 1   |
| HP0120 | N/A     |              |                                                                                 | 1                                | 1          | 1     | 1   |
| HP0121 | JHP0111 | ppsA         | phosphoenolpyruvate synthase                                                    | 1                                | 1          | 1     | 1   |
| HP0122 | JHP0112 |              |                                                                                 | 1                                | 1          | 1     | 1   |
| HP0123 | JHP0113 | thrS         | threonyl-tRNA synthetase                                                        | 1                                | 1          | 1     | 1   |
| HP0124 | JHP0114 | infC         | translation initiation factor IF-3                                              | 1                                | 1          | 1     | 1   |



Supplemental Table 3

| TIGR   | ASTRA   | Gene Name    | Gene Description                                                                                   | 10700(SS1 premouse) <sup>a</sup> | G27/NSH 57 | NSH79 | SS1 |
|--------|---------|--------------|----------------------------------------------------------------------------------------------------|----------------------------------|------------|-------|-----|
| HP0125 | JHP0115 | rpl35, rpml  | ribosomal protein L35 , 50S RIBOSOMAL PROTEIN L35                                                  | 1                                | 1          | 1     | 1   |
| HP0126 | JHP0116 | rpl20, rpIT  | ribosomal protein L20 , 50S RIBOSOMAL PROTEIN L20                                                  | 1                                | 1          | 1     | 1   |
| HP0127 | JHP0117 | omp4         | outer membrane protein , putative Outer membrane protein                                           | 1                                | 1          | 1     | 1   |
| HP0129 | JHP0118 |              |                                                                                                    | 1                                | 1          | 1     | 1   |
| HP0130 | JHP0119 |              |                                                                                                    | 1                                | 1          | 1     | 1   |
| HP0132 | JHP0120 | sdaA, sdaB   | L-serine deaminase , L-SERINE/L-THREONINEDEAMINASE                                                 | 1                                | 1          | 1     | 1   |
| HP0133 | JHP0121 | sdaC         | serine transporter , L-serine transporter, similar to E. coli nhaB                                 | 1                                | 1          | 1     | 1   |
| HP0134 | JHP0122 | dhs1, aroF   | 3-deoxy-D-arabino-heptulosonate 7-phosphate synthase , PHOSPHO-2-DEHYDRO-3-DEOXYHEPTONATE ALDOLASE | 1                                | 1          | 1     | 1   |
| HP0135 | JHP0123 |              |                                                                                                    | 1                                | 1          | 1     | 1   |
| HP0136 | JHP0124 | bcp          | bacterioferritin comigratory protein                                                               | 1                                | 1          | 1     | 1   |
| HP0137 | JHP0125 |              |                                                                                                    | 1                                | 1          | 1     | 1   |
| HP0138 | JHP0126 |              | conserved hypothetical iron-sulfur protein                                                         | 1                                | 1          | 1     | 1   |
| HP0139 | JHP0127 |              | conserved hypothetical secreted protein                                                            | 1                                | 1          | 1     | 1   |
| HP0140 | JHP0128 | lctP, lldP_1 | L-lactate permease                                                                                 | 1                                | 1          | 1     | 1   |
| HP0141 | JHP0129 | lctP, lldP_2 | L-lactate permease                                                                                 | 1                                | 1          | 1     | 1   |
| HP0142 | JHP0130 | mutY         | A/G-specific adenine glycosylase                                                                   | 1                                | 1          | 1     | 1   |
| HP0143 | JHP0131 |              |                                                                                                    | 1                                | 1          | 1     | 1   |
| HP0145 | JHP0133 | fixO         | cytochrome c oxidase, monoheme subunit, membrane-bound , Cytochrome oxidase (CBB3-TYPE)            | 1                                | 1          | 1     | 1   |

Supplemental Table 3

| TIGR   | ASTRA   | Gene Name  | Gene Description                                                                              | 10700(SS1 premouse) <sup>a</sup> | G27/NSH 57 | NSH79 | SS1 |
|--------|---------|------------|-----------------------------------------------------------------------------------------------|----------------------------------|------------|-------|-----|
| HP0146 | JHP0134 | CcoQ, fixQ | cbb3-type cytochrome c oxidase subunit Q , putative Cytochrome oxidase (CBB3-TYPE)            | 1                                | 1          | 1     | 1   |
| HP0147 | JHP0135 | fixP       | cytochrome c oxidase, diheme subunit, membrane-bound , Cytochrome oxidase (CBB3-TYPE)         | 1                                | 1          | 1     | 1   |
| HP0148 | JHP0136 |            |                                                                                               | 1                                | 1          | 1     | 1   |
| HP0149 | JHP0137 |            |                                                                                               | 1                                | 1          | 1     | 1   |
| HP0150 | JHP0138 |            |                                                                                               | 1                                | 1          | 1     | 1   |
| HP0151 | JHP0139 |            | conserved hypothetical membrane protein                                                       | 1                                | 1          | 1     | 1   |
| HP0152 | JHP0140 |            |                                                                                               | 1                                | 1          | 1     | 1   |
| HP0153 | JHP0141 | recA       | recombinase , RECA PROTEIN.                                                                   | 1                                | 1          | 1     | 1   |
| HP0154 | JHP0142 | eno        | enolase                                                                                       | 1                                | 1          | 1     | 1   |
| HP0155 | JHP0143 |            |                                                                                               | 1                                | 1          | 1     | 1   |
| HP0156 | JHP0144 |            |                                                                                               | 1                                | 1          | 1     | 1   |
| HP0157 | JHP0145 | aroK       | shikimic acid kinase I , SHIKIMATE KINASE I                                                   | 1                                | 1          | 1     | 1   |
| HP0158 | JHP0146 |            |                                                                                               | 1                                | 1          | 1     | 1   |
| HP0159 | JHP0147 | rfaJ       | lipopolysaccharide 1,2-glucosyltransferase , putative lipopolysaccharide biosynthesis protein | 1                                | 1          | 1     | 1   |
| HP0160 | JHP0148 |            | conserved hypothetical secreted protein                                                       | 1                                | 1          | 1     | 1   |
| HP0161 | N/A     |            |                                                                                               | 1                                | 1          | 0     | 1   |
| HP0162 | JHP0149 |            | conserved hypothetical protein                                                                | 1                                | 1          | 1     | 1   |
| HP0163 | JHP0150 | hemB       | delta-aminolevulinic acid dehydratase                                                         | 1                                | 1          | 1     | 1   |
| HP0164 | JHP0151 |            | signal-transducing protein, histidine kinase                                                  | 1                                | 1          | 1     | 1   |
| HP0165 | JHP0151 |            | putative histidine kinase sensor protein                                                      | 1                                | 1          | 1     | 1   |

Supplemental Table 3

| TIGR   | ASTRA   | Gene Name | Gene Description                                                          | 10700(SS1 premouse) <sup>a</sup> | G27/NSH 57 | NSH79 | SS1 |
|--------|---------|-----------|---------------------------------------------------------------------------|----------------------------------|------------|-------|-----|
| HP0166 | JHP0152 | ompR      | response regulator , putative TRANSCRIPTIONAL REGULATOR                   | 1                                | 1          | 1     | 1   |
| HP0167 | JHP0153 |           |                                                                           | 1                                | 1          | 1     | 1   |
| HP0168 | JHP0154 |           |                                                                           | 1                                | 1          | 1     | 1   |
| HP0169 | JHP0155 | prtC      | collagenase , putative PROTEASE                                           | 1                                | 1          | 1     | 1   |
| HP0170 | JHP0156 |           |                                                                           | 1                                | 1          | 1     | 1   |
| HP0171 | JHP0157 | prfB      | peptide chain release factor RF-2 , PEPTIDE CHAIN RELEASE FACTOR 2 (RF-2) | 1                                | 1          | 1     | 1   |
| HP0172 | JHP0158 | moeA      | molybdopterin biosynthesis protein                                        | 1                                | 1          | 1     | 0   |
| HP0173 | JHP0159 | fliR      | flagellar biosynthetic protein , FLAGELLAR BIOSYNTHESIS PROTEIN           | 1                                | 1          | 1     | 1   |
| HP0174 | JHP0160 |           |                                                                           | 1                                | 1          | 1     | 1   |
| HP0175 | JHP0161 |           | cell binding factor 2, putative PEPTIDYL-PROLYL CIS-TRANS ISOMERASE       | 1                                | 1          | 1     | 1   |
| HP0176 | JHP0162 | tsr, fba  | fructose-bisphosphate aldolase                                            | 1                                | 1          | 1     | 1   |
| HP0177 | JHP0163 | efp       | translation elongation factor EF-P , ELONGATION FACTOR P (EF-P)           | 1                                | 1          | 1     | 1   |
| HP0178 | JHP0166 | neuB      | spore coat polysaccharide biosynthesis protein E, sialic acid synthase    | 1                                | 1          | 1     | 1   |
| HP0179 | JHP0167 |           | ABC transporter, ATP-binding protein                                      | 1                                | 1          | 1     | 1   |
| HP0181 | JHP0169 |           |                                                                           | 1                                | 1          | 1     | 1   |
| HP0182 | JHP0170 | lysS      | lysyl-tRNA synthetase                                                     | 1                                | 1          | 1     | 1   |
| HP0183 | JHP0171 | glyA      | serine hydroxymethyltransferase                                           | 1                                | 1          | 1     | 1   |
| HP0184 | JHP0172 |           |                                                                           | 1                                | 1          | 1     | 1   |
| HP0185 | JHP0173 |           |                                                                           | 1                                | 1          | 1     | 1   |
| HP0186 | JHP0174 |           |                                                                           | 1                                | 1          | 1     | 1   |
| HP0187 | JHP0174 |           |                                                                           | 1                                | 1          | 1     | 1   |

Supplemental Table 3

| TIGR   | ASTRA   | Gene Name  | Gene Description                                                                               | 10700(SS1 premouse) <sup>a</sup> | G27/NSH 57 | NSH79 | SS1 |
|--------|---------|------------|------------------------------------------------------------------------------------------------|----------------------------------|------------|-------|-----|
| HP0189 | JHP0175 |            | conserved hypothetical integral membrane protein                                               | 1                                | 1          | 1     | 1   |
| HP0190 | JHP0176 |            | conserved hypothetical secreted protein, putative cardiolipin synthase                         | 1                                | 1          | 1     | 1   |
| HP0191 | JHP0177 | frdB       | fumarate reductase, iron-sulfur subunit , Fumarate reductase                                   | 1                                | 1          | 1     | 1   |
| HP0192 | JHP0178 | frdA       | fumarate reductase, flavoprotein subunit , Fumarate reductase                                  | 1                                | 1          | 1     | 1   |
| HP0193 | JHP0179 | frdC       | fumarate reductase, cytochrome b subunit , Fumarate reductase                                  | 1                                | 1          | 1     | 1   |
| HP0194 | JHP0180 | tpi        | triosephosphate isomerase , TRIOSE PHOPHATE ISOMERASE                                          | 1                                | 1          | 1     | 1   |
| HP0195 | JHP0181 | fabI       | enoyl-(acyl-carrier-protein) reductase (NADH) , ENOYL-ACYL CARRIER PROTEIN REDUCTASE           | 1                                | 1          | 1     | 1   |
| HP0196 | JHP0182 | lpxD       | UDP-3-O-(3-hydroxymyristoyl) glucosamine N-acyltransferase , UDP-3-O-[3-hydroxymyristoyl       | 1                                | 1          | 1     | 1   |
| HP0197 | JHP0183 | metX, metK | S-adenosylmethionine synthetase 2 , S-adenosylmethionine synthetase                            | 1                                | 1          | 1     | 1   |
| HP0198 | JHP0184 | ndk        | nucleoside diphosphate kinase                                                                  | 1                                | 1          | 1     | 1   |
| HP0199 | JHP0185 |            |                                                                                                | 1                                | 1          | 1     | 1   |
| HP0201 | JHP0187 | plsX       | fatty acid/phospholipid synthesis protein , putative FATTY ACID/PHOSPHOLIPID SYNTHESIS PROTEIN | 1                                | 1          | 1     | 1   |

Supplemental Table 3

| TIGR   | ASTRA   | Gene Name | Gene Description                                                                         | 10700(SS1 premouse) <sup>a</sup> | G27/NSH 57 | NSH79 | SS1 |
|--------|---------|-----------|------------------------------------------------------------------------------------------|----------------------------------|------------|-------|-----|
| HP0202 | JHP0188 | fabH      | beta-ketoacyl-acyl carrier protein synthase III , BETA-KETOACYL-ACP SYNTHASE III         | 1                                | 1          | 1     | 1   |
| HP0203 | JHP0189 |           |                                                                                          | 1                                | 1          | 1     | 1   |
| HP0206 | JHP0192 |           |                                                                                          | 1                                | 1          | 1     | 1   |
| HP0207 | JHP0193 | mpr       | ATP-binding protein                                                                      | 1                                | 1          | 1     | 1   |
| HP0208 | JHP0194 |           | putative lipopolysaccharide biosynthesis protein                                         | 1                                | 1          | 1     | 1   |
| HP0210 | JHP0196 | htpG      | chaperone and heat shock protein C62.5 , 90kDa chaperone                                 | 1                                | 1          | 1     | 1   |
| HP0212 | JHP0198 | dapE      | succinyl-diaminopimelate desuccinylase                                                   | 1                                | 1          | 1     | 1   |
| HP0213 | JHP0199 | gidA      | glucose inhibited division protein , GLUCOSE INHIBITED DIVISION PROTEIN A                | 1                                | 1          | 1     | 1   |
| HP0214 | JHP0200 | huNaDC-1  | sodium-dependent transporter , putative transporter                                      | 1                                | 1          | 1     | 1   |
| HP0215 | JHP0201 | cdsA      | CDP-diglyceride synthetase , CDP-DIACYLGLYCEROL SYNTHASE                                 | 1                                | 1          | 1     | 1   |
| HP0216 | JHP0202 |           | conserved hypothetical protein                                                           | 1                                | 1          | 1     | 1   |
| HP0217 | JHP0203 |           |                                                                                          | 1                                | 0          | 1     | 1   |
| HP0218 | JHP0204 |           |                                                                                          | 1                                | 1          | 1     | 1   |
| HP0219 | JHP0205 |           |                                                                                          | 1                                | 1          | 1     | 1   |
| HP0220 | JHP0206 | nifS      | synthesis of [Fe-S] cluster , putative AMINOTRANSFERASE                                  | 1                                | 1          | 1     | 1   |
| HP0222 | JHP0208 |           |                                                                                          | 1                                | 1          | 1     | 1   |
| HP0223 | JHP0209 | sms, radA | ATP-dependent protease , DNA REPAIR PROTEIN                                              | 1                                | 1          | 1     | 1   |
| HP0224 | JHP0210 | msrA      | peptide methionine sulfoxide reductase , putative PEPTIDE METHIONINE SULFOXIDE REDUCTASE | 1                                | 1          | 1     | 1   |

Supplemental Table 3

| TIGR   | ASTRA   | Gene Name  | Gene Description                                                                  | 10700(SS1 premouse) <sup>a</sup> | G27/NSH 57 | NSH79 | SS1 |
|--------|---------|------------|-----------------------------------------------------------------------------------|----------------------------------|------------|-------|-----|
| HP0226 | JHP0211 |            | conserved hypothetical integral membrane protein                                  | 1                                | 1          | 1     | 1   |
| HP0227 | JHP0212 | omp5       | outer membrane protein , putative Outer membrane protein                          | 1                                | 1          | 0     | 1   |
| HP0229 | JHP0214 | omp6, hopA | outer membrane protein , Outer membrane protein/porin                             | 1                                | 1          | 1     | 1   |
| HP0231 | JHP0216 |            |                                                                                   | 1                                | 1          | 1     | 1   |
| HP0232 | JHP0217 |            | secreted protein involved in flagellar motility, motility protein                 | 1                                | 1          | 1     | 1   |
| HP0233 | JHP0218 |            | conserved hypothetical protein                                                    | 1                                | 1          | 1     | 1   |
| HP0234 | JHP0219 |            | conserved hypothetical integral membrane protein                                  | 1                                | 1          | 1     | 1   |
| HP0235 | JHP0220 |            | conserved hypothetical secreted protein                                           | 1                                | 1          | 1     | 1   |
| HP0236 | JHP0221 |            |                                                                                   | 1                                | 1          | 1     | 1   |
| HP0237 | JHP0222 | hemC       | porphobilinogen deaminase                                                         | 1                                | 1          | 1     | 1   |
| HP0238 | JHP0223 | proS       | prolyl-tRNA synthetase                                                            | 1                                | 1          | 1     | 1   |
| HP0239 | JHP0224 | hemA       | glutamyl-tRNA reductase , GLUTAMYL TRNA REDUCTASE                                 | 1                                | 1          | 1     | 1   |
| HP0240 | JHP0225 | ispB       | octaprenyl-diphosphate synthase , putative OCTAPRENYL-DIPHOSPHATE SYNTHASE        | 1                                | 1          | 1     | 1   |
| HP0241 | JHP0226 |            |                                                                                   | 1                                | 1          | 1     | 1   |
| HP0242 | JHP0227 |            |                                                                                   | 1                                | 1          | 1     | 1   |
| HP0243 | JHP0228 | napA       | neutrophil activating protein (bacterioferritin), NEUTROPHIL-ACTIVATING PROTEIN A | 1                                | 1          | 1     | 1   |

Supplemental Table 3

| TIGR   | ASTRA   | Gene Name | Gene Description                                                                              | 10700(SS1 premouse) <sup>a</sup> | G27/NSH 57 | NSH79 | SS1 |
|--------|---------|-----------|-----------------------------------------------------------------------------------------------|----------------------------------|------------|-------|-----|
| HP0244 | JHP0229 | atoS      | signal-transducing protein, histidine kinase , putative histidine kinase sensor protein       | 1                                | 1          | 1     | 1   |
| HP0246 | JHP0231 | flgl      | flagellar basal-body P-ring protein , FLAGELLAR P-RING PROTEIN                                | 1                                | 1          | 1     | 1   |
| HP0247 | JHP0232 | deaD      | ATP-dependent RNA helicase, DEAD-box family , ATP-DEPENDENT RNA HELICASE DEAD                 | 1                                | 1          | 1     | 1   |
| HP0248 | JHP0233 |           | conserved hypothetical protein                                                                | 1                                | 1          | 1     | 1   |
| HP0249 | JHP0234 |           |                                                                                               | 1                                | 1          | 1     | 1   |
| HP0251 | JHP0236 | oppC      | oligopeptide ABC transporter, permease protein , ABC transporter, permease                    | 1                                | 1          | 1     | 1   |
| HP0254 | JHP0238 | omp8      | outer membrane protein                                                                        | 1                                | 1          | 1     | 1   |
| HP0255 | JHP0239 | purA      | adenylosuccinate synthetase                                                                   | 1                                | 1          | 1     | 1   |
| HP0256 | JHP0240 |           |                                                                                               | 1                                | 1          | 1     | 1   |
| HP0257 | JHP0241 |           | conserved hypothetical secreted protein                                                       | 1                                | 1          | 1     | 1   |
| HP0258 | JHP0242 |           | conserved hypothetical integral membrane protein                                              | 1                                | 1          | 1     | 1   |
| HP0260 | JHP0244 | mod       | adenine specific DNA methyltransferase , TYPE II DNA MODIFICATION ENZYME (METHYLTRANSFER ASE) | 1                                | 1          | 1     | 1   |
| HP0261 | JHP0245 |           |                                                                                               | 1                                | 1          | 0     | 1   |
| HP0263 | JHP0248 | hpaim     | adenine specific DNA methyltransferase , TYPE II DNA MODIFICATION ENZYME (METHYLTRANSFER ASE) | 1                                | 1          | 1     | 1   |

Supplemental Table 3

| TIGR   | ASTRA   | Gene Name    | Gene Description                                                                                     | 10700(SS1 premouse) <sup>a</sup> | G27/NSH 57 | NSH79 | SS1 |
|--------|---------|--------------|------------------------------------------------------------------------------------------------------|----------------------------------|------------|-------|-----|
| HP0264 | JHP0249 | clpB         | ATP-dependent protease binding subunit , HEAT SHOCK PROTEIN                                          | 1                                | 1          | 1     | 1   |
| HP0265 | JHP0250 | ccdA         | cytochrome c biogenesis protein , putative CYTOCHROME C-TYPE BIOGENESIS PROTEIN                      | 1                                | 1          | 1     | 1   |
| HP0266 | JHP0251 | pyrC, pyrC_1 | dihydroorotase                                                                                       | 1                                | 1          | 1     | 1   |
| HP0267 | JHP0252 | orf1         | chlorohydrolase                                                                                      | 1                                | 1          | 1     | 1   |
| HP0268 | JHP0253 |              |                                                                                                      | 1                                | 1          | 1     | 1   |
| HP0270 | JHP0255 |              |                                                                                                      | 1                                | 1          | 1     | 1   |
| HP0271 | JHP0256 |              |                                                                                                      | 1                                | 1          | 1     | 1   |
| HP0272 | JHP0257 |              |                                                                                                      | 1                                | 1          | 1     | 1   |
| HP0274 | JHP0259 |              | conserved hypothetical protein                                                                       | 1                                | 1          | 1     | 1   |
| HP0275 | JHP0260 | addB         | ATP-dependent nuclease                                                                               | 1                                | 1          | 1     | 1   |
| HP0276 | JHP0261 |              |                                                                                                      | 1                                | 1          | 1     | 1   |
| HP0278 | JHP0263 | gppA         | guanosine pentaphosphate phosphohydrolase , GUANOSINE-5'-TRIPHOSPHATE,3'-DIPHOSPHATE PYROPHOSPHATASE | 1                                | 1          | 1     | 1   |
| HP0279 | JHP0264 | rfaC, waaC   | lipopolysaccharide heptosyltransferase-1                                                             | 1                                | 1          | 1     | 1   |
| HP0280 | JHP0265 | ibpB, waaM   | heat shock protein B , putative LIPID A BIOSYNTHESIS ACYLTRANSFERASE                                 | 1                                | 1          | 1     | 1   |
| HP0281 | JHP0266 | tgt          | tRNA-guanine transglycosylase , QUEUINE TRNA-RIBOSYLTRANSFERASE                                      | 1                                | 1          | 1     | 1   |
| HP0282 | JHP0267 |              |                                                                                                      | 1                                | 1          | 1     | 1   |
| HP0283 | JHP0268 | aroB         | 3-dehydroquinate synthase                                                                            | 1                                | 1          | 1     | 1   |
| HP0284 | JHP0269 |              | conserved hypothetical integral membrane protein                                                     | 1                                | 1          | 1     | 1   |
| HP0285 | JHP0270 |              | conserved hypothetical protein                                                                       | 1                                | 1          | 1     | 1   |



Supplemental Table 3

| TIGR   | ASTRA   | Gene Name       | Gene Description                                                                                                                                     | 10700(SS1 premouse) <sup>a</sup> | G27/NSH 57 | NSH79 | SS1 |
|--------|---------|-----------------|------------------------------------------------------------------------------------------------------------------------------------------------------|----------------------------------|------------|-------|-----|
| HP0286 | JHP0271 | ftsH,<br>ftsH_1 | cell division protein ,<br>ATP-DEPENDENT<br>ZINC<br>METALLOPEPTIDASE                                                                                 | 1                                | 1          | 1     | 1   |
| HP0288 | JHP0273 |                 |                                                                                                                                                      | 1                                | 1          | 1     | 1   |
| HP0290 | JHP0275 | lysA            | diaminopimelate<br>decarboxylase (dap<br>decarboxylase) ,<br>DIAMINOPIMELATE<br>DECARBOXYLASE                                                        | 1                                | 1          | 1     | 1   |
| HP0291 | JHP0276 |                 |                                                                                                                                                      | 1                                | 1          | 1     | 1   |
| HP0292 | JHP0277 |                 |                                                                                                                                                      | 1                                | 1          | 1     | 1   |
| HP0293 | JHP0278 | pabB            | para-aminobenzoate<br>synthetase , P-<br>AMINO BENZOATE<br>SYNTHETASE                                                                                | 1                                | 1          | 1     | 1   |
| HP0294 | JHP0279 | aimE,<br>amiE   | aliphatic amidase                                                                                                                                    | 1                                | 1          | 1     | 1   |
| HP0295 | JHP0280 | fla, flgL       | flagellin B homolog ,<br>putative FLAGELLAR-<br>HOOK ASSOCIATED<br>PROTEIN 3 (HAP3)                                                                  | 1                                | 1          | 1     | 1   |
| HP0296 | JHP0281 | rpl21, rplU     | ribosomal protein L21 ,<br>50S RIBOSOMAL<br>PROTEIN L21                                                                                              | 1                                | 1          | 1     | 1   |
| HP0297 | JHP0282 | rpl27,<br>rpmA  | ribosomal protein L27 ,<br>50S RIBOSOMAL<br>PROTEIN L27                                                                                              | 1                                | 1          | 1     | 1   |
| HP0299 | JHP0284 | dppB            | dipeptide ABC<br>transporter, permease<br>protein , DIPEPTIDE<br>TRANSPORT<br>SYSTEM PERMEASE<br>PROTEIN                                             | 1                                | 1          | 1     | 1   |
| HP0300 | JHP0285 | dppC            | dipeptide ABC<br>transporter, permease<br>protein                                                                                                    | 1                                | 1          | 1     | 1   |
| HP0301 | JHP0286 | dppD            | dipeptide ABC<br>transporter, ATP-<br>binding protein ,<br>DIPEPTIDE<br>TRANSPORT<br>SYSTEM DIPEPTIDE<br>TRANSPORT<br>SYSTEM ATP-<br>BINDING PROTEIN | 1                                | 1          | 1     | 1   |

Supplemental Table 3

| TIGR   | ASTRA   | Gene Name | Gene Description                                                                                           | 10700(SS1 premouse) <sup>a</sup> | G27/NSH 57 | NSH79 | SS1 |
|--------|---------|-----------|------------------------------------------------------------------------------------------------------------|----------------------------------|------------|-------|-----|
| HP0302 | JHP0287 | dppF      | dipeptide ABC transporter, ATP-binding protein ,<br>DIPEPTIDE TRANSPORT SYSTEM ATP-BINDING PROTEIN         | 1                                | 1          | 1     | 1   |
| HP0303 | JHP0288 | obg       | GTP-binding protein                                                                                        | 1                                | 1          | 1     | 1   |
| HP0304 | JHP0289 |           |                                                                                                            | 1                                | 1          | 1     | 1   |
| HP0307 | JHP0292 |           |                                                                                                            | 1                                | 1          | 1     | 1   |
| HP0308 | JHP0293 |           |                                                                                                            | 1                                | 1          | 1     | 1   |
| HP0309 | JHP0294 |           | conserved hypothetical protein                                                                             | 1                                | 1          | 1     | 1   |
| HP0310 | JHP0295 |           | conserved hypothetical protein                                                                             | 1                                | 1          | 1     | 1   |
| HP0311 | JHP0296 |           |                                                                                                            | 1                                | 1          | 1     | 1   |
| HP0312 | JHP0297 |           | conserved hypothetical ATP-binding protein                                                                 | 1                                | 1          | 1     | 1   |
| HP0313 | JHP0298 | narK      | nitrite extrusion protein                                                                                  | 1                                | 1          | 1     | 1   |
| HP0315 | N/A     | vapD      | virulence associated protein D                                                                             | 1                                | 1          | 0     | 0   |
| HP0317 | N/A     | omp9      | outer membrane protein                                                                                     | 0                                | 1          | 0     | 1   |
| HP0318 | JHP0301 |           | conserved hypothetical protein                                                                             | 1                                | 1          | 1     | 1   |
| HP0319 | JHP0302 | argS      | arginyl-tRNA synthetase                                                                                    | 1                                | 1          | 1     | 1   |
| HP0321 | JHP0304 | gmk       | 5'-guanylate kinase ,<br>GUANYLATE KINASE                                                                  | 1                                | 1          | 1     | 1   |
| HP0322 | JHP0305 |           | poly E-rich protein                                                                                        | 1                                | 1          | 1     | 1   |
| HP0323 | JHP0306 | nuc       | membrane bound endonuclease ,<br>putative<br>ENDONUCLEASE                                                  | 1                                | 1          | 1     | 1   |
| HP0324 | JHP0307 | omp10     | outer membrane protein , putative Outer membrane protein                                                   | 1                                | 1          | 1     | 1   |
| HP0325 | JHP0308 | flgH      | flagellar basal-body L-ring protein ,<br>FLAGELLAR L-RING PROTEIN<br>PRECURSOR (BASAL BODY L-RING PROTEIN) | 1                                | 1          | 1     | 1   |

Supplemental Table 3

| TIGR   | ASTRA   | Gene Name | Gene Description                                                                                     | 10700(SS1 premouse) <sup>a</sup> | G27/NSH 57 | NSH79 | SS1 |
|--------|---------|-----------|------------------------------------------------------------------------------------------------------|----------------------------------|------------|-------|-----|
| HP0326 | JHP0309 | neuA      | CMP-N-acetylneuraminic acid synthetase                                                               | 1                                | 1          | 1     | 1   |
| HP0327 | JHP0310 | flaG      | flagellar protein G , putative FLAGELLAR BIOSYNTHESIS PROTEIN                                        | 1                                | 1          | 1     | 1   |
| HP0328 | JHP0311 | lpxK      | conserved hypothetical protein, putative tetraacyldisaccharide-1-P 4'-kinase                         | 1                                | 1          | 1     | 1   |
| HP0329 | JHP0312 | nadE      | NH(3)-dependent NAD <sup>+</sup> synthetase                                                          | 1                                | 1          | 1     | 1   |
| HP0330 | JHP0313 | ilvC      | ketol-acid reductoisomerase                                                                          | 1                                | 1          | 1     | 1   |
| HP0331 | JHP0314 | minD      | cell division inhibitor                                                                              | 1                                | 1          | 1     | 1   |
| HP0332 | JHP0315 | minE      | cell division topological specificity factor , putative cell division topological specificity factor | 1                                | 1          | 1     | 1   |
| HP0333 | JHP0316 | dprA      | DNA processing chain A                                                                               | 1                                | 1          | 1     | 1   |
| HP0334 | JHP0317 |           | conserved hypothetical protein                                                                       | 1                                | 1          | 1     | 1   |
| HP0335 | N/A     |           |                                                                                                      | 0                                | 0          | 0     | 0   |
| HP0336 | N/A     |           |                                                                                                      | 0                                | 1          | 0     | 0   |
| HP0337 | JHP0319 |           |                                                                                                      | 1                                | 1          | 1     | 1   |
| HP0338 | JHP0320 |           |                                                                                                      | 1                                | 1          | 1     | 1   |
| HP0339 | N/A     |           |                                                                                                      | 0                                | 1          | 0     | 0   |
| HP0340 | N/A     |           |                                                                                                      | 0                                | 1          | 0     | 0   |
| HP0341 | N/A     |           |                                                                                                      | 0                                | 1          | 0     | 1   |
| HP0342 | N/A     |           |                                                                                                      | 0                                | 1          | 0     | 0   |
| HP0343 | N/A     |           |                                                                                                      | 0                                | 1          | 1     | 0   |
| HP0344 | N/A     |           |                                                                                                      | 0                                | 1          | 0     | 0   |
| HP0345 | N/A     |           |                                                                                                      | 0                                | 1          | 1     | 0   |
| HP0346 | N/A     |           |                                                                                                      | 0                                | 1          | 0     | 0   |
| HP0347 | JHP0321 |           | conserved hypothetical protein                                                                       | 1                                | 1          | 1     | 1   |
| HP0348 | JHP0322 | recJ      | single-stranded-DNA-specific exonuclease , putative SINGLE-STRANDED-DNA-SPECIFIC EXONUCLEASE RECJ    | 1                                | 1          | 1     | 1   |
| HP0349 | JHP0323 | pyrG      | CTP synthetase , CTP SYNTHASE                                                                        | 1                                | 1          | 1     | 1   |
| HP0350 | JHP0324 |           |                                                                                                      | 1                                | 1          | 1     | 1   |

Supplemental Table 3

| TIGR   | ASTRA   | Gene Name  | Gene Description                                                                                       | 10700(SS1 premouse) <sup>a</sup> | G27/NSH 57 | NSH79 | SS1 |
|--------|---------|------------|--------------------------------------------------------------------------------------------------------|----------------------------------|------------|-------|-----|
| HP0352 | JHP0326 | fliG       | flagellar motor switch protein                                                                         | 1                                | 1          | 1     | 1   |
| HP0353 | JHP0327 | fliH       | flagellar export protein , putative FLAGELLAR EXPORT APPARATUS                                         | 1                                | 1          | 1     | 1   |
| HP0354 | JHP0328 | dxs        | deoxyxylulose-5-phosphate synthase, putative , 1-DEOXYXYLULOSE-5-PHOSPHATE SYNTHASE                    | 1                                | 1          | 1     | 1   |
| HP0355 | JHP0329 | lepA       | GTP-binding membrane protein , GTP-BINDING PROTEIN                                                     | 1                                | 1          | 1     | 1   |
| HP0356 | JHP0330 |            |                                                                                                        | 0                                | 1          | 0     | 0   |
| HP0357 | JHP1023 |            | short chain alcohol dehydrogenase, putative oxidoreductase                                             | 1                                | 1          | 1     | 1   |
| HP0360 | JHP1020 | galE       | UDP-glucose 4-epimerase                                                                                | 1                                | 1          | 1     | 1   |
| HP0361 | JHP1019 | hisT, truA | pseudouridylate synthase I                                                                             | 1                                | 1          | 1     | 1   |
| HP0362 | JHP1018 |            | conserved hypothetical integral membrane protein                                                       | 1                                | 1          | 1     | 1   |
| HP0363 | JHP1017 | pcm        | L-isoaspartyl-protein carboxyl methyltransferase , PROTEIN-L-ISOASPARTATE O-METHYLTRANSFERASE          | 1                                | 1          | 1     | 1   |
| HP0364 | JHP1016 | nrdB       | ribonucleoside diphosphate reductase, beta subunit , RIBONUCLEOSIDE-DIPHOSPHATE REDUCTASE 1 BETA CHAIN | 1                                | 1          | 1     | 1   |
| HP0366 | JHP1015 |            | spore coat polysaccharide biosynthesis protein C, putative SUGAR NUCLEOTIDE BIOSYNTHESIS               | 1                                | 1          | 1     | 1   |

Supplemental Table 3

| TIGR   | ASTRA   | Gene Name  | Gene Description                                                                     | 10700(SS1 premouse) <sup>a</sup> | G27/NSH 57 | NSH79 | SS1 |
|--------|---------|------------|--------------------------------------------------------------------------------------|----------------------------------|------------|-------|-----|
| HP0367 | JHP1014 |            |                                                                                      | 1                                | 1          | 1     | 1   |
| HP0368 | JHP1013 |            |                                                                                      | 1                                | 1          | 1     | 1   |
| HP0369 | JHP1012 |            | putative TYPE II DNA MODIFICATION ENZYME (METHYLTRANSFERASE)                         | 1                                | 1          | 1     | 1   |
| HP0370 | JHP1011 | accC       | biotin carboxylase                                                                   | 1                                | 1          | 1     | 1   |
| HP0371 | JHP1010 | fabE, accB | biotin carboxyl carrier protein                                                      | 1                                | 1          | 1     | 1   |
| HP0372 | JHP1009 | dcd        | deoxycytidine triphosphate deaminase                                                 | 1                                | 1          | 1     | 1   |
| HP0373 | JHP1008 |            | conserved hypothetical protein, putative outer membrane protein                      | 0                                | 1          | 1     | 0   |
| HP0374 | JHP1007 |            | conserved hypothetical protein                                                       | 1                                | 1          | 1     | 1   |
| HP0375 | JHP1006 |            |                                                                                      | 1                                | 1          | 1     | 1   |
| HP0376 | JHP1005 | hemH       | ferrochelatase                                                                       | 1                                | 1          | 1     | 1   |
| HP0377 | JHP1004 | dsbC       | thiol:disulfide interchange protein                                                  | 1                                | 1          | 1     | 1   |
| HP0378 | JHP1003 | ycf5       | cytochrome c biogenesis protein , putative CYTOCHROME C-TYPE BIOGENESIS PROTEIN      | 1                                | 1          | 1     | 1   |
| HP0379 | JHP1002 |            | fucosyltransferase, ALPHA-(1,3)-FUCOSYLTRANSFERASE                                   | 1                                | 1          | 1     | 1   |
| HP0380 | JHP1001 | gdhA       | glutamate dehydrogenase                                                              | 1                                | 1          | 1     | 1   |
| HP0381 | JHP1000 | hemK, hemG | protoporphyrinogen oxidase                                                           | 1                                | 1          | 1     | 1   |
| HP0382 | JHP0999 | YJR117W    | zinc-metallo protease , putative ZINC-METALLO PROTEASE                               | 1                                | 1          | 1     | 1   |
| HP0383 | JHP0998 |            |                                                                                      | 1                                | 1          | 1     | 1   |
| HP0384 | JHP0997 |            |                                                                                      | 1                                | 1          | 1     | 1   |
| HP0387 | JHP0994 | priA       | primosomal protein replication factor , PRIMOSOMAL PROTEIN N' (REPLICATION FACTOR Y) | 1                                | 1          | 1     | 1   |

Supplemental Table 3

| TIGR   | ASTRA   | Gene Name    | Gene Description                                                                             | 10700(SS1 premouse) <sup>a</sup> | G27/NSH 57 | NSH79 | SS1 |
|--------|---------|--------------|----------------------------------------------------------------------------------------------|----------------------------------|------------|-------|-----|
| HP0388 | JHP0993 |              | conserved hypothetical protein                                                               | 1                                | 1          | 1     | 1   |
| HP0389 | JHP0992 | sodB, sodF   | superoxide dismutase , iron-dependent superoxide dismutase                                   | 1                                | 1          | 1     | 1   |
| HP0391 | JHP0990 | cheW         | purine-binding chemotaxis protein , histidine kinase - MCP coupling protein                  | 1                                | 1          | 1     | 1   |
| HP0392 | JHP0989 | cheA         | histidine kinase                                                                             | 1                                | 1          | 1     | 1   |
| HP0393 | JHP0988 | cheV, cheV_3 | chemotaxis protein , putative chemotaxis protein                                             | 1                                | 1          | 1     | 1   |
| HP0394 | JHP0987 |              |                                                                                              | 1                                | 1          | 1     | 1   |
| HP0395 | JHP0986 |              | conserved hypothetical protein                                                               | 1                                | 1          | 1     | 1   |
| HP0396 | JHP0985 |              | conserved hypothetical protein                                                               | 1                                | 1          | 1     | 1   |
| HP0397 | JHP0984 | serA         | phosphoglycerate dehydrogenase , D-3-PHOSPHOGLYCERATE DEHYDROGENASE                          | 1                                | 1          | 1     | 1   |
| HP0398 | JHP0983 |              |                                                                                              | 1                                | 1          | 1     | 0   |
| HP0399 | JHP0982 | rps1, rpsA   | ribosomal protein S1 , 30S RIBOSOMAL PROTEIN S1                                              | 1                                | 1          | 1     | 1   |
| HP0400 | JHP0981 | lytB         | penicillin tolerance protein , LYSIS TOLERANCE PROTEIN                                       | 1                                | 1          | 1     | 1   |
| HP0401 | JHP0980 | aroA         | 3-phosphoshikimate 1-carboxyvinyltransferase , 3-PHOSPHOSHIKIMATE 1-CARBOXYVINYL TRANSFERASE | 1                                | 1          | 1     | 1   |
| HP0402 | JHP0979 | pheT         | phenylalanyl-tRNA synthetase, beta subunit , PHENYLALANYL-TRNA SYNTHETASE BETA CHAIN         | 1                                | 1          | 1     | 1   |

Supplemental Table 3

| TIGR   | ASTRA   | Gene Name  | Gene Description                                                                       | 10700(SS1 premouse) <sup>a</sup> | G27/NSH 57 | NSH79 | SS1 |
|--------|---------|------------|----------------------------------------------------------------------------------------|----------------------------------|------------|-------|-----|
| HP0403 | JHP0978 | pheS       | phenylalanyl-tRNA synthetase, alpha subunit , PHENYLALANYL-TRNA SYNTHETASE ALPHA CHAIN | 1                                | 1          | 1     | 1   |
| HP0404 | JHP0977 |            | protein kinase C inhibitor , HIT FAMILY PROTEIN                                        | 1                                | 1          | 1     | 1   |
| HP0405 | JHP0976 |            | nifS-like protein, putative AMINOTRANSFERAS E                                          | 1                                | 1          | 1     | 1   |
| HP0406 | JHP0975 |            |                                                                                        | 1                                | 1          | 1     | 1   |
| HP0407 | JHP0974 | bisC       | biotin sulfoxide reductase , putative S/N-oxide reductase                              | 1                                | 1          | 1     | 1   |
| HP0408 | JHP0973 |            |                                                                                        | 1                                | 1          | 1     | 1   |
| HP0409 | JHP0972 | guaA       | GMP synthase , GMP SYNTHETASE                                                          | 1                                | 1          | 1     | 1   |
| HP0410 | JHP0971 | hpaA       | putative neuraminylactose-binding hemagglutinin homolog , putative PARALOG OF HpaA     | 1                                | 1          | 1     | 1   |
| HP0411 | N/A     |            |                                                                                        | 1                                | 1          | 1     | 1   |
| HP0413 | N/A     |            | transposase-like protein, PS3IS                                                        | 0                                | 0          | 1     | 0   |
| HP0414 | N/A     |            | IS200 insertion sequence from SARA17                                                   | 0                                | 0          | 1     | 0   |
| HP0415 | JHP0969 |            | conserved hypothetical integral membrane protein                                       | 1                                | 1          | 1     | 1   |
| HP0416 | JHP0968 | cfa        | cyclopropane fatty acid synthase , CYCLOPOCYCLOPROPANE FATTY ACID SYNTHASE             | 1                                | 1          | 1     | 1   |
| HP0417 | JHP0967 | metS, metG | methionyl-tRNA synthetase                                                              | 1                                | 1          | 1     | 1   |
| HP0418 | JHP0966 |            |                                                                                        | 1                                | 1          | 1     | 1   |
| HP0419 | JHP0965 |            | conserved hypothetical protein                                                         | 1                                | 1          | 1     | 1   |
| HP0420 | JHP0964 |            |                                                                                        | 1                                | 1          | 1     | 1   |

Supplemental Table 3

| TIGR   | ASTRA   | Gene Name    | Gene Description                                                                                     | 10700(SS1 premouse) <sup>a</sup> | G27/NSH 57 | NSH79 | SS1 |
|--------|---------|--------------|------------------------------------------------------------------------------------------------------|----------------------------------|------------|-------|-----|
| HP0421 | JHP0963 | capJ         | type 1 capsular polysaccharide biosynthesis protein J , putative POLYSACCHARIDE BIOSYNTHESIS PROTEIN | 1                                | 1          | 1     | 1   |
| HP0422 | JHP0962 | speA         | arginine decarboxylase                                                                               | 1                                | 1          | 1     | 1   |
| HP0423 | N/A     |              |                                                                                                      | 0                                | 1          | 0     | 0   |
| HP0424 | N/A     |              |                                                                                                      | 1                                | 1          | 1     | 1   |
| HP0425 | N/A     |              |                                                                                                      | 1                                | 1          | 1     | 1   |
| HP0426 | N/A     |              |                                                                                                      | 1                                | 1          | 1     | 1   |
| HP0427 | JHP0952 |              |                                                                                                      | 0                                | 1          | 0     | 0   |
| HP0431 | N/A     | ptc1         | protein phosphatase 2C homolog                                                                       | 0                                | 1          | 0     | 0   |
| HP0432 | N/A     |              | protein kinase C-like protein                                                                        | 0                                | 1          | 0     | 0   |
| HP0434 | N/A     |              |                                                                                                      | 0                                | 0          | 0     | 0   |
| HP0435 | N/A     |              |                                                                                                      | 0                                | 0          | 0     | 0   |
| HP0438 | N/A     | tnpB         | IS605 transposase                                                                                    | 0                                | 1          | 0     | 0   |
| HP0447 | N/A     |              | conserved hypothetical protein                                                                       | 0                                | 0          | 0     | 0   |
| HP0448 | N/A     |              |                                                                                                      | 0                                | 0          | 0     | 0   |
| HP0449 | N/A     |              |                                                                                                      | 0                                | 0          | 0     | 0   |
| HP0450 | N/A     |              |                                                                                                      | 0                                | 0          | 0     | 0   |
| HP0451 | N/A     |              |                                                                                                      | 0                                | 0          | 0     | 0   |
| HP0452 | N/A     |              | conserved hypothetical protein                                                                       | 0                                | 0          | 0     | 0   |
| HP0453 | N/A     |              |                                                                                                      | 0                                | 1          | 0     | 0   |
| HP0454 | N/A     |              |                                                                                                      | 0                                | 1          | 0     | 0   |
| HP0456 | N/A     |              |                                                                                                      | 0                                | 1          | 1     | 0   |
| HP0459 | N/A     | virB4        | virB4 homolog                                                                                        | 0                                | 0          | 1     | 0   |
| HP0462 | N/A     | hsdS         | type I restriction enzyme S protein                                                                  | 1                                | 1          | 1     | 1   |
| HP0463 | JHP0415 | hsdM, hsdM_1 | type I restriction enzyme M protein , TYPE I RESTRICTION ENZYME (MODIFICATION SUBUNIT)               | 1                                | 1          | 1     | 1   |
| HP0464 | JHP0416 | hsdR         | type I restriction enzyme R protein                                                                  | 1                                | 1          | 1     | 1   |
| HP0465 | JHP0417 |              | conserved hypothetical protein                                                                       | 1                                | 1          | 1     | 1   |
| HP0466 | JHP0418 |              | conserved hypothetical protein                                                                       | 1                                | 1          | 1     | 1   |



Supplemental Table 3

| TIGR   | ASTRA   | Gene Name    | Gene Description                                                                                                           | 10700(SS1 premouse) <sup>a</sup> | G27/NSH 57 | NSH79 | SS1 |
|--------|---------|--------------|----------------------------------------------------------------------------------------------------------------------------|----------------------------------|------------|-------|-----|
| HP0467 | JHP0419 |              | conserved hypothetical integral membrane protein                                                                           | 1                                | 1          | 1     | 1   |
| HP0468 | JHP0420 |              | conserved hypothetical protein                                                                                             | 1                                | 1          | 1     | 0   |
| HP0469 | JHP0421 |              | conserved hypothetical protein                                                                                             | 1                                | 1          | 1     | 1   |
| HP0470 | JHP0422 | pepF         | oligoendopeptidase F , OLIGOPEPTIDASE                                                                                      | 1                                | 1          | 1     | 1   |
| HP0471 | JHP0423 | kefB         | glutathione-regulated potassium-efflux system protein                                                                      | 1                                | 1          | 1     | 1   |
| HP0472 | JHP0424 | omp11        | outer membrane protein , putative Outer membrane protein                                                                   | 1                                | 1          | 1     | 1   |
| HP0473 | JHP0425 | modA         | molybdenum ABC transporter, periplasmic molybdate-binding protein , Molybdate ABC transporter, periplasmic-binding protein | 1                                | 1          | 1     | 1   |
| HP0474 | JHP0426 | modB         | molybdenum ABC transporter, permease protein , Molybdate ABC transporter, permease                                         | 1                                | 1          | 1     | 1   |
| HP0475 | JHP0427 | modD, modC   | molybdenum ABC transporter, ATP-binding protein , Molybdate ABC transporter, ATP-binding protein                           | 1                                | 1          | 1     | 1   |
| HP0476 | JHP0428 | gltX, gltX_1 | glutamyl-tRNA synthetase                                                                                                   | 1                                | 1          | 1     | 1   |
| HP0477 | JHP0429 | omp12        | outer membrane protein , putative Outer membrane protein                                                                   | 1                                | 1          | 1     | 1   |
| HP0478 | JHP0430 | VSPIM        | adenine specific DNA methyltransferase , TYPE II DNA MODIFICATION ENZYME (METHYLTRANSFERASE)                               | 1                                | 1          | 1     | 1   |
| HP0479 | JHP0431 |              |                                                                                                                            | 1                                | 1          | 1     | 1   |

Supplemental Table 3

| TIGR   | ASTRA   | Gene Name   | Gene Description                                                                 | 10700(SS1 premouse) <sup>a</sup> | G27/NSH 57 | NSH79 | SS1 |
|--------|---------|-------------|----------------------------------------------------------------------------------|----------------------------------|------------|-------|-----|
| HP0480 | JHP0432 | yihK        | GTP-binding protein, fusA-homolog                                                | 1                                | 1          | 1     | 1   |
| HP0482 | JHP0434 |             |                                                                                  | 1                                | 1          | 1     | 1   |
| HP0483 | JHP0435 |             | TYPE II DNA MODIFICATION ENZYME (METHYLTRANSFERASE)                              | 1                                | 1          | 1     | 1   |
| HP0484 | JHP0436 |             |                                                                                  | 1                                | 1          | 1     | 1   |
| HP0485 | JHP0437 |             | catalase-like protein                                                            | 1                                | 1          | 1     | 1   |
| HP0486 | JHP0438 |             | Outer membrane protein                                                           | 1                                | 1          | 1     | 1   |
| HP0487 | JHP0439 |             | putative Outer membrane protein                                                  | 1                                | 1          | 1     | 1   |
| HP0488 | JHP0440 |             |                                                                                  | 0                                | 1          | 0     | 1   |
| HP0490 | JHP0442 |             | putative potassium channel protein, putative, PUTATIVE POTASSIUM CHANNEL PROTEIN | 1                                | 1          | 1     | 1   |
| HP0491 | JHP0443 | rpL28, rpmB | ribosomal protein L28 , 50S RIBOSOMAL PROTEIN L28                                | 1                                | 1          | 1     | 1   |
| HP0492 | JHP0444 |             | putative paralog of HpaA                                                         | 1                                | 1          | 1     | 1   |
| HP0493 | JHP0445 | mraY        | phospho-N-acetylmuramoyl-pentapeptide-transferase                                | 1                                | 1          | 1     | 1   |
| HP0495 | JHP0447 |             |                                                                                  | 1                                | 1          | 1     | 1   |
| HP0497 | JHP0449 |             | sodium- and chloride-dependent transporter, putative transporter                 | 1                                | 1          | 1     | 1   |
| HP0498 | JHP0450 |             | sodium- and chloride-dependent transporter, putative transporter                 | 1                                | 1          | 1     | 1   |
| HP0499 | JHP0451 | pldA        | phospholipase A1 precursor (DR-phospholipase A), putative PHOSPHOLIPASE A1       | 1                                | 1          | 1     | 1   |
| HP0500 | JHP0452 | dnaN        | DNA polymerase III beta-subunit , DNA POLYMERASE III, BETA CHAIN                 | 1                                | 1          | 1     | 1   |

Supplemental Table 3

| TIGR   | ASTRA   | Gene Name      | Gene Description                                                                     | 10700(SS1 premouse) <sup>a</sup> | G27/NSH 57 | NSH79 | SS1 |
|--------|---------|----------------|--------------------------------------------------------------------------------------|----------------------------------|------------|-------|-----|
| HP0501 | JHP0453 | gyrB           | DNA gyrase, sub B ,<br>DNA GYRASE<br>SUBUNIT B                                       | 1                                | 1          | 1     | 1   |
| HP0502 | JHP0454 |                |                                                                                      | 1                                | 1          | 1     | 1   |
| HP0503 | JHP0454 |                |                                                                                      | 1                                | 1          | 1     | 1   |
| HP0506 | JHP0456 |                | conserved hypothetical<br>secreted protein,<br>putative Outer<br>membrane protein    | 1                                | 1          | 1     | 1   |
| HP0507 | JHP0457 |                | conserved hypothetical<br>protein                                                    | 1                                | 1          | 1     | 1   |
| HP0508 | JHP0458 |                |                                                                                      | 1                                | 1          | 1     | 1   |
| HP0509 | JHP0459 | glcD           | glycolate oxidase<br>subunit , putative<br>Glycolate oxidase                         | 1                                | 1          | 1     | 1   |
| HP0510 | JHP0460 | dapB           | dihydrodipicolinate<br>reductase                                                     | 1                                | 1          | 1     | 1   |
| HP0513 | JHP0462 |                |                                                                                      | 0                                | 0          | 0     | 0   |
| HP0514 | JHP0463 | rpl9, rplI     | ribosomal protein L9 ,<br>50S RIBOSOMAL<br>PROTEIN L9                                | 1                                | 1          | 1     | 1   |
| HP0515 | JHP0464 | hslV           | heat shock protein                                                                   | 1                                | 1          | 1     | 1   |
| HP0516 | JHP0465 | hslU           | heat shock protein                                                                   | 1                                | 1          | 1     | 1   |
| HP0518 | JHP0467 |                | conserved hypothetical<br>secreted protein                                           | 1                                | 1          | 1     | 1   |
| HP0519 | JHP0468 |                | conserved hypothetical<br>protein                                                    | 1                                | 1          | 1     | 1   |
| HP0520 | JHP0469 | cag1, orf6     | cag pathogenicity<br>island protein , putative<br>cag island protein                 | 1                                | 1          | 1     | 1   |
| HP0521 | JHP0470 | orf7           | cag island protein                                                                   | 1                                | 1          | 0     | 1   |
| HP0522 | JHP0471 | cag3, orf8     | cag pathogenicity<br>island protein , cag<br>island protein                          | 1                                | 1          | 1     | 1   |
| HP0523 | JHP0472 | cag4, orf9     | cag pathogenicity<br>island protein , cag<br>island protein                          | 1                                | 1          | 1     | 1   |
| HP0524 | JHP0473 | cag5,<br>virD4 | cag pathogenicity<br>island protein , cag<br>island protein, DNA<br>transfer protein | 1                                | 1          | 1     | 1   |
| HP0525 | JHP0474 | virB11_1       | virB11 homolog, cag<br>island protein, DNA<br>transfer protein                       | 1                                | 1          | 1     | 1   |
| HP0526 | JHP0475 | cag6,<br>orf12 | cag pathogenicity<br>island protein , cag<br>island protein                          | 1                                | 1          | 1     | 1   |

Supplemental Table 3

| TIGR   | ASTRA   | Gene Name    | Gene Description                                                                      | 10700(SS1 premouse) <sup>a</sup> | G27/NSH 57 | NSH79 | SS1 |
|--------|---------|--------------|---------------------------------------------------------------------------------------|----------------------------------|------------|-------|-----|
| HP0528 | JHP0477 | cag8, orf15  | cag pathogenicity island protein , cag island protein                                 | 1                                | 1          | 1     | 1   |
| HP0529 | JHP0478 | cag9, orf16  | cag pathogenicity island protein , cag island protein                                 | 1                                | 1          | 1     | 1   |
| HP0530 | JHP0479 | cag10, orf17 | cag pathogenicity island protein , cag island protein                                 | 1                                | 1          | 1     | 1   |
| HP0531 | JHP0480 | cag11, orf18 | cag pathogenicity island protein , cag island protein                                 | 1                                | 1          | 1     | 1   |
| HP0532 | JHP0481 | cag12, cagT  | cag pathogenicity island protein , cag island protein                                 | 1                                | 1          | 1     | 1   |
| HP0534 | JHP0482 | cag13, cagS  | cag pathogenicity island protein , cag island protein                                 | 1                                | 1          | 1     | 1   |
| HP0535 | JHP0483 | cag14, cagQ  | cag pathogenicity island protein , cag island protein                                 | 1                                | 1          | 1     | 1   |
| HP0536 | JHP0484 | cag15, cagP  | cag pathogenicity island protein , cag island protein                                 | 1                                | 1          | 1     | 1   |
| HP0537 | JHP0485 | cag16, cagM  | cag pathogenicity island protein , cag island protein                                 | 1                                | 1          | 1     | 1   |
| HP0538 | JHP0486 | cag17, cagN  | cag pathogenicity island protein , cag island protein                                 | 1                                | 1          | 1     | 1   |
| HP0539 | JHP0487 | cag18, cagL  | cag pathogenicity island protein , cag island protein                                 | 1                                | 1          | 1     | 1   |
| HP0540 | JHP0488 | cag19, cagI  | cag pathogenicity island protein , cag island protein                                 | 1                                | 1          | 1     | 1   |
| HP0542 | JHP0490 | cag21, cagG  | cag pathogenicity island protein , cag island protein                                 | 1                                | 1          | 1     | 1   |
| HP0543 | JHP0491 | cag22, cagF  | cag pathogenicity island protein , cag island protein                                 | 1                                | 1          | 1     | 1   |
| HP0544 | JHP0492 | cag23, cagE  | cag pathogenicity island protein , DNA transfer protein (Agrobacterium VirB4 homolog) | 1                                | 1          | 1     | 1   |
| HP0545 | JHP0493 | cag24, cagD  | cag pathogenicity island protein , cag island protein                                 | 1                                | 1          | 1     | 1   |

Supplemental Table 3

| TIGR   | ASTRA   | Gene Name   | Gene Description                                                                    | 10700(SS1 premouse) <sup>a</sup> | G27/NSH 57 | NSH79 | SS1 |
|--------|---------|-------------|-------------------------------------------------------------------------------------|----------------------------------|------------|-------|-----|
| HP0546 | JHP0494 | cag25, cagC | cag pathogenicity island protein , cag island protein                               | 1                                | 1          | 1     | 1   |
| HP0548 | N/A     |             |                                                                                     | 1                                | 1          | 0     | 1   |
| HP0549 | JHP0496 | glr, murI   | glutamate racemase                                                                  | 1                                | 1          | 1     | 1   |
| HP0550 | JHP0497 | rho         | transcription termination factor Rho , TRANSCRIPTION TERMINATION FACTOR             | 1                                | 1          | 1     | 1   |
| HP0551 | JHP0498 | rpl31, rpmE | ribosomal protein L31 , 50S RIBOSOMAL PROTEIN L31                                   | 1                                | 1          | 1     | 1   |
| HP0552 | JHP0499 |             | conserved hypothetical protein                                                      | 1                                | 1          | 1     | 1   |
| HP0553 | JHP0500 |             | conserved hypothetical protein                                                      | 1                                | 1          | 1     | 1   |
| HP0554 | JHP0501 |             |                                                                                     | 1                                | 1          | 1     | 1   |
| HP0556 | JHP0503 |             |                                                                                     | 1                                | 1          | 1     | 1   |
| HP0557 | JHP0504 | accA        | acetyl-coenzyme A carboxylase , ACETYL-COENZYME A CARBOXYLASE SUBUNIT A             | 1                                | 1          | 1     | 1   |
| HP0558 | JHP0505 | fabF, fabB  | beta ketoacyl-acyl carrier protein synthase II , BETA-KETOACYL-ACP SYNTHASE I       | 1                                | 1          | 1     | 1   |
| HP0559 | JHP0506 | acpP        | acyl carrier protein                                                                | 1                                | 1          | 1     | 1   |
| HP0561 | JHP0508 | fabG        | 3-ketoacyl-acyl carrier protein reductase , ACETYL-COENZYME A CARBOXYLASE SUBUNIT A | 1                                | 1          | 1     | 1   |
| HP0563 | JHP0510 |             |                                                                                     | 1                                | 1          | 1     | 1   |
| HP0565 | JHP0512 |             |                                                                                     | 1                                | 1          | 1     | 1   |
| HP0566 | JHP0513 | dapF        | diaminopimelate epimerase                                                           | 1                                | 1          | 1     | 1   |
| HP0567 | JHP0514 |             | membrane protein, putative Inner membrane protein                                   | 1                                | 1          | 1     | 1   |
| HP0568 | JHP0515 |             |                                                                                     | 1                                | 1          | 1     | 1   |
| HP0569 | JHP0516 | gtp1        | GTP-binding protein                                                                 | 1                                | 1          | 1     | 1   |
| HP0570 | JHP0517 | pepA        | aminopeptidase a/i , AMINOPEPTIDASE                                                 | 1                                | 1          | 1     | 1   |

Supplemental Table 3

| TIGR   | ASTRA   | Gene Name    | Gene Description                                                                                                          | 10700(SS1 premouse) <sup>a</sup> | G27/NSH 57 | NSH79 | SS1 |
|--------|---------|--------------|---------------------------------------------------------------------------------------------------------------------------|----------------------------------|------------|-------|-----|
| HP0572 | JHP0519 | apt          | adenine phosphoribosyltransferase                                                                                         | 1                                | 1          | 1     | 1   |
| HP0573 | JHP0520 |              |                                                                                                                           | 1                                | 1          | 1     | 1   |
| HP0574 | JHP0521 | lacA, rpi    | galactosidase acetyltransferase, RIBOSE 5-PHOSPHATE ISOMERASE                                                             | 1                                | 1          | 1     | 1   |
| HP0575 | JHP0522 |              | conserved hypothetical membrane protein                                                                                   | 1                                | 1          | 1     | 1   |
| HP0576 | JHP0523 | lepB         | signal peptidase I                                                                                                        | 1                                | 1          | 1     | 1   |
| HP0577 | JHP0524 | folD         | methylene-tetrahydrofolate dehydrogenase, METHYLENETETRAHYDROFOLATE DEHYDROGENASE/METHENYLtetrahydrofolate cyclohydrolase | 1                                | 1          | 1     | 1   |
| HP0578 | JHP0525 |              |                                                                                                                           | 1                                | 1          | 1     | 1   |
| HP0579 | JHP0526 |              |                                                                                                                           | 1                                | 1          | 1     | 1   |
| HP0580 | JHP0527 |              |                                                                                                                           | 1                                | 1          | 1     | 1   |
| HP0581 | JHP0528 | pyrC, pyrC_2 | dihydroorotase                                                                                                            | 1                                | 1          | 1     | 1   |
| HP0582 | JHP0529 | tonB_1       | putative siderophore-mediated iron transport protein                                                                      | 1                                | 1          | 1     | 1   |
| HP0583 | JHP0530 |              |                                                                                                                           | 1                                | 1          | 1     | 1   |
| HP0584 | JHP0531 | fliN         | flagellar switch protein                                                                                                  | 1                                | 1          | 1     | 1   |
| HP0585 | JHP0532 | nth          | endonuclease III                                                                                                          | 1                                | 1          | 1     | 1   |
| HP0586 | JHP0534 |              |                                                                                                                           | 1                                | 1          | 1     | 1   |
| HP0587 | JHP0535 | pabC         | aminodeoxychorismate lyase                                                                                                | 1                                | 1          | 1     | 1   |
| HP0588 | JHP0536 | oorD         | ferredoxin-like protein, subunit of 2-oxoglutarate oxidoreductase                                                         | 1                                | 1          | 1     | 1   |
| HP0589 | JHP0537 | oorA         | ferredoxin oxidoreductase, alpha subunit, subunit of 2-oxoglutarate oxidoreductase                                        | 1                                | 1          | 1     | 1   |

Supplemental Table 3

| TIGR   | ASTRA   | Gene Name | Gene Description                                                                              | 10700(SS1 premouse) <sup>a</sup> | G27/NSH 57 | NSH79 | SS1 |
|--------|---------|-----------|-----------------------------------------------------------------------------------------------|----------------------------------|------------|-------|-----|
| HP0590 | JHP0538 | oorB      | ferredoxin oxidoreductase, beta subunit, SUBUNIT OF 2-OXOGLUTARATE OXIDOREDUCTASE             | 1                                | 1          | 1     | 1   |
| HP0591 | JHP0539 | oorC      | ferredoxin oxidoreductase, gamma subunit, SUBUNIT OF 2-OXOGLUTARATE OXIDOREDUCTASE            | 1                                | 1          | 1     | 1   |
| HP0593 | N/A     | mod       | adenine specific DNA methyltransferase                                                        | 0                                | 1          | 0     | 0   |
| HP0594 | JHP0541 |           |                                                                                               | 1                                | 1          | 1     | 1   |
| HP0595 | JHP0542 |           |                                                                                               | 1                                | 1          | 1     | 1   |
| HP0596 | JHP0543 |           |                                                                                               | 1                                | 1          | 1     | 1   |
| HP0597 | JHP0544 | PBP-1A    | penicillin-binding protein 1A , PENICILLIN-BINDING PROTEIN                                    | 1                                | 1          | 1     | 1   |
| HP0598 | JHP0545 | bioF      | 8-amino-7-oxononanoate synthase                                                               | 1                                | 1          | 1     | 1   |
| HP0600 | JHP0547 | spaB      | multidrug resistance protein , putative secretion/efflux abc transporter, ATP-binding protein | 0                                | 1          | 1     | 1   |
| HP0601 | JHP0548 | flaA      | flagellin A                                                                                   | 1                                | 1          | 1     | 1   |
| HP0602 | JHP0549 |           | endonuclease III                                                                              | 1                                | 1          | 1     | 1   |
| HP0603 | JHP0550 |           |                                                                                               | 1                                | 1          | 1     | 1   |
| HP0604 | JHP0551 | hemE      | uroporphyrinogen decarboxylase                                                                | 1                                | 1          | 1     | 1   |
| HP0605 | JHP0552 |           |                                                                                               | 1                                | 1          | 1     | 1   |
| HP0606 | JHP0553 | mtrC      | membrane fusion protein , putative efflux transporter                                         | 1                                | 1          | 1     | 1   |
| HP0607 | JHP0554 | acrB      | acriflavine resistance protein , putative efflux transporter                                  | 1                                | 1          | 1     | 1   |
| HP0611 | JHP0299 |           |                                                                                               | 1                                | 1          | 1     | 1   |
| HP0612 | JHP0299 |           |                                                                                               | 1                                | 1          | 1     | 1   |
| HP0613 | JHP0300 |           | ABC transporter, ATP-binding protein, putative abc transporter, ATP-binding protein           | 1                                | 1          | 1     | 1   |
| HP0614 | JHP0557 |           |                                                                                               | 1                                | 1          | 1     | 1   |
| HP0615 | JHP0558 | lig       | DNA ligase                                                                                    | 1                                | 1          | 1     | 1   |

Supplemental Table 3

| TIGR   | ASTRA   | Gene Name    | Gene Description                                                                                                       | 10700(SS1 premouse) <sup>a</sup> | G27/NSH 57 | NSH79 | SS1 |
|--------|---------|--------------|------------------------------------------------------------------------------------------------------------------------|----------------------------------|------------|-------|-----|
| HP0616 | JHP0559 | cheV, cheV_2 | chemotaxis protein , putative chemotaxis protein                                                                       | 1                                | 1          | 1     | 1   |
| HP0617 | JHP0560 | aspS         | aspartyl-tRNA synthetase                                                                                               | 1                                | 1          | 1     | 1   |
| HP0618 | JHP0561 | adk          | adenylate kinase                                                                                                       | 1                                | 1          | 1     | 1   |
| HP0619 | JHP0563 |              | putative lipopolysaccharide biosynthesis protein                                                                       | 1                                | 1          | 1     | 1   |
| HP0620 | JHP0564 | ppa          | inorganic pyrophosphatase                                                                                              | 1                                | 1          | 1     | 1   |
| HP0621 | JHP0565 | MutS         | DNA mismatch repair protein                                                                                            | 1                                | 1          | 1     | 1   |
| HP0622 | JHP0566 |              |                                                                                                                        | 1                                | 1          | 1     | 1   |
| HP0623 | JHP0567 | murC         | UDP-N-acetylmuramate-alanine ligase , UDP-N-ACETYLMURAMATE--ALANINE LIGASE                                             | 1                                | 1          | 1     | 1   |
| HP0624 | JHP0568 | aspB         | solute-binding signature and mitochondrial signature protein , AMINOTRANSFERASE                                        | 1                                | 1          | 1     | 1   |
| HP0625 | JHP0569 | gcpE         | protein E                                                                                                              | 1                                | 1          | 1     | 1   |
| HP0626 | JHP0570 | dapD         | tetrahydrodipicolinate N-succinyltransferase , putative 2,3,4,5-TETRAHYDROPYRIDINE-2-CARBOXYLATE N-SUCCINYLTRANSFERASE | 1                                | 1          | 1     | 1   |
| HP0627 | JHP0571 |              |                                                                                                                        | 1                                | 1          | 1     | 1   |
| HP0628 | JHP0571 |              |                                                                                                                        | 1                                | 1          | 1     | 1   |
| HP0629 | JHP0572 |              |                                                                                                                        | 1                                | 1          | 1     | 1   |
| HP0630 | JHP0573 | mda66        | modulator of drug activity                                                                                             | 1                                | 1          | 1     | 1   |
| HP0631 | JHP0574 | hydA, hyaA   | quinone-reactive Ni/Fe hydrogenase, small subunit , Hydrogenase, small subunit                                         | 1                                | 1          | 1     | 1   |
| HP0632 | JHP0575 | hydB, hyaB   | quinone-reactive Ni/Fe hydrogenase, large subunit , Hydrogenase, large subunit                                         | 1                                | 1          | 1     | 1   |



Supplemental Table 3

| TIGR   | ASTRA   | Gene Name       | Gene Description                                                                           | 10700(SS1 premouse) <sup>a</sup> | G27/NSH 57 | NSH79 | SS1 |
|--------|---------|-----------------|--------------------------------------------------------------------------------------------|----------------------------------|------------|-------|-----|
| HP0633 | JHP0576 | hydC,<br>hyaC   | quinone-reactive Ni/Fe hydrogenase, cytochrome b subunit , Hydrogenase, cytochrome subunit | 1                                | 1          | 1     | 1   |
| HP0634 | JHP0577 | hydD,<br>hyaD   | quinone-reactive Ni/Fe hydrogenase , Hydrogenase expression/formation protein              | 1                                | 1          | 1     | 1   |
| HP0635 | JHP0578 |                 |                                                                                            | 1                                | 1          | 1     | 1   |
| HP0638 | JHP0581 | omp13           | outer membrane protein , putative Outer membrane protein                                   | 1                                | 1          | 1     | 1   |
| HP0639 | JHP0582 |                 | conserved hypothetical protein                                                             | 1                                | 1          | 1     | 1   |
| HP0640 | JHP0583 | papS,<br>pcnB   | poly(A) polymerase , POLYNUCLEOTIDE ADENYLYLTRANSFERASE                                    | 1                                | 1          | 1     | 1   |
| HP0641 | JHP0584 |                 |                                                                                            | 1                                | 1          | 1     | 0   |
| HP0642 | JHP0586 |                 | NAD(P)H-flavin oxidoreductase, putative Oxidoreductase                                     | 1                                | 1          | 1     | 1   |
| HP0643 | JHP0588 | gltX,<br>gltX_2 | glutamyl-tRNA synthetase                                                                   | 1                                | 1          | 1     | 1   |
| HP0644 | JHP0589 |                 | conserved hypothetical integral membrane protein                                           | 1                                | 1          | 1     | 1   |
| HP0645 | JHP0590 | slt             | soluble lytic murein transglycosylase , LYTIC MUREIN TRANSGLYCOSYLASE                      | 1                                | 1          | 1     | 1   |
| HP0646 | JHP0591 | galU            | UDP-glucose pyrophosphorylase , UTP--GLUCOSE-1-PHOSPHATE URIDYLYLTRANSFERASE               | 1                                | 1          | 1     | 1   |
| HP0647 | JHP0592 |                 |                                                                                            | 1                                | 1          | 1     | 1   |

Supplemental Table 3

| TIGR   | ASTRA   | Gene Name     | Gene Description                                                                                                      | 10700(SS1 premouse) <sup>a</sup> | G27/NSH 57 | NSH79 | SS1 |
|--------|---------|---------------|-----------------------------------------------------------------------------------------------------------------------|----------------------------------|------------|-------|-----|
| HP0648 | JHP0593 | murZ,<br>murA | UDP-N-acetylglucosamine<br>enolpyruvyl transferase<br>, UDP-N-<br>ACETYLGLUCOSAMI<br>NE<br>ENOLPYRUVYLTRAN<br>SFERASE | 1                                | 1          | 1     | 1   |
| HP0649 | JHP0594 | aspA          | aspartate ammonia-<br>lyase                                                                                           | 1                                | 1          | 1     | 1   |
| HP0650 | JHP0595 |               |                                                                                                                       | 1                                | 1          | 1     | 1   |
| HP0652 | JHP0597 | serB          | phosphoserine<br>phosphatase                                                                                          | 1                                | 1          | 1     | 1   |
| HP0654 | JHP0599 |               |                                                                                                                       | 1                                | 1          | 1     | 1   |
| HP0655 | JHP0600 |               | putative Outer<br>membrane protein                                                                                    | 1                                | 1          | 1     | 1   |
| HP0656 | JHP0601 |               |                                                                                                                       | 1                                | 1          | 1     | 1   |
| HP0657 | JHP0602 |               | putative<br>PROCESSING<br>PROTEASE                                                                                    | 1                                | 1          | 1     | 1   |
| HP0659 | JHP0604 |               |                                                                                                                       | 1                                | 1          | 1     | 1   |
| HP0660 | JHP0605 |               |                                                                                                                       | 1                                | 1          | 1     | 1   |
| HP0661 | JHP0606 | rnhA          | RIBONUCLEASE HI                                                                                                       | 1                                | 1          | 1     | 1   |
| HP0662 | JHP0607 | rnc           | RIBONUCLEASE III                                                                                                      | 1                                | 1          | 1     | 1   |
| HP0663 | JHP0608 | aroC          | CHORISMATE<br>SYNTHASE                                                                                                | 1                                | 1          | 1     | 1   |
| HP0664 | JHP0609 |               |                                                                                                                       | 1                                | 1          | 1     | 1   |
| HP0665 | JHP0610 | hemN_1        | OXYGEN-<br>INDEPENDENT<br>COPROPORPHYRIN<br>OGEN III OXIDASE                                                          | 1                                | 1          | 1     | 1   |
| HP0666 | JHP0611 | glpC          | glycerol-3-phosphate<br>dehydrogenase                                                                                 | 1                                | 1          | 1     | 1   |
| HP0667 | JHP0612 |               |                                                                                                                       | 1                                | 1          | 0     | 1   |
| HP0668 | JHP0612 |               |                                                                                                                       | 1                                | 1          | 1     | 1   |
| HP0670 | N/A     |               |                                                                                                                       | 0                                | 0          | 0     | 0   |
| HP0671 | JHP0614 | omp14         | outer membrane<br>protein , putative Outer<br>membrane protein                                                        | 1                                | 1          | 1     | 1   |
| HP0672 | JHP0615 | aspB          | solute-binding<br>signature and<br>mitochondrial<br>signature protein ,<br>ASPARTATE<br>AMINOTRANSFERAS<br>E          | 1                                | 1          | 1     | 1   |
| HP0674 | N/A     |               |                                                                                                                       | 0                                | 0          | 0     | 0   |

Supplemental Table 3

| TIGR   | ASTRA   | Gene Name    | Gene Description                                                                                          | 10700(SS1 premouse) <sup>a</sup> | G27/NSH 57 | NSH79 | SS1 |
|--------|---------|--------------|-----------------------------------------------------------------------------------------------------------|----------------------------------|------------|-------|-----|
| HP0675 | JHP0617 | xerC         | integrase/recombinase , INTEGRASE-RECOMBINASE PROTEIN (XERCD FAMILY)                                      | 1                                | 1          | 1     | 1   |
| HP0676 | JHP0618 | dat1, ogt    | methylated-DNA--protein-cysteine methyltransferase                                                        | 1                                | 1          | 1     | 1   |
| HP0677 | JHP0619 |              | conserved hypothetical integral membrane protein                                                          | 1                                | 1          | 1     | 1   |
| HP0679 | JHP0620 | wbpB         | lipopolysaccharide biosynthesis protein , putative LIPOPOLYSACCHARIDE BIOSYNTHESIS PROTEIN                | 1                                | 1          | 1     | 1   |
| HP0680 | JHP0621 | nrdA         | ribonucleoside-diphosphate reductase 1 alpha subunit , RIBONUCLEOSIDE-DIPHOSPHATE REDUCTASE 1 ALPHA CHAIN | 1                                | 1          | 1     | 1   |
| HP0681 | JHP0622 |              |                                                                                                           | 1                                | 0          | 1     | 1   |
| HP0682 | JHP0623 |              |                                                                                                           | 0                                | 0          | 1     | 1   |
| HP0683 | JHP0624 | glmU         | UDP-N-acetylglucosamine pyrophosphorylase                                                                 | 1                                | 1          | 1     | 1   |
| HP0684 | JHP0625 | fliP         | FLAGELLAR BIOSYNTHESIS PROTEIN                                                                            | 1                                | 1          | 1     | 1   |
| HP0685 | JHP0625 | fliP         | flagellar biosynthetic protein                                                                            | 1                                | 1          | 1     | 1   |
| HP0686 | JHP0626 | fecA, fecA_1 | iron(III) dicitrate transport protein                                                                     | 1                                | 1          | 1     | 1   |
| HP0687 | JHP0627 | feoB         | iron(II) transport protein , FERROUS IRON TRANSPORT PROTEIN B                                             | 1                                | 1          | 1     | 1   |
| HP0690 | JHP0638 | fadA, thl    | acetyl coenzyme A acetyltransferase(thiolase) , ACETYL-COA ACETYLTRANSFERASE                              | 1                                | 1          | 1     | 1   |

Supplemental Table 3

| TIGR   | ASTRA   | Gene Name   | Gene Description                                                                      | 10700(SS1 premouse) <sup>a</sup> | G27/NSH 57 | NSH79 | SS1 |
|--------|---------|-------------|---------------------------------------------------------------------------------------|----------------------------------|------------|-------|-----|
| HP0691 | JHP0637 | yxjD, scoA  | 3-oxoadipate coA-transferase subunit A , 3-OXOACID COA-TRANSFERASE, SUBUNIT A         | 1                                | 1          | 1     | 1   |
| HP0693 | JHP0635 | atoE        | conserved hypothetical integral membrane protein, short-chain fatty acids transporter | 1                                | 1          | 1     | 1   |
| HP0694 | JHP0634 |             | putative Outer membrane protein                                                       | 1                                | 1          | 1     | 1   |
| HP0695 | JHP0633 | hyuA        | hydantoin utilization protein A , putative HYDANTOIN UTILIZATION                      | 1                                | 1          | 1     | 1   |
| HP0696 | JHP0632 |             | N-methylhydantoinase, putative HYDANTOIN UTILIZATION                                  | 1                                | 1          | 1     | 1   |
| HP0697 | JHP0631 |             |                                                                                       | 1                                | 1          | 1     | 1   |
| HP0699 | JHP0639 |             |                                                                                       | 1                                | 1          | 1     | 1   |
| HP0700 | JHP0640 | dgkA        | diacylglycerol kinase                                                                 | 1                                | 1          | 1     | 0   |
| HP0701 | JHP0641 | gyrA        | DNA gyrase, sub A , DNA GYRASE SUBUNIT A                                              | 1                                | 1          | 1     | 1   |
| HP0702 | JHP0642 |             |                                                                                       | 1                                | 1          | 1     | 1   |
| HP0703 | JHP0643 |             | response regulator, putative TRANSCRIPTIONAL REGULATOR                                | 1                                | 1          | 1     | 1   |
| HP0706 | JHP0645 | omp15, hopE | outer membrane protein , Outer membrane protein/porin                                 | 1                                | 1          | 1     | 1   |
| HP0707 | JHP0646 |             | conserved hypothetical protein                                                        | 1                                | 1          | 1     | 1   |
| HP0708 | JHP0647 |             |                                                                                       | 1                                | 1          | 1     | 1   |
| HP0709 | JHP0648 |             | conserved hypothetical protein                                                        | 1                                | 1          | 1     | 1   |
| HP0710 | JHP0649 |             | conserved hypothetical protein, putative Outer membrane protein                       | 1                                | 1          | 1     | 1   |
| HP0711 | JHP0650 |             |                                                                                       | 1                                | 1          | 1     | 1   |
| HP0712 | JHP0651 |             |                                                                                       | 1                                | 1          | 0     | 1   |
| HP0713 | JHP0651 |             |                                                                                       | 1                                | 1          | 0     | 1   |
| HP0714 | JHP0652 | rpoN        | RNA polymerase sigma-54 factor                                                        | 1                                | 1          | 1     | 1   |

Supplemental Table 3

| TIGR   | ASTRA   | Gene Name | Gene Description                                                                         | 10700(SS1 premouse) <sup>a</sup> | G27/NSH 57 | NSH79 | SS1 |
|--------|---------|-----------|------------------------------------------------------------------------------------------|----------------------------------|------------|-------|-----|
| HP0715 | JHP0653 |           | ABC transporter, ATP-binding protein, putative abc transporter, ATP-binding protein      | 1                                | 1          | 1     | 1   |
| HP0716 | JHP0654 |           | conserved hypothetical protein                                                           | 1                                | 1          | 1     | 1   |
| HP0717 | JHP0655 | dnaX      | DNA polymerase III gamma and tau subunits , DNA POLYMERASE III SUBUNITS GAMMA AND TAU    | 1                                | 1          | 1     | 1   |
| HP0718 | JHP0656 |           | conserved hypothetical integral membrane protein                                         | 1                                | 1          | 1     | 1   |
| HP0719 | JHP0657 |           |                                                                                          | 1                                | 1          | 1     | 1   |
| HP0720 | JHP0657 |           |                                                                                          | 1                                | 1          | 1     | 1   |
| HP0721 | JHP0658 |           |                                                                                          | 1                                | 1          | 1     | 1   |
| HP0722 | JHP0659 |           | putative Outer membrane protein                                                          | 0                                | 1          | 0     | 0   |
| HP0723 | JHP0661 | ansB      | L-asparaginase II                                                                        | 1                                | 1          | 1     | 1   |
| HP0725 | JHP0662 |           | putative Outer membrane protein                                                          | 0                                | 1          | 1     | 0   |
| HP0726 | JHP0663 |           | putative Outer membrane protein                                                          | 1                                | 1          | 1     | 1   |
| HP0727 | JHP0664 |           | transcriptional regulator, putative, putative TRANSCRIPTIONAL REGULATOR                  | 1                                | 1          | 1     | 1   |
| HP0728 | JHP0665 |           | conserved hypothetical protein                                                           | 1                                | 1          | 1     | 1   |
| HP0729 | JHP0666 |           |                                                                                          | 1                                | 1          | 1     | 1   |
| HP0730 | JHP0667 |           |                                                                                          | 0                                | 1          | 1     | 1   |
| HP0731 | JHP0668 |           |                                                                                          | 1                                | 1          | 1     | 1   |
| HP0733 | JHP0670 |           |                                                                                          | 1                                | 1          | 0     | 0   |
| HP0734 | JHP0671 |           | conserved hypothetical protein                                                           | 1                                | 1          | 1     | 1   |
| HP0735 | JHP0672 | gpt       | xanthine guanine phosphoribosyl transferase , XANTHINE-GUANINE PHOSPHORIBOSYLTRANSFERASE | 1                                | 1          | 1     | 1   |

Supplemental Table 3

| TIGR   | ASTRA   | Gene Name    | Gene Description                                                                   | 10700(SS1 premouse) <sup>a</sup> | G27/NSH 57 | NSH79 | SS1 |
|--------|---------|--------------|------------------------------------------------------------------------------------|----------------------------------|------------|-------|-----|
| HP0737 | JHP0674 | pgpA         | conserved hypothetical integral membrane protein, PHOSPHATIDYLGLYCEROPHOSPHATASE A | 1                                | 1          | 1     | 1   |
| HP0738 | JHP0675 | ddlA, ddl    | D-alanine:D-alanine ligase A , D-ALANINE--D-ALANINE LIGASE                         | 1                                | 1          | 1     | 1   |
| HP0739 | JHP0676 |              | 2-hydroxy-6-oxohepta-2,4-dienoate hydrolase                                        | 1                                | 1          | 1     | 1   |
| HP0740 | JHP0677 | murF         | UDP-MurNac-pentapeptide presynthetase , D-ALANYL-D-ALANINE-ADDING ENZYME           | 1                                | 1          | 1     | 1   |
| HP0741 | JHP0678 |              | conserved hypothetical protein, HIT FAMILY PROTEIN                                 | 1                                | 1          | 1     | 1   |
| HP0742 | JHP0679 | prsA         | phosphoribosylpyrophosphate synthetase , PHOSPHORIBOSYL PYROPHOSPHATE SYNTHETASE   | 1                                | 1          | 1     | 1   |
| HP0743 | JHP0680 | mreB, rodA_1 | rod shape-determining protein , putative ROD SHAPE-DETERMINING PROTEIN             | 1                                | 1          | 1     | 1   |
| HP0744 | JHP0681 |              |                                                                                    | 0                                | 1          | 1     | 1   |
| HP0745 | JHP0682 |              | conserved hypothetical protein                                                     | 1                                | 1          | 1     | 1   |
| HP0746 | JHP0683 |              |                                                                                    | 1                                | 1          | 1     | 1   |
| HP0747 | JHP0684 |              | conserved hypothetical protein                                                     | 1                                | 1          | 1     | 1   |
| HP0748 | JHP0685 | ftsE         | cell division protein , putative abc transporter, ATP-binding protein              | 1                                | 1          | 1     | 1   |
| HP0749 | JHP0686 | ftsX         | cell division membrane protein                                                     | 1                                | 1          | 1     | 1   |
| HP0750 | JHP0687 |              |                                                                                    | 1                                | 1          | 1     | 1   |
| HP0751 | JHP0688 | flaG         | polar flagellin , putative FLAGELLIN PROTEIN                                       | 1                                | 1          | 1     | 1   |

Supplemental Table 3

| TIGR   | ASTRA   | Gene Name    | Gene Description                                                                          | 10700(SS1 premouse) <sup>a</sup> | G27/NSH 57 | NSH79 | SS1 |
|--------|---------|--------------|-------------------------------------------------------------------------------------------|----------------------------------|------------|-------|-----|
| HP0752 | JHP0689 | fliD         | flagellar hook-associated protein 2 , putative FLAGELLAR HOOK-ASSOCIATED PROTEIN 2 (HAP2) | 1                                | 1          | 1     | 1   |
| HP0753 | JHP0690 | fliS         | flagellar protein , putative FLAGELLAR PROTEIN                                            | 1                                | 1          | 1     | 1   |
| HP0754 | JHP0691 |              |                                                                                           | 1                                | 1          | 1     | 1   |
| HP0755 | JHP0692 | moeB         | molybdopterin biosynthesis protein                                                        | 1                                | 1          | 1     | 1   |
| HP0756 | JHP0693 |              |                                                                                           | 1                                | 1          | 1     | 1   |
| HP0757 | JHP0694 |              | beta-alanine synthetase homolog                                                           | 1                                | 1          | 1     | 1   |
| HP0758 | JHP0695 |              | conserved hypothetical integral membrane protein                                          | 1                                | 1          | 1     | 1   |
| HP0759 | JHP0696 |              | conserved hypothetical integral membrane protein                                          | 1                                | 1          | 1     | 1   |
| HP0760 | JHP0697 |              | conserved hypothetical protein                                                            | 1                                | 1          | 1     | 1   |
| HP0761 | JHP0698 |              |                                                                                           | 1                                | 1          | 1     | 1   |
| HP0762 | JHP0699 |              |                                                                                           | 1                                | 1          | 1     | 1   |
| HP0763 | JHP0700 | ftsY         | cell division protein , FUNCTIONAL HOMOLOG OF SRP RECEPTOR                                | 1                                | 1          | 1     | 1   |
| HP0764 | JHP0701 |              |                                                                                           | 1                                | 1          | 1     | 1   |
| HP0765 | JHP0702 |              |                                                                                           | 0                                | 0          | 0     | 0   |
| HP0768 | JHP0705 | moaA         | molybdenum cofactor biosynthesis protein A , MOLYBDOPTERIN COFACTOR BIOSYNTHETIC PROTEIN  | 1                                | 1          | 1     | 1   |
| HP0769 | JHP0706 | mobA         | molybdopterin-guanine dinucleotide biosynthesis protein A                                 | 1                                | 1          | 1     | 1   |
| HP0770 | JHP0707 | flhB, flhB_1 | flagellar biosynthetic protein , FLAGELLAR BIOSYNTHESIS PROTEIN                           | 1                                | 1          | 1     | 1   |
| HP0771 | JHP0708 |              |                                                                                           | 1                                | 1          | 1     | 1   |
| HP0773 | JHP0710 |              |                                                                                           | 1                                | 1          | 1     | 1   |

Supplemental Table 3

| TIGR   | ASTRA   | Gene Name  | Gene Description                                                                                             | 10700(SS1 premouse) <sup>a</sup> | G27/NSH 57 | NSH79 | SS1 |
|--------|---------|------------|--------------------------------------------------------------------------------------------------------------|----------------------------------|------------|-------|-----|
| HP0774 | JHP0711 | tyrS       | tyrosyl-tRNA synthetase                                                                                      | 1                                | 1          | 1     | 1   |
| HP0775 | JHP0712 | spoT       | penta-phosphate guanosine-3'-pyrophosphohydrolase , GUANOSINE-3',5'-BIS(DIPHOSPHATE) 3'-PYROPHOSPHOHYDROLASE | 1                                | 1          | 1     | 1   |
| HP0776 | JHP0713 |            |                                                                                                              | 1                                | 1          | 1     | 1   |
| HP0777 | JHP0714 | pyrH       | uridine 5'-monophosphate (UMP) kinase, URIDYLATE KINASE                                                      | 1                                | 1          | 1     | 1   |
| HP0778 | JHP0715 |            |                                                                                                              | 1                                | 1          | 1     | 1   |
| HP0780 | JHP0717 |            |                                                                                                              | 1                                | 1          | 1     | 1   |
| HP0781 | JHP0718 |            |                                                                                                              | 1                                | 1          | 1     | 1   |
| HP0782 | JHP0719 |            | putative Outer membrane protein                                                                              | 1                                | 1          | 1     | 1   |
| HP0783 | JHP0720 |            |                                                                                                              | 1                                | 1          | 1     | 1   |
| HP0785 | JHP0722 |            | conserved hypothetical secreted protein                                                                      | 1                                | 1          | 1     | 1   |
| HP0787 | JHP0724 |            | conserved hypothetical integral membrane protein                                                             | 1                                | 1          | 1     | 1   |
| HP0788 | JHP0725 |            | putative Outer membrane protein                                                                              | 1                                | 1          | 1     | 1   |
| HP0789 | N/A     |            |                                                                                                              | 0                                | 1          | 1     | 0   |
| HP0790 | N/A     | prfB       | anti-codon nuclease masking agent                                                                            | 0                                | 1          | 1     | 0   |
| HP0791 | JHP0727 | cadA, hmcT | cadmium-transporting ATPase, P-type , putative HEAVY-METAL CATION-TRANSPORTING P-TYPE ATPASE                 | 1                                | 1          | 1     | 1   |
| HP0792 | JHP0728 |            | sigma-54 interacting protein                                                                                 | 1                                | 1          | 1     | 1   |
| HP0793 | JHP0729 | def        | polypeptide deformylase                                                                                      | 1                                | 1          | 1     | 1   |
| HP0794 | JHP0730 | clpP       | ATP-dependent clp protease proteolytic component , ATP-DEPENDENT PROTEASE, PROTEOLYTIC SUBUNIT               | 1                                | 1          | 1     | 1   |
| HP0795 | JHP0731 | tig        | trigger factor                                                                                               | 1                                | 1          | 1     | 1   |



Supplemental Table 3

| TIGR   | ASTRA   | Gene Name         | Gene Description                                                                                                                          | 10700(SS1 premouse) <sup>a</sup> | G27/NSH 57 | NSH79 | SS1 |
|--------|---------|-------------------|-------------------------------------------------------------------------------------------------------------------------------------------|----------------------------------|------------|-------|-----|
| HP0796 | JHP0732 | omp18             | outer membrane protein , putative Outer membrane protein                                                                                  | 1                                | 1          | 1     | 1   |
| HP0797 | JHP0733 | hpaA              | flagellar sheath adhesin hpaA, NEURAMINYLLACTOSE-BINDING HEMAGGLUTININ PRECURSOR                                                          | 1                                | 1          | 1     | 1   |
| HP0798 | JHP0734 | moaC              | molybdenum cofactor biosynthesis protein C                                                                                                | 1                                | 1          | 1     | 1   |
| HP0799 | JHP0735 | mog               | molybdopterin biosynthesis protein                                                                                                        | 1                                | 1          | 1     | 1   |
| HP0800 | JHP0736 | moaE              | molybdopterin converting factor, subunit 2                                                                                                | 1                                | 1          | 1     | 1   |
| HP0801 | JHP0737 | moaD              | molybdopterin converting factor, subunit 1 , putative MOLYBDOPTERIN CONVERTING FACTOR, SUBUNIT 1                                          | 1                                | 1          | 1     | 1   |
| HP0802 | JHP0738 | ribA              | GTP cyclohydrolase II                                                                                                                     | 1                                | 1          | 1     | 1   |
| HP0803 | JHP0739 |                   |                                                                                                                                           | 1                                | 1          | 1     | 1   |
| HP0804 | JHP0740 | ribA, ribB, ribBA | GTP cyclohydrolase II/3,4-dihydroxy-2-butanone 4-phosphate synthase , GTP CYCLOHYDROLASE II/3,4-DIHYDROXY-2-BUTANONE 4-PHOSPHATE SYNTHASE | 1                                | 1          | 1     | 1   |
| HP0805 | JHP0741 | lex2B             | lipooligosaccharide 5G8 epitope biosynthesis-associated protein , putative lipopolysaccharide biosynthesis protein                        | 1                                | 1          | 1     | 1   |
| HP0806 | JHP0742 |                   |                                                                                                                                           | 1                                | 1          | 1     | 1   |
| HP0807 | JHP0743 | fecA, fecA_2      | iron(III) dicitrate transport protein                                                                                                     | 1                                | 1          | 1     | 1   |

Supplemental Table 3

| TIGR   | ASTRA              | Gene Name    | Gene Description                                                                                                   | 10700(SS1 premouse) <sup>a</sup> | G27/NSH 57 | NSH79 | SS1 |
|--------|--------------------|--------------|--------------------------------------------------------------------------------------------------------------------|----------------------------------|------------|-------|-----|
| HP0808 | JHP0744            | acpS         | holo-acp synthase , HOLO-ACYL CARRIER PROTEIN SYNTHASE                                                             | 1                                | 1          | 1     | 1   |
| HP0810 | JHP0746            |              | conserved hypothetical protein                                                                                     | 1                                | 1          | 1     | 1   |
| HP0812 | JHP0748            |              |                                                                                                                    | 1                                | 1          | 1     | 1   |
| HP0813 | JHP0749            |              | conserved hypothetical protein                                                                                     | 1                                | 1          | 1     | 1   |
| HP0814 | JHP0750            | thiF, moeB   | thiamin biosynthesis protein , MOLYBDOPTERIN-SYNTHASE SULFURYLASE                                                  | 1                                | 1          | 1     | 1   |
| HP0816 | JHP0752            | motB         | flagellar motor rotation protein , FLAGELLAR MOTOR PROTEIN                                                         | 1                                | 1          | 1     | 1   |
| HP0817 | JHP0753            |              |                                                                                                                    | 1                                | 1          | 1     | 1   |
| HP0818 | JHP0754<br>JHP0757 | proWX        | osmoprotection protein                                                                                             | 1                                | 1          | 1     | 1   |
| HP0819 | JHP0758            | proV         | osmoprotection protein , osmoprotection ATP-binding protein                                                        | 1                                | 1          | 1     | 1   |
| HP0820 | JHP0759            |              |                                                                                                                    | 1                                | 1          | 1     | 1   |
| HP0821 | JHP0760            | uvrC         | excinuclease ABC subunit C                                                                                         | 1                                | 1          | 1     | 1   |
| HP0822 | JHP0761            | metL, hom    | homoserine dehydrogenase                                                                                           | 1                                | 1          | 1     | 1   |
| HP0823 | JHP0762            |              | conserved hypothetical protein                                                                                     | 1                                | 1          | 1     | 1   |
| HP0824 | JHP0763            | trxA         | thioredoxin                                                                                                        | 1                                | 1          | 1     | 1   |
| HP0825 | JHP0764            | trxB, trxB_1 | thioredoxin reductase                                                                                              | 1                                | 1          | 1     | 1   |
| HP0826 | JHP0765            | lex2B        | lipooligosaccharide 5G8 epitope biosynthesis-associated protein , putative lipopolysaccharide biosynthesis protein | 1                                | 1          | 1     | 1   |
| HP0827 | JHP0766            |              | ss-DNA binding protein 12RNP2 precursor                                                                            | 1                                | 1          | 1     | 1   |
| HP0828 | JHP0767            | atpB         | ATP synthase F0, subunit a                                                                                         | 1                                | 1          | 1     | 1   |
| HP0829 | JHP0768            | guaB         | inosine-5'-monophosphate dehydrogenase                                                                             | 1                                | 1          | 1     | 1   |

Supplemental Table 3

| TIGR   | ASTRA   | Gene Name  | Gene Description                                                                                       | 10700(SS1 premouse) <sup>a</sup> | G27/NSH 57 | NSH79 | SS1 |
|--------|---------|------------|--------------------------------------------------------------------------------------------------------|----------------------------------|------------|-------|-----|
| HP0830 | JHP0769 | gatA       | Glu-tRNA(Gln) amidotransferase, subunit A , GLU-TRNA AMIDOTRANSFERASE, SUBUNIT A                       | 1                                | 1          | 1     | 1   |
| HP0831 | JHP0770 |            | conserved hypothetical ATP binding protein                                                             | 1                                | 1          | 1     | 1   |
| HP0832 | JHP0771 | speE       | spermidine synthase , putative spermidine synthase                                                     | 1                                | 1          | 1     | 1   |
| HP0833 | JHP0772 |            |                                                                                                        | 1                                | 1          | 1     | 1   |
| HP0834 | JHP0773 | yphC       | GTP-binding protein homologue                                                                          | 1                                | 1          | 1     | 1   |
| HP0835 | JHP0774 | hup        | histone-like DNA-binding protein HU , DNA-BINDING PROTEIN HU                                           | 1                                | 1          | 1     | 1   |
| HP0836 | JHP0775 |            |                                                                                                        | 1                                | 1          | 1     | 1   |
| HP0838 | JHP0776 |            |                                                                                                        | 1                                | 1          | 1     | 1   |
| HP0839 | JHP0777 | ompP1      | outer membrane protein P1 , putative Outer membrane protein                                            | 1                                | 1          | 1     | 1   |
| HP0840 | JHP0778 |            | flaA1 protein, putative SUGAR NUCLEOTIDE BIOSYNTHESIS PROTEIN                                          | 1                                | 1          | 1     | 1   |
| HP0841 | JHP0779 | dfp        | pantothenate metabolism flavoprotein                                                                   | 1                                | 1          | 1     | 1   |
| HP0842 | JHP0780 |            |                                                                                                        | 1                                | 1          | 1     | 1   |
| HP0843 | JHP0781 | thiB, thiE | thiamin phosphate pyrophosphorylase/hydroxyethylthiazole kinase , THIAMINE PHOSPHATE PYROPHOSPHORYLASE | 1                                | 1          | 1     | 1   |
| HP0844 | JHP0782 | thi, thiD  | thiamine biosynthesis protein , PHOSPHOMETHYL PYRIMIDINE KINASE                                        | 1                                | 1          | 1     | 1   |

Supplemental Table 3

| TIGR   | ASTRA   | Gene Name       | Gene Description                                                                               | 10700(SS1 premouse) <sup>a</sup> | G27/NSH 57 | NSH79 | SS1 |
|--------|---------|-----------------|------------------------------------------------------------------------------------------------|----------------------------------|------------|-------|-----|
| HP0845 | JHP0783 | thiM            | thiamin phosphate pyrophosphorylase/hydroxyethylthiazole kinase<br>HYDROXYETHYLTHIAZOLE KINASE | 1                                | 1          | 1     | 1   |
| HP0846 | JHP0784 | hsdR,<br>hsdR_2 | type I restriction enzyme R protein ,<br>TYPE I RESTRICTION ENZYME (RESTRICTION SUBUNIT)       | 1                                | 1          | 1     | 1   |
| HP0848 | JHP0785 | hsdS,<br>hsdS_2 | type I restriction enzyme S protein ,<br>TYPE I RESTRICTION ENZYME (SPECIFICITY SUBUNIT)       | 0                                | 0          | 0     | 0   |
| HP0849 | JHP0785 |                 |                                                                                                | 0                                | 1          | 0     | 1   |
| HP0850 | JHP0786 | hsdM,<br>hsdM_2 | type I restriction enzyme M protein ,<br>TYPE I RESTRICTION ENZYME (MODIFICATION SUBUNIT)      | 1                                | 1          | 1     | 1   |
| HP0851 | JHP0787 |                 | conserved hypothetical integral membrane protein                                               | 1                                | 1          | 1     | 1   |
| HP0852 | JHP0788 |                 |                                                                                                | 1                                | 1          | 1     | 1   |
| HP0853 | JHP0789 | yheS            | ABC transporter, ATP-binding protein ,<br>putative abc transporter, ATP-binding protein        | 1                                | 1          | 1     | 1   |
| HP0854 | JHP0790 | guaC            | GMP reductase                                                                                  | 1                                | 1          | 1     | 1   |
| HP0856 | N/A     |                 |                                                                                                | 0                                | 0          | 0     | 0   |
| HP0857 | JHP0791 | gmhA            | phosphoheptose isomerase                                                                       | 1                                | 1          | 1     | 1   |
| HP0858 | JHP0792 | rfaE,<br>waaE   | ADP-heptose synthase ,<br>putative ADP-D-glycero-D-mannoheptose synthase                       | 1                                | 1          | 1     | 1   |
| HP0859 | JHP0793 | rfaD,<br>gmhD   | ADP-L-glycero-D-mannoheptose-6-epimerase                                                       | 1                                | 1          | 1     | 1   |
| HP0860 | JHP0794 |                 | conserved hypothetical protein                                                                 | 1                                | 1          | 1     | 1   |

Supplemental Table 3

| TIGR   | ASTRA   | Gene Name    | Gene Description                                                                                    | 10700(SS1 premouse) <sup>a</sup> | G27/NSH 57 | NSH79 | SS1 |
|--------|---------|--------------|-----------------------------------------------------------------------------------------------------|----------------------------------|------------|-------|-----|
| HP0861 | JHP0795 |              |                                                                                                     | 1                                | 1          | 1     | 1   |
| HP0862 | JHP0796 |              |                                                                                                     | 1                                | 1          | 1     | 1   |
| HP0863 | JHP0797 |              |                                                                                                     | 1                                | 1          | 1     | 1   |
| HP0864 | JHP0798 |              |                                                                                                     | 1                                | 1          | 1     | 1   |
| HP0865 | JHP0799 | dut          | deoxyuridine 5'-triphosphate nucleotidohydrolase                                                    | 1                                | 1          | 1     | 1   |
| HP0866 | JHP0800 | greA         | transcription elongation factor GreA , TRANSCRIPTION ELONGATION FACTOR (TRANSCRIPT CLEAVAGE FACTOR) | 1                                | 1          | 1     | 1   |
| HP0867 | JHP0801 | lpxB         | lipid A disaccharide synthetase , LIPID-A-DISACCHARIDE SYNTHASE                                     | 1                                | 1          | 1     | 1   |
| HP0868 | JHP0802 |              |                                                                                                     | 1                                | 1          | 1     | 1   |
| HP0869 | JHP0803 | hypA         | hydrogenase expression/formation protein                                                            | 1                                | 1          | 1     | 1   |
| HP0870 | JHP0804 | flgE         | flagellar hook , FLAGELLAR HOOK PROTEIN                                                             | 1                                | 1          | 1     | 1   |
| HP0871 | JHP0805 | cdh          | CDP-diglyceride hydrolase , CDP-DIACYLGLYCEROL PYROPHOSPHATASE                                      | 1                                | 1          | 1     | 1   |
| HP0872 | JHP0806 | phnA         | alkylphosphonate uptake protein , putative ALKYLPHOSPHONATE UPTAKE PROTEIN                          | 1                                | 1          | 1     | 1   |
| HP0873 | JHP0807 |              |                                                                                                     | 1                                | 1          | 1     | 1   |
| HP0874 | JHP0808 |              |                                                                                                     | 1                                | 1          | 1     | 1   |
| HP0875 | JHP0809 | katA         | catalase                                                                                            | 1                                | 1          | 1     | 1   |
| HP0876 | JHP0810 | frpB, frpB_1 | iron-regulated outer membrane protein , putative IRON-REGULATED OUTER MEMBRANE PROTEIN              | 1                                | 1          | 1     | 1   |
| HP0878 | JHP0812 |              |                                                                                                     | 1                                | 1          | 1     | 1   |
| HP0879 | JHP0812 |              |                                                                                                     | 1                                | 1          | 1     | 1   |
| HP0882 | N/A     |              |                                                                                                     | 0                                | 0          | 0     | 1   |

Supplemental Table 3

| TIGR   | ASTRA   | Gene Name   | Gene Description                                                                                                   | 10700(SS1 premouse) <sup>a</sup> | G27/NSH 57 | NSH79 | SS1 |
|--------|---------|-------------|--------------------------------------------------------------------------------------------------------------------|----------------------------------|------------|-------|-----|
| HP0883 | JHP0815 | ruvA        | Holliday junction DNA helicase                                                                                     | 1                                | 1          | 1     | 1   |
| HP0884 | JHP0816 |             |                                                                                                                    | 1                                | 1          | 1     | 1   |
| HP0885 | JHP0817 | mviN        | virulence factor mviN protein                                                                                      | 1                                | 1          | 1     | 1   |
| HP0886 | JHP0818 | cysS        | cysteinyl-tRNA synthetase                                                                                          | 1                                | 1          | 1     | 1   |
| HP0888 | JHP0821 | fecE        | iron(III) dicitrate ABC transporter, ATP-binding protein, IRON(III) DICITRATE TRANSPORT SYSTEM ATP-BINDING PROTEIN | 1                                | 1          | 1     | 1   |
| HP0889 | JHP0822 | fecD        | iron(III) dicitrate ABC transporter, permease protein , IRON(III) DICITRATE TRANSPORT SYSTEM PERMEASE PROTEIN      | 1                                | 1          | 1     | 1   |
| HP0890 | JHP0823 |             | conserved hypothetical protein                                                                                     | 1                                | 1          | 1     | 1   |
| HP0891 | JHP0824 |             | conserved hypothetical protein                                                                                     | 1                                | 1          | 1     | 1   |
| HP0892 | JHP0831 |             | conserved hypothetical protein                                                                                     | 1                                | 1          | 1     | 1   |
| HP0893 | JHP0832 |             |                                                                                                                    | 1                                | 1          | 1     | 1   |
| HP0895 | N/A     |             |                                                                                                                    | 1                                | 1          | 1     | 1   |
| HP0896 | JHP1164 | omp19, babB | outer membrane protein , outer membrane protein - adhesin                                                          | 1                                | 1          | 1     | 1   |
| HP0897 | N/A     |             |                                                                                                                    | 1                                | 1          | 1     | 1   |
| HP0898 | JHP0835 | hypD        | hydrogenase expression/formation protein                                                                           | 1                                | 1          | 1     | 1   |
| HP0899 | JHP0836 | hypC        | hydrogenase expression/formation protein                                                                           | 1                                | 1          | 1     | 1   |
| HP0900 | JHP0837 | hypB        | hydrogenase expression/formation protein                                                                           | 1                                | 1          | 1     | 1   |
| HP0902 | JHP0839 |             |                                                                                                                    | 1                                | 1          | 1     | 1   |
| HP0903 | JHP0840 | ackA        | ACETATE KINASE                                                                                                     | 1                                | 0          | 1     | 1   |
| HP0904 | JHP0841 | pta         | PHOSPHOTRANSAC ETYLASE                                                                                             | 1                                | 0          | 1     | 1   |

Supplemental Table 3

| TIGR   | ASTRA   | Gene Name    | Gene Description                                                                             | 10700(SS1 premouse) <sup>a</sup> | G27/NSH 57 | NSH79 | SS1 |
|--------|---------|--------------|----------------------------------------------------------------------------------------------|----------------------------------|------------|-------|-----|
| HP0908 | JHP0844 | flgE         | flagellar hook , putative FLAGELLAR BASAL-BODY/ROD/HOOKPROTEIN                               | 1                                | 1          | 1     | 1   |
| HP0909 | JHP0845 |              |                                                                                              | 1                                | 1          | 1     | 0   |
| HP0910 | JHP0846 | HINDIIM      | adenine specific DNA methyltransferase , TYPE II DNA MODIFICATION ENZYME (METHYLTRANSFERASE) | 1                                | 1          | 1     | 1   |
| HP0911 | JHP0847 | rep          | rep helicase, single-stranded DNA-dependent ATPase , putative ATP-DEPENDENT HELICASE         | 1                                | 1          | 1     | 1   |
| HP0912 | JHP0848 | omp20, hopC  | outer membrane protein , Outer membrane protein/porin                                        | 1                                | 1          | 1     | 1   |
| HP0913 | JHP0849 | omp21, hopB  | outer membrane protein , Outer membrane protein/porin                                        | 1                                | 1          | 1     | 1   |
| HP0914 | JHP0850 |              | putative Outer membrane protein                                                              | 1                                | 1          | 1     | 1   |
| HP0915 | JHP0851 | frpB, frpB_2 | iron-regulated outer membrane protein , putative IRON-REGULATED OUTER MEMBRANE PROTEIN       | 1                                | 1          | 1     | 1   |
| HP0916 | JHP0851 | frpB         | iron-regulated outer membrane protein                                                        | 1                                | 1          | 1     | 1   |
| HP0920 | JHP0854 |              | conserved hypothetical integral membrane protein                                             | 1                                | 1          | 1     | 1   |
| HP0921 | JHP0855 | gap, gap_1   | glyceraldehyde-3-phosphate dehydrogenase , GLYCERALDEHYDE 3 PHOSPHATE DEHYDROGENASE          | 1                                | 1          | 1     | 1   |
| HP0923 | JHP0857 | omp22        | outer membrane protein , putative Outer membrane protein                                     | 1                                | 1          | 1     | 1   |

Supplemental Table 3

| TIGR   | ASTRA            | Gene Name | Gene Description                                                                                                         | 10700(SS1 premouse) <sup>a</sup> | G27/NSH 57 | NSH79 | SS1 |
|--------|------------------|-----------|--------------------------------------------------------------------------------------------------------------------------|----------------------------------|------------|-------|-----|
| HP0924 | JHP0858          | dmpI      | 4-oxalocrotonate tautomerase                                                                                             | 1                                | 1          | 1     | 1   |
| HP0925 | JHP0859          | recR      | recombinational DNA repair protein , RECOMBINATION PROTEIN                                                               | 1                                | 1          | 1     | 1   |
| HP0926 | JHP0860          |           | conserved hypothetical protein                                                                                           | 1                                | 1          | 1     | 1   |
| HP0928 | JHP062<br>JHP063 | foIE      | GTP cyclohydrolase I                                                                                                     | 1                                | 1          | 1     | 1   |
| HP0929 | JHP0864          | ispA      | geranyltranstransferase                                                                                                  | 1                                | 1          | 1     | 1   |
| HP0930 | JHP0865          | surE      | stationary-phase survival protein , STATIONARY PHASE PROTEIN                                                             | 1                                | 1          | 1     | 1   |
| HP0931 | JHP0866          |           |                                                                                                                          | 1                                | 1          | 1     | 1   |
| HP0932 | JHP0866          |           |                                                                                                                          | 1                                | 1          | 1     | 1   |
| HP0933 | JHP0867          |           |                                                                                                                          | 1                                | 1          | 1     | 1   |
| HP0934 | JHP0868          |           | conserved hypothetical protein                                                                                           | 1                                | 1          | 1     | 1   |
| HP0935 | JHP0869          |           |                                                                                                                          | 1                                | 1          | 1     | 1   |
| HP0936 | JHP0871          | proP      | proline/betaine transporter                                                                                              | 1                                | 1          | 1     | 1   |
| HP0937 | JHP0872          |           |                                                                                                                          | 1                                | 1          | 1     | 1   |
| HP0939 | JHP0874          | yckJ      | amino acid ABC transporter, permease protein , putative AMINO ACID ABC TRANSPORTER, PERMEASE PROTEIN                     | 1                                | 1          | 1     | 1   |
| HP0940 | JHP0875          | yckK      | amino acid ABC transporter, periplasmic binding protein , putative AMINO ACID ABC TRANSPORTER, BINDING PROTEIN PRECURSOR | 1                                | 1          | 1     | 1   |
| HP0942 | JHP0877          | dagA      | D-alanine glycine permease , putative SODIUM/ALANINE SYMPORTER                                                           | 1                                | 1          | 1     | 1   |
| HP0943 | JHP0878          | dadA      | D-amino acid dehydrogenase                                                                                               | 1                                | 1          | 1     | 1   |
| HP0944 | JHP0879          |           | conserved hypothetical protein                                                                                           | 1                                | 1          | 1     | 1   |
| HP0945 | N/A              |           |                                                                                                                          | 0                                | 0          | 0     | 0   |



Supplemental Table 3

| TIGR   | ASTRA   | Gene Name  | Gene Description                                                                                 | 10700(SS1 premouse) <sup>a</sup> | G27/NSH 57 | NSH79 | SS1 |
|--------|---------|------------|--------------------------------------------------------------------------------------------------|----------------------------------|------------|-------|-----|
| HP0946 | JHP0880 |            | conserved hypothetical integral membrane protein                                                 | 1                                | 1          | 1     | 1   |
| HP0947 | JHP0881 |            |                                                                                                  | 1                                | 1          | 1     | 1   |
| HP0948 | JHP0882 |            |                                                                                                  | 1                                | 1          | 1     | 1   |
| HP0949 | JHP0883 |            | conserved hypothetical secreted protein                                                          | 1                                | 1          | 1     | 1   |
| HP0950 | JHP0884 | accD       | acetyl-CoA carboxylase beta subunit , ACETYL-COENZYME A CARBOXYLASE SUBUNIT B                    | 1                                | 1          | 1     | 1   |
| HP0951 | JHP0885 |            |                                                                                                  | 1                                | 1          | 1     | 1   |
| HP0952 | JHP0886 |            | conserved hypothetical integral membrane protein                                                 | 1                                | 1          | 1     | 1   |
| HP0954 | JHP0888 |            | oxygen-insensitive NAD(P)H nitroreductase, putative aldehyde dehydrogenase                       | 1                                | 1          | 1     | 1   |
| HP0955 | JHP0889 | lgt        | prolipoprotein diacylglycerol transferase , putative PROLIPOPROTEIN DIACYLGLYCERYL TRANSFERASE   | 1                                | 1          | 1     | 1   |
| HP0956 | JHP0890 |            | conserved hypothetical protein                                                                   | 1                                | 1          | 1     | 1   |
| HP0957 | JHP0891 | kdtA, waaA | 3-deoxy-d-manno-octulosonic-acid transferase                                                     | 1                                | 1          | 1     | 1   |
| HP0958 | JHP0892 |            |                                                                                                  | 1                                | 1          | 1     | 1   |
| HP0959 | JHP0893 |            | conserved hypothetical protein                                                                   | 1                                | 1          | 1     | 1   |
| HP0961 | JHP0895 | gpsA       | glycerol-3-phosphate dehydrogenase, NAD(P)+ dependent, GLYCEROL-3-PHOSPHATE DEHYDROGENASE (NAD+) | 1                                | 1          | 1     | 1   |
| HP0963 | JHP0897 |            |                                                                                                  | 1                                | 1          | 1     | 1   |
| HP0964 | JHP0898 |            |                                                                                                  | 1                                | 0          | 0     | 1   |
| HP0965 | JHP0899 |            |                                                                                                  | 1                                | 1          | 1     | 1   |
| HP0966 | JHP0900 |            | conserved hypothetical protein                                                                   | 1                                | 1          | 1     | 1   |
|        | JHP0901 |            |                                                                                                  |                                  |            |       |     |

Supplemental Table 3

| TIGR   | ASTRA   | Gene Name    | Gene Description                                                                       | 10700(SS1 premouse) <sup>a</sup> | G27/NSH 57 | NSH79 | SS1 |
|--------|---------|--------------|----------------------------------------------------------------------------------------|----------------------------------|------------|-------|-----|
| HP0970 | JHP0904 | nccB, czcB_1 | nickel-cobalt-cadmium resistance protein , putative cation efflux system protein       | 1                                | 1          | 1     | 1   |
| HP0971 | JHP0905 |              |                                                                                        | 1                                | 1          | 1     | 1   |
| HP0972 | JHP0906 | glyS         | glycyl-tRNA synthetase, beta subunit , GLYCYL-TRNA SYNTHETASE BETA CHAIN               | 1                                | 1          | 1     | 1   |
| HP0973 | JHP0907 |              |                                                                                        | 1                                | 1          | 1     | 1   |
| HP0974 | JHP0908 | pgm          | phosphoglycerate mutase , 2,3-BISPHOSPHOGLYCE RATE-INDEPENDENT PHOSPHOGLYCERATE MUTASE | 1                                | 1          | 1     | 1   |
| HP0975 | JHP0909 | gatC         | Glu-tRNA(Gln) amidotransferase, subunit C , GLU-TRNA AMIDOTRANSFERASE, SUBUNIT C       | 0                                | 0          | 1     | 0   |
| HP0976 | JHP0910 | bioA         | adenosylmethionine-8-amino-7-oxononanoate aminotransferase                             | 1                                | 1          | 1     | 1   |
| HP0977 | JHP0911 |              | conserved hypothetical secreted protein                                                | 1                                | 1          | 1     | 1   |
| HP0978 | JHP0912 | ftsA         | cell division protein, septum formation protein                                        | 1                                | 1          | 1     | 1   |
| HP0979 | JHP0913 | ftsZ         | cell division protein , GTPase in circumferential ring formation                       | 1                                | 1          | 1     | 1   |
| HP0980 | N/A     |              | conserved hypothetical secreted protein                                                | 1                                | 1          | 1     | 1   |
| HP0981 | N/A     | xseA         | exonuclease VII-like protein                                                           | 1                                | 1          | 1     | 1   |
| HP0982 | N/A     |              |                                                                                        | 0                                | 1          | 0     | 0   |
| HP0983 | JHP0915 |              | conserved hypothetical integral membrane protein                                       | 1                                | 1          | 1     | 1   |
| HP0988 | N/A     | tnpA         | IS605 transposase                                                                      | 0                                | 1          | 1     | 0   |
| HP0989 | N/A     | tnpB         | IS605 transposase                                                                      | 0                                | 1          | 0     | 0   |

Supplemental Table 3

| TIGR   | ASTRA   | Gene Name | Gene Description                                                          | 10700(SS1 premouse) <sup>a</sup> | G27/NSH 57 | NSH79 | SS1 |
|--------|---------|-----------|---------------------------------------------------------------------------|----------------------------------|------------|-------|-----|
| HP0990 | JHP0938 |           |                                                                           | 0                                | 0          | 0     | 0   |
| HP0991 | JHP0939 |           |                                                                           | 0                                | 0          | 0     | 0   |
| HP0994 | N/A     |           |                                                                           | 0                                | 0          | 1     | 0   |
| HP0995 | JHP0941 | xerD      | integrase/recombinase<br>,<br>INTEGRASE/RECOMBINASE (XERCD FAMILY)        | 0                                | 0          | 1     | 0   |
| HP0996 | JHP0942 |           |                                                                           | 0                                | 0          | 1     | 0   |
| HP0997 | N/A     | tnpB      | IS605 transposase                                                         | 0                                | 1          | 0     | 0   |
| HP0998 | N/A     | tnpA      | IS605 transposase                                                         | 0                                | 1          | 1     | 0   |
| HP0999 | N/A     |           |                                                                           | 0                                | 1          | 1     | 0   |
| HP1002 | N/A     |           |                                                                           | 0                                | 1          | 1     | 0   |
| HP1003 | N/A     |           |                                                                           | 0                                | 1          | 1     | 0   |
| HP1004 | N/A     |           |                                                                           | 0                                | 1          | 1     | 0   |
| HP1006 | N/A     | traG      | conjugal transfer protein                                                 | 0                                | 1          | 1     | 0   |
| HP1007 | N/A     |           |                                                                           | 0                                | 0          | 1     | 0   |
| HP1008 | N/A     |           | IS200 insertion sequence from SARA17                                      | 0                                | 0          | 1     | 0   |
| HP1009 | N/A     |           | site-specific recombinase                                                 | 0                                | 1          | 0     | 0   |
| HP1010 | JHP0413 | ppk       | polyphosphate kinase                                                      | 1                                | 1          | 1     | 1   |
| HP1011 | JHP0412 | pyrD      | dihydroorotate dehydrogenase                                              | 1                                | 1          | 1     | 1   |
| HP1012 | JHP0411 | pqqE      | protease , putative ZINC PROTEASE                                         | 1                                | 1          | 1     | 1   |
| HP1013 | JHP0410 | dapA      | dihydrodipicolinate synthetase , DIHYDRODIPICOLINATE SYNTHASE             | 1                                | 1          | 1     | 1   |
| HP1014 | JHP0409 | hdhA      | 7-alpha-hydroxysteroid dehydrogenase , putative Short chain dehydrogenase | 1                                | 1          | 1     | 1   |
| HP1015 | JHP0408 |           |                                                                           | 1                                | 1          | 1     | 1   |
| HP1016 | JHP0407 | pgsA      | phosphatidylglycerophosphate synthase                                     | 1                                | 1          | 1     | 1   |
| HP1017 | JHP0406 | rocE      | amino acid permease                                                       | 1                                | 1          | 1     | 1   |
| HP1019 | JHP0405 | htrA      | serine protease , PROTEASE DO                                             | 1                                | 1          | 1     | 1   |
| HP1020 | JHP0404 |           | conserved hypothetical protein                                            | 1                                | 1          | 1     | 1   |
| HP1021 | JHP0403 |           | response regulator, putative TRANSCRIPTIONAL REGULATOR                    | 1                                | 1          | 1     | 1   |

Supplemental Table 3

| TIGR   | ASTRA   | Gene Name    | Gene Description                                                                              | 10700(SS1 premouse) <sup>a</sup> | G27/NSH 57 | NSH79 | SS1 |
|--------|---------|--------------|-----------------------------------------------------------------------------------------------|----------------------------------|------------|-------|-----|
| HP1022 | JHP0402 |              |                                                                                               | 1                                | 1          | 1     | 1   |
| HP1024 | JHP0400 | CbpA, dnaJ_1 | co-chaperone-curved DNA binding protein A , putative co-chaperone with DnaK                   | 1                                | 1          | 1     | 1   |
| HP1025 | JHP0399 | hspR         | putative heat shock protein , putative TRANSCRIPTIONAL REGULATORY PROTEIN                     | 1                                | 1          | 1     | 1   |
| HP1027 | JHP0397 | fur          | ferric uptake regulation protein                                                              | 1                                | 1          | 1     | 1   |
| HP1028 | JHP0396 |              |                                                                                               | 1                                | 1          | 1     | 1   |
| HP1029 | JHP0395 |              |                                                                                               | 1                                | 1          | 1     | 1   |
| HP1030 | JHP0394 | fliY         | fliY protein , FLAGELLAR MOTOR SWITCH PROTEIN                                                 | 1                                | 1          | 1     | 1   |
| HP1031 | JHP0393 | fliM         | flagellar motor switch protein                                                                | 1                                | 1          | 1     | 1   |
| HP1032 | JHP0392 | fliA         | alternative transcription initiation factor, sigma-F , RNA POLYMERASE SIGMA FACTOR (sigma 28) | 1                                | 1          | 1     | 1   |
| HP1033 | JHP0391 |              |                                                                                               | 1                                | 1          | 1     | 1   |
| HP1034 | JHP0390 | ylxH         | ATP-binding protein                                                                           | 1                                | 1          | 1     | 1   |
| HP1035 | JHP0389 | flhF         | flagellar biosynthesis protein , putative FLAGELLAR BIOSYNTHESIS PROTEIN                      | 1                                | 1          | 1     | 1   |
| HP1036 | JHP0388 | folK         | 7, 8-dihydro-6-hydroxymethylpterin-pyrophosphokinase                                          | 1                                | 1          | 1     | 1   |
| HP1037 | JHP0387 | pepQ         | conserved hypothetical protein, putative proline peptidase                                    | 1                                | 1          | 1     | 1   |
| HP1038 | JHP0386 | aroQ, aroD   | 3-dehydroquinase type II , 3-DEHYDROQUINATE DEHYDRATASE                                       | 1                                | 1          | 1     | 1   |
| HP1039 | JHP0385 |              |                                                                                               | 1                                | 1          | 1     | 1   |
| HP1041 | JHP0383 | flhA         | flagellar biosynthesis protein                                                                | 1                                | 1          | 1     | 1   |
| HP1042 | JHP0382 |              |                                                                                               | 1                                | 1          | 1     | 1   |

Supplemental Table 3

| TIGR   | ASTRA   | Gene Name  | Gene Description                                                                                                | 10700(SS1 premouse) <sup>a</sup> | G27/NSH 57 | NSH79 | SS1 |
|--------|---------|------------|-----------------------------------------------------------------------------------------------------------------|----------------------------------|------------|-------|-----|
| HP1043 | JHP0381 |            | response regulator, putative<br>TRANSCRIPTIONAL REGULATOR                                                       | 1                                | 1          | 1     | 1   |
| HP1044 | JHP0380 |            | conserved hypothetical integral membrane protein                                                                | 1                                | 1          | 1     | 1   |
| HP1046 | JHP0379 |            | conserved hypothetical protein                                                                                  | 1                                | 1          | 1     | 1   |
| HP1047 | JHP0378 | rbfA       | ribosome-binding factor A , putative<br>RIBOSOME-BINDING FACTOR A                                               | 1                                | 1          | 1     | 1   |
| HP1048 | JHP0377 | infB       | translation initiation factor IF-2                                                                              | 1                                | 1          | 1     | 1   |
| HP1049 | JHP0376 |            | conserved hypothetical protein                                                                                  | 1                                | 1          | 1     | 1   |
| HP1051 | JHP0374 |            |                                                                                                                 | 1                                | 1          | 1     | 1   |
| HP1052 | JHP0373 | envA, lpxC | UDP-3-O-acyl N-acetylglucosamine deacetylase , UDP-3-O-[3-HYDROXYMYRISTOYL                                      | 1                                | 1          | 1     | 1   |
| HP1054 | JHP0371 |            |                                                                                                                 | 1                                | 1          | 1     | 1   |
| HP1055 | JHP0370 |            |                                                                                                                 | 1                                | 1          | 1     | 1   |
| HP1056 | JHP0369 |            |                                                                                                                 | 1                                | 1          | 1     | 1   |
| HP1058 | JHP0367 | panB       | 3-methyl-2-oxobutanoate hydroxymethyltransferase                                                                | 1                                | 1          | 1     | 1   |
| HP1059 | JHP0366 | ruvB       | Holliday junction DNA helicase , HOLLIDAY JUNCTION DNA HELICASE RUVB                                            | 1                                | 1          | 1     | 1   |
| HP1061 | JHP0364 |            | conserved hypothetical integral membrane protein                                                                | 1                                | 1          | 1     | 1   |
| HP1062 | JHP0363 | queA       | S-adenosylmethionine:tRNA ribosyltransferase-isomerase , S-ADENOSYLMETHIONINE TRNA RIBOSYLTRANSFERASE-ISOMERASE | 1                                | 1          | 1     | 1   |

Supplemental Table 3

| TIGR   | ASTRA   | Gene Name       | Gene Description                                                                              | 10700(SS1 premouse) <sup>a</sup> | G27/NSH 57 | NSH79 | SS1 |
|--------|---------|-----------------|-----------------------------------------------------------------------------------------------|----------------------------------|------------|-------|-----|
| HP1063 | JHP0362 | gidB            | glucose-inhibited division protein ,<br>GLUCOSE INHIBITED DIVISION PROTEIN B                  | 1                                | 1          | 1     | 1   |
| HP1065 | JHP0360 |                 |                                                                                               | 1                                | 1          | 1     | 1   |
| HP1066 | JHP0359 |                 | conserved hypothetical protein, putative Outer membrane protein                               | 1                                | 1          | 1     | 1   |
| HP1067 | JHP0358 | cheY            | chemotaxis protein ,<br>response regulator                                                    | 1                                | 1          | 1     | 1   |
| HP1068 | JHP0357 | prmA            | ribosomal protein L11 methyltransferase ,<br>putative RIBOSOMAL PROTEIN L11 METHYLTRANSFERASE | 1                                | 1          | 1     | 1   |
| HP1069 | JHP0356 | ftsH,<br>ftsH_2 | cell division protein ,<br>ATP-DEPENDENT ZINC METALLOPEPTIDASE                                | 1                                | 1          | 1     | 1   |
| HP1071 | JHP0354 | pssA            | phosphatidylserine synthase                                                                   | 1                                | 1          | 1     | 1   |
| HP1072 | JHP0353 | copA            | copper-transporting ATPase, P-type ,<br>COPPER-TRANSPORTING P-TYPE ATPASE                     | 1                                | 1          | 1     | 1   |
| HP1073 | JHP0352 | copP            | copper ion binding protein ,<br>copper-associated protein                                     | 1                                | 1          | 1     | 1   |
| HP1075 | JHP0350 |                 | conserved hypothetical secreted protein                                                       | 1                                | 1          | 1     | 1   |
| HP1076 | JHP0349 |                 |                                                                                               | 1                                | 1          | 1     | 1   |
| HP1077 | JHP0348 | nixA            | nickel transport protein ,<br>HIGH-AFFINITY NICKEL-TRANSPORT PROTEIN                          | 1                                | 1          | 1     | 1   |
| HP1078 | JHP0347 |                 |                                                                                               | 0                                | 0          | 1     | 0   |
| HP1079 | JHP0346 |                 |                                                                                               | 1                                | 0          | 1     | 1   |
| HP1080 | JHP0345 |                 | conserved hypothetical integral membrane protein                                              | 1                                | 1          | 1     | 1   |
| HP1081 | JHP0344 |                 |                                                                                               | 1                                | 1          | 1     | 1   |

Supplemental Table 3

| TIGR   | ASTRA   | Gene Name    | Gene Description                                                             | 10700(SS1 premouse) <sup>a</sup> | G27/NSH 57 | NSH79 | SS1 |
|--------|---------|--------------|------------------------------------------------------------------------------|----------------------------------|------------|-------|-----|
| HP1082 | JHP0343 | msbA         | multidrug resistance protein , multi-drug resistance protein                 | 1                                | 1          | 1     | 1   |
| HP1083 | JHP0342 |              | putative Outer membrane protein                                              | 1                                | 1          | 1     | 1   |
| HP1084 | JHP0341 | pyrB         | aspartate transcarbamoylase , ASPARTATE CARBAMOYLTRANSFERASE CATALYTIC CHAIN | 1                                | 1          | 1     | 1   |
| HP1085 | JHP0340 |              |                                                                              | 1                                | 1          | 1     | 1   |
| HP1086 | JHP0339 | tly, hlyA    | hemolysin , putative hemolysin                                               | 1                                | 1          | 1     | 1   |
| HP1087 | JHP0338 | ribC, ribF   | riboflavin biosynthesis regulatory protein , RIBOFLAVIN KINASE               | 1                                | 1          | 1     | 1   |
| HP1088 | JHP0337 | tktA         | transketolase A , transketolase                                              | 1                                | 1          | 1     | 1   |
| HP1089 | JHP0336 |              |                                                                              | 1                                | 1          | 1     | 1   |
| HP1090 | JHP0335 | ftsK         | cell division protein , septum formation protein                             | 1                                | 1          | 1     | 1   |
| HP1091 | JHP0334 | kgtP         | alpha-ketoglutarate permease                                                 | 1                                | 1          | 1     | 1   |
| HP1092 | JHP0333 | flgG, flgG_1 | flagellar basal-body rod protein                                             | 1                                | 1          | 1     | 1   |
| HP1093 | N/A     |              |                                                                              | 1                                | 1          | 0     | 1   |
| HP1094 | N/A     |              |                                                                              | 0                                | 1          | 0     | 0   |
| HP1095 | N/A     | tnpB         | IS605 transposase                                                            | 0                                | 1          | 0     | 0   |
| HP1096 | N/A     | tnpA         | IS605 transposase                                                            | 0                                | 1          | 1     | 0   |
| HP1097 | N/A     |              |                                                                              | 1                                | 1          | 1     | 1   |
| HP1098 | JHP1024 |              | conserved hypothetical secreted protein                                      | 1                                | 1          | 1     | 1   |
| HP1099 | JHP1025 | eda          | 2-keto-3-deoxy-6-phosphogluconate aldolase                                   | 1                                | 1          | 1     | 1   |
| HP1100 | JHP1026 | edd          | 6-phosphogluconate dehydratase, PHOSPHOGLUCONATE DEHYDRATASE                 | 1                                | 1          | 1     | 1   |
| HP1101 | JHP1027 | g6pD, zwf    | glucose-6-phosphate dehydrogenase , GLUCOSE-6-PHOSPHATE 1-DEHYDROGENASE      | 1                                | 1          | 1     | 1   |

Supplemental Table 3

| TIGR   | ASTRA   | Gene Name | Gene Description                                                                      | 10700(SS1 premouse) <sup>a</sup> | G27/NSH 57 | NSH79 | SS1 |
|--------|---------|-----------|---------------------------------------------------------------------------------------|----------------------------------|------------|-------|-----|
| HP1102 | JHP1028 | devB      | glucose-6-phosphate 1-dehydrogenase , putative dehydrogenase                          | 1                                | 1          | 1     | 1   |
| HP1103 | JHP1029 | glk       | glucokinase                                                                           | 1                                | 1          | 1     | 1   |
| HP1104 | JHP1030 | cad       | cinnamyl-alcohol dehydrogenase ELI3-2 , ZINC-DEPENDENT ALCOHOL DEHYDROGENASE          | 1                                | 1          | 1     | 1   |
| HP1105 | JHP1031 |           | LPS biosynthesis protein, putative lipopolysaccharide biosynthesis protein            | 1                                | 1          | 0     | 1   |
| HP1106 | JHP1033 |           |                                                                                       | 1                                | 1          | 1     | 1   |
| HP1107 | JHP1034 | omp23     | outer membrane protein , putative Outer membrane protein                              | 1                                | 1          | 1     | 1   |
| HP1108 | JHP1035 | porG      | pyruvate ferredoxin oxidoreductase, gamma subunit, Pyruvate ferredoxin oxidoreductase | 1                                | 1          | 1     | 1   |
| HP1109 | JHP1036 | porD      | pyruvate ferredoxin oxidoreductase, delta subunit, Pyruvate ferredoxin oxidoreductase | 1                                | 1          | 1     | 1   |
| HP1110 | JHP1037 | porA      | pyruvate ferredoxin oxidoreductase, alpha subunit, Pyruvate ferredoxin oxidoreductase | 1                                | 1          | 1     | 1   |
| HP1111 | JHP1038 | porB      | pyruvate ferredoxin oxidoreductase, beta subunit, Pyruvate ferredoxin oxidoreductase  | 1                                | 1          | 1     | 1   |
| HP1112 | JHP1039 | purB      | adenylosuccinate lyase                                                                | 1                                | 1          | 1     | 1   |
| HP1113 | JHP1040 | omp24     | outer membrane protein , putative Outer membrane protein                              | 1                                | 1          | 1     | 1   |
| HP1115 | JHP1042 |           |                                                                                       | 0                                | 1          | 1     | 1   |
| HP1117 | JHP1045 |           | conserved hypothetical secreted protein                                               | 1                                | 1          | 1     | 1   |



Supplemental Table 3

| TIGR   | ASTRA   | Gene Name    | Gene Description                                                                                        | 10700(SS1 premouse) <sup>a</sup> | G27/NSH 57 | NSH79 | SS1 |
|--------|---------|--------------|---------------------------------------------------------------------------------------------------------|----------------------------------|------------|-------|-----|
| HP1118 | JHP1046 | ggt          | gamma-glutamyltranspeptidase                                                                            | 1                                | 1          | 1     | 1   |
| HP1119 | JHP1047 | flgK         | flagellar hook-associated protein 1 (HAP1)                                                              | 1                                | 1          | 1     | 1   |
| HP1120 | JHP1048 |              |                                                                                                         | 1                                | 1          | 1     | 1   |
| HP1121 | JHP1050 | BSP6IM       | cytosine specific DNA methyltransferase , TYPE II DNA MODIFICATION ENZYME (METHYLTRANSFERASE)           | 1                                | 1          | 1     | 1   |
| HP1122 | JHP1051 |              |                                                                                                         | 1                                | 1          | 1     | 1   |
| HP1123 | JHP1052 | slyD         | peptidyl-prolyl cis-trans isomerase, FKBP-type rotamase , FKBP-TYPE PEPTIDYL-PROLYL CIS-TRANS ISOMERASE | 1                                | 1          | 1     | 1   |
| HP1124 | JHP1053 |              |                                                                                                         | 1                                | 1          | 1     | 1   |
| HP1125 | JHP1054 | omp18        | peptidoglycan associated lipoprotein precursor , putative Outer membrane protein                        | 1                                | 1          | 1     | 1   |
| HP1126 | JHP1055 | tolB         | colicin tolerance-like protein , putative TONB-INDEPENDENT PROTEIN-UPTAKE PROTEIN                       | 1                                | 1          | 1     | 1   |
| HP1129 | JHP1057 | exbD, exbD_1 | biopolymer transport protein                                                                            | 1                                | 1          | 1     | 1   |
| HP1130 | JHP1058 | exbB, exbB_1 | biopolymer transport protein                                                                            | 1                                | 1          | 1     | 1   |
| HP1131 | JHP1059 | atpC         | ATP synthase F1, subunit epsilon                                                                        | 1                                | 1          | 1     | 1   |
| HP1133 | JHP1061 | atpG         | ATP synthase F1, subunit gamma                                                                          | 1                                | 1          | 1     | 1   |
| HP1134 | JHP1062 | atpA         | ATP synthase F1, subunit alpha                                                                          | 1                                | 1          | 1     | 1   |
| HP1135 | JHP1063 | atpH         | ATP synthase F1, subunit delta , putative ATP synthase F1, subunit delta                                | 1                                | 1          | 1     | 1   |

Supplemental Table 3

| TIGR   | ASTRA   | Gene Name   | Gene Description                                                                                             | 10700(SS1 premouse) <sup>a</sup> | G27/NSH 57 | NSH79 | SS1 |
|--------|---------|-------------|--------------------------------------------------------------------------------------------------------------|----------------------------------|------------|-------|-----|
| HP1136 | JHP1064 | atpF        | ATP synthase F0, subunit b                                                                                   | 1                                | 1          | 1     | 1   |
| HP1137 | JHP1065 | atpF', atpX | ATP synthase F0, subunit b' , ATP synthase B'                                                                | 1                                | 1          | 1     | 1   |
| HP1138 | JHP1066 |             | plasmid replication-partition related protein                                                                | 1                                | 1          | 1     | 1   |
| HP1139 | JHP1067 | soj         | SpoOJ regulator                                                                                              | 1                                | 1          | 1     | 1   |
| HP1140 | JHP1068 | birA        | biotin operon repressor/biotin acetyl coenzyme A carboxylase synthetase , putative BIOTIN ACTIVATION PROTEIN | 1                                | 1          | 1     | 1   |
| HP1141 | JHP1069 | fmt         | methionyl-tRNA formyltransferase                                                                             | 1                                | 1          | 1     | 1   |
| HP1143 | JHP1071 |             |                                                                                                              | 1                                | 1          | 1     | 1   |
| HP1144 | JHP1072 |             |                                                                                                              | 1                                | 1          | 1     | 1   |
| HP1145 | JHP1073 |             |                                                                                                              | 0                                | 1          | 1     | 0   |
| HP1146 | JHP1073 |             |                                                                                                              | 1                                | 1          | 1     | 1   |
| HP1147 | JHP1074 | rpl19, rplS | ribosomal protein L19 , 50S RIBOSOMAL PROTEIN L19.                                                           | 1                                | 1          | 1     | 1   |
| HP1148 | JHP1075 | trmD        | tRNA (guanine-N1)-methyltransferase                                                                          | 1                                | 1          | 1     | 1   |
| HP1150 | JHP1077 |             |                                                                                                              | 1                                | 1          | 1     | 1   |
| HP1151 | JHP1078 | rpS16, rpsP | ribosomal protein S16 , 30S RIBOSOMAL PROTEIN S16                                                            | 1                                | 1          | 1     | 1   |
| HP1152 | JHP1079 | ffh         | signal recognition particle protein , putative SIGNAL RECOGNITION PARTICLE PROTEIN                           | 1                                | 1          | 1     | 1   |
| HP1153 | JHP1080 | valS        | valyl-tRNA synthetase                                                                                        | 1                                | 1          | 1     | 1   |
| HP1154 | JHP1081 |             |                                                                                                              | 1                                | 1          | 1     | 1   |

Supplemental Table 3

| TIGR   | ASTRA   | Gene Name    | Gene Description                                                                                                                                           | 10700(SS1 premouse) <sup>a</sup> | G27/NSH 57 | NSH79 | SS1 |
|--------|---------|--------------|------------------------------------------------------------------------------------------------------------------------------------------------------------|----------------------------------|------------|-------|-----|
| HP1155 | JHP1082 | murG         | transferase, peptidoglycan synthesis , UDP-N-ACETYLGLUCOSAMINE--N-ACETYLMURAMYL-(PENTAPEPTIDE) PYROPHOSPHORYL-UNDECAPRENOL N-ACETYLGLUCOSAMINE TRANSFERASE | 1                                | 1          | 1     | 1   |
| HP1156 | JHP1083 | omp25        | outer membrane protein , putative Outer membrane protein                                                                                                   | 1                                | 1          | 1     | 1   |
| HP1157 | JHP1084 | omp26        | outer membrane protein , putative Outer membrane protein                                                                                                   | 1                                | 1          | 1     | 0   |
| HP1158 | JHP1085 | proC         | pyrroline-5-carboxylate reductase , putative PYRROLINE-5-CARBOXYLATE REDUCTASE                                                                             | 1                                | 1          | 1     | 1   |
| HP1159 | JHP1086 | fic          | cell filamentation protein , putative cAMP induced cell filamentation protein                                                                              | 1                                | 1          | 1     | 1   |
| HP1160 | JHP1087 |              | conserved hypothetical protein                                                                                                                             | 1                                | 1          | 1     | 1   |
| HP1161 | JHP1088 | fldA         | flavodoxin                                                                                                                                                 | 1                                | 1          | 1     | 1   |
| HP1162 | JHP1089 |              | conserved hypothetical integral membrane protein                                                                                                           | 1                                | 1          | 1     | 1   |
| HP1163 | JHP1090 | fixS         | putative component of cation transport for cbb3-type oxidase                                                                                               | 1                                | 1          | 1     | 1   |
| HP1164 | JHP1091 | trxB, trxB_2 | thioredoxin reductase , putative THIOREDOXIN REDUCTASE                                                                                                     | 1                                | 1          | 1     | 1   |
| HP1165 | JHP1092 |              | tetracycline resistance protein tetA(P), putative                                                                                                          | 1                                | 1          | 1     | 1   |
| HP1166 | JHP1093 | pgi          | glucose-6-phosphate isomerase                                                                                                                              | 1                                | 1          | 1     | 1   |
| HP1167 | JHP1094 |              | putative Outer membrane protein                                                                                                                            | 1                                | 1          | 1     | 1   |

Supplemental Table 3

| TIGR   | ASTRA   | Gene Name | Gene Description                                                                                                         | 10700(SS1 premouse) <sup>a</sup> | G27/NSH 57 | NSH79 | SS1 |
|--------|---------|-----------|--------------------------------------------------------------------------------------------------------------------------|----------------------------------|------------|-------|-----|
| HP1168 | JHP1095 | cstA      | carbon starvation protein                                                                                                | 1                                | 1          | 1     | 1   |
| HP1169 | JHP1096 | glnP      | glutamine ABC transporter, permease protein , AMINO ACID ABC TRANSPORTER, PERMEASE PROTEIN                               | 1                                | 1          | 1     | 1   |
| HP1170 | JHP1097 | glnP      | glutamine ABC transporter, permease protein , AMINO ACID ABC TRANSPORTER, PERMEASE PROTEIN                               | 1                                | 1          | 1     | 1   |
| HP1171 | JHP1098 | glnQ      | glutamine ABC transporter, ATP-binding protein , AMINO ACID ABC TRANSPORTER, ATP-BINDING PROTEIN                         | 1                                | 1          | 1     | 1   |
| HP1172 | JHP1099 | glnH      | glutamine ABC transporter, periplasmic glutamine-binding protein , AMINO ACID ABC TRANSPORTER, BINDING PROTEIN PRECURSOR | 1                                | 1          | 1     | 1   |
| HP1173 | JHP1100 |           |                                                                                                                          | 1                                | 1          | 1     | 1   |
| HP1174 | JHP1101 | gluP      | glucose/galactose transporter                                                                                            | 1                                | 1          | 1     | 1   |
| HP1175 | JHP1102 |           | conserved hypothetical integral membrane protein                                                                         | 1                                | 1          | 1     | 1   |
| HP1177 | JHP1103 | omp27     | outer membrane protein , putative Outer membrane function                                                                | 1                                | 1          | 1     | 1   |
| HP1178 | JHP1104 | deoD      | purine-nucleoside phosphorylase , PURINE NUCLEOSIDE PHOSPHORYLASE                                                        | 1                                | 1          | 1     | 1   |
| HP1179 | JHP1105 | deoB      | phosphopentomutase                                                                                                       | 1                                | 1          | 1     | 1   |

Supplemental Table 3

| TIGR   | ASTRA   | Gene Name   | Gene Description                                                                                 | 10700(SS1 premouse) <sup>a</sup> | G27/NSH 57 | NSH79 | SS1 |
|--------|---------|-------------|--------------------------------------------------------------------------------------------------|----------------------------------|------------|-------|-----|
| HP1180 | JHP1106 | nupC        | pyrimidine nucleoside transport protein , putative nucleoside transporter                        | 1                                | 1          | 1     | 1   |
| HP1181 | JHP1107 |             | multidrug-efflux transporter, putative transporter                                               | 1                                | 1          | 1     | 1   |
| HP1182 | JHP1108 |             | conserved hypothetical protein                                                                   | 1                                | 1          | 1     | 1   |
| HP1183 | JHP1109 | napA        | NA <sup>+</sup> /H <sup>+</sup> antiporter , putative NA <sup>+</sup> /H <sup>+</sup> ANTIPORTER | 1                                | 1          | 1     | 1   |
| HP1184 | JHP1110 |             | conserved hypothetical integral membrane protein                                                 | 1                                | 1          | 1     | 1   |
| HP1185 | JHP1111 |             | conserved hypothetical integral membrane protein                                                 | 1                                | 1          | 1     | 1   |
| HP1186 | JHP1112 |             | carbonic anhydrase                                                                               | 1                                | 1          | 1     | 1   |
| HP1187 | JHP1113 |             |                                                                                                  | 1                                | 1          | 1     | 1   |
| HP1188 | N/A     |             |                                                                                                  | 1                                | 1          | 1     | 1   |
| HP1189 | JHP1114 | asd         | aspartate-semialdehyde dehydrogenase                                                             | 1                                | 1          | 1     | 1   |
| HP1190 | JHP1115 | hisS        | histidyl-tRNA synthetase                                                                         | 1                                | 1          | 1     | 1   |
| HP1191 | JHP1116 | rfaF, waaF  | ADP-heptose-lps heptosyltransferase II , ADP-HEPTOSE--LPS HEPTOSYLTRANSFERASE II                 | 1                                | 1          | 1     | 1   |
| HP1192 | JHP1117 |             | secreted protein involved in flagellar motility, putative motility protein                       | 1                                | 1          | 1     | 1   |
| HP1193 | N/A     |             | aldo-keto reductase, putative                                                                    | 1                                | 1          | 0     | 1   |
| HP1195 | JHP1118 | fusA        | translation elongation factor EF-G , ELONGATION FACTOR G (EF-G)                                  | 1                                | 1          | 1     | 1   |
| HP1196 | JHP1119 | rps7, rpsG  | ribosomal protein S7 , 30S RIBOSOMAL PROTEIN S7                                                  | 1                                | 1          | 1     | 1   |
| HP1197 | JHP1120 | rps12, rpsL | ribosomal protein S12 , 30S RIBOSOMAL PROTEIN S12                                                | 1                                | 1          | 1     | 1   |

Supplemental Table 3

| TIGR   | ASTRA   | Gene Name      | Gene Description                                                                                             | 10700(SS1 premouse) <sup>a</sup> | G27/NSH 57 | NSH79 | SS1 |
|--------|---------|----------------|--------------------------------------------------------------------------------------------------------------|----------------------------------|------------|-------|-----|
| HP1199 | JHP1122 | rpl7/l12, rplL | ribosomal protein L7/L12 , 50S RIBOSOMAL PROTEIN L7/L12                                                      | 1                                | 1          | 1     | 1   |
| HP1200 | JHP1123 | rpl10, rplJ    | ribosomal protein L10 , 50S RIBOSOMAL PROTEIN L10                                                            | 1                                | 1          | 1     | 1   |
| HP1201 | JHP1124 | rpl1, rplA     | ribosomal protein L1 , 50S RIBOSOMAL PROTEIN L1                                                              | 1                                | 1          | 1     | 1   |
| HP1202 | JHP1125 | rpl11, rplK    | ribosomal protein L11 , 50S RIBOSOMAL PROTEIN L11                                                            | 1                                | 1          | 1     | 1   |
| HP1204 | JHP1127 | rpl33, rpmG    | ribosomal protein L33 , 50S RIBOSOMAL PROTEIN L33                                                            | 1                                | 1          | 1     | 1   |
| HP1205 | JHP1128 | tufB, tufA     | translation elongation factor EF-Tu , ELONGATION FACTOR TU (EF-TU)                                           | 1                                | 1          | 1     | 1   |
| HP1206 | JHP1129 | hetA           | multidrug resistance protein , abc transporter, ATP-binding protein                                          | 1                                | 1          | 1     | 1   |
| HP1207 | JHP1130 |                |                                                                                                              | 1                                | 1          | 1     | 1   |
| HP1208 | JHP1131 | M.HpyI         | ulcer associated adenine specific DNA methyltransferase, TYPE II DNA MODIFICATION ENZYME (METHYLTRANSFERASE) | 1                                | 1          | 1     | 1   |
| HP1209 | N/A     | iceA           | ulcer-associated gene restriction endonuclease                                                               | 0                                | 0          | 1     | 0   |
| HP1210 | JHP1133 | cysE           | serine acetyltransferase , O-SERINE ACETYLTRANSFERASE                                                        | 1                                | 1          | 1     | 1   |
| HP1211 | JHP1134 |                |                                                                                                              | 1                                | 1          | 1     | 1   |
| HP1212 | JHP1135 | atpE           | ATP synthase F0, subunit c                                                                                   | 1                                | 1          | 0     | 1   |
| HP1213 | JHP1136 | pnp            | polynucleotide phosphorylase , POLYRIBONUCLEOTIDE NUCLEOTIDYLTRANSFERASE                                     | 1                                | 1          | 1     | 1   |

Supplemental Table 3

| TIGR   | ASTRA   | Gene Name    | Gene Description                                                                    | 10700(SS1 premouse) <sup>a</sup> | G27/NSH 57 | NSH79 | SS1 |
|--------|---------|--------------|-------------------------------------------------------------------------------------|----------------------------------|------------|-------|-----|
| HP1214 | JHP1137 |              | conserved hypothetical protein                                                      | 1                                | 1          | 1     | 1   |
| HP1215 | JHP1138 | imp          | putative role in outer membrane permeability                                        | 1                                | 1          | 1     | 1   |
| HP1216 | JHP1138 |              | conserved hypothetical secreted protein                                             | 1                                | 1          | 1     | 1   |
| HP1217 | JHP1139 |              |                                                                                     | 1                                | 1          | 1     | 1   |
| HP1218 | JHP1140 | purD         | glycinamide ribonucleotide synthetase                                               | 1                                | 1          | 1     | 1   |
| HP1219 | N/A     |              |                                                                                     | 1                                | 1          | 1     | 1   |
| HP1220 | JHP1141 | yhcG         | ABC transporter, ATP-binding protein, putative ABC transporter, ATP-binding protein | 1                                | 1          | 1     | 1   |
| HP1221 | JHP1142 |              | conserved hypothetical protein                                                      | 1                                | 1          | 1     | 1   |
| HP1222 | JHP1143 | dld          | D-lactate dehydrogenase                                                             | 1                                | 1          | 1     | 1   |
| HP1223 | JHP1144 |              |                                                                                     | 1                                | 1          | 1     | 1   |
| HP1224 | JHP1145 | hemD         | uroporphyrinogen III cosynthase, putative UROPORPHYRINOGEN-III SYNTHASE             | 0                                | 1          | 1     | 1   |
| HP1225 | JHP1146 |              | conserved hypothetical integral membrane protein                                    | 1                                | 1          | 1     | 1   |
| HP1226 | JHP1147 | hemN, hemN_2 | oxygen-independent coproporphyrinogen III oxidase                                   | 1                                | 1          | 1     | 1   |
| HP1227 | JHP1148 |              | cytochrome c553, PERIPLASMIC CYTOCHROME C-553                                       | 1                                | 1          | 1     | 1   |
| HP1229 | JHP1150 | lysC         | aspartokinase, ASPARTOKINASE 2 ALPHA AND BETA SUBUNITS                              | 1                                | 1          | 1     | 1   |
| HP1230 | JHP1151 |              |                                                                                     | 1                                | 1          | 1     | 1   |
| HP1231 | JHP1152 | holB         | DNA polymerase III delta prime subunit, putative DNA polymerase III subunit delta'  | 1                                | 1          | 1     | 1   |
| HP1232 | JHP1153 | folP         | dihydropterolate synthase                                                           | 1                                | 1          | 1     | 1   |
| HP1233 | JHP1154 |              |                                                                                     | 1                                | 1          | 1     | 1   |

Supplemental Table 3

| TIGR   | ASTRA   | Gene Name   | Gene Description                                                                                       | 10700(SS1 premouse) <sup>a</sup> | G27/NSH 57 | NSH79 | SS1 |
|--------|---------|-------------|--------------------------------------------------------------------------------------------------------|----------------------------------|------------|-------|-----|
| HP1234 | JHP1155 |             | conserved hypothetical integral membrane protein                                                       | 1                                | 1          | 1     | 1   |
| HP1235 | JHP1156 |             | conserved hypothetical integral membrane protein                                                       | 1                                | 1          | 1     | 1   |
| HP1236 | JHP1157 |             |                                                                                                        | 1                                | 1          | 1     | 1   |
| HP1237 | JHP1158 | pyrAa, carA | carbamoyl-phosphate synthetase , CARBAMOYL-PHOSPHATE SYNTHASE SMALL CHAIN                              | 1                                | 1          | 1     | 1   |
| HP1238 | JHP1159 | aimE        | aliphatic amidase                                                                                      | 1                                | 1          | 1     | 1   |
| HP1239 | N/A     |             |                                                                                                        | 1                                | 1          | 1     | 1   |
| HP1242 | JHP1163 |             | conserved hypothetical protein                                                                         | 1                                | 1          | 1     | 1   |
| HP1243 | JHP0833 | omp28, babA | outer membrane protein , outer membrane protein - adhesin                                              | 0                                | 1          | 0     | 0   |
| HP1244 | JHP1165 | rps18, rpsR | ribosomal protein S18 , 30S RIBOSOMAL PROTEIN S18                                                      | 1                                | 1          | 1     | 1   |
| HP1245 | JHP1166 | ssb         | single-strand DNA-binding protein , SINGLE-STRAND BINDING PROTEIN                                      | 1                                | 1          | 1     | 1   |
| HP1246 | JHP1167 | rps6, rpsF  | ribosomal protein S6 , 30S RIBOSOMAL PROTEIN S6                                                        | 1                                | 1          | 1     | 1   |
| HP1249 | JHP1170 | aroE        | shikimate 5-dehydrogenase                                                                              | 1                                | 1          | 1     | 1   |
| HP1250 | JHP1171 |             |                                                                                                        | 1                                | 1          | 1     | 1   |
| HP1251 | JHP1172 | oppB        | oligopeptide ABC transporter, permease protein , putative Peptide ABC transporter, ATP-binding protein | 1                                | 1          | 1     | 1   |
| HP1253 | JHP1174 | trpS        | tryptophanyl-tRNA synthetase                                                                           | 1                                | 1          | 1     | 1   |
| HP1255 | JHP1176 | secG        | protein translocation protein, low temperature , PROTEIN-EXPORT MEMBRANE PROTEIN                       | 1                                | 1          | 1     | 1   |



Supplemental Table 3

| TIGR   | ASTRA   | Gene Name  | Gene Description                                                                        | 10700(SS1 premouse) <sup>a</sup> | G27/NSH 57 | NSH79 | SS1 |
|--------|---------|------------|-----------------------------------------------------------------------------------------|----------------------------------|------------|-------|-----|
| HP1256 | JHP1177 | frr        | ribosome releasing factor , RIBOSOME RECYCLING FACTOR (RIBOSOME RELEASING FACTOR) (RRF) | 1                                | 1          | 1     | 1   |
| HP1257 | JHP1178 | pyrE       | orotate phosphoribosyltransferase                                                       | 1                                | 1          | 1     | 1   |
| HP1258 | JHP1179 |            | conserved hypothetical mitochondrial protein 4                                          | 1                                | 1          | 1     | 1   |
| HP1259 | JHP1180 |            | conserved hypothetical protein                                                          | 1                                | 1          | 1     | 1   |
| HP1260 | JHP1181 | NQO7, nuoA | NADH-ubiquinone oxidoreductase, NQO7 subunit , NADH oxidoreductase I                    | 1                                | 1          | 1     | 1   |
| HP1261 | JHP1182 | NQO6, nuoB | NADH-ubiquinone oxidoreductase, NQO6 subunit , NADH oxidoreductase I                    | 1                                | 1          | 1     | 1   |
| HP1262 | JHP1183 | NQO5, nuoC | NADH-ubiquinone oxidoreductase, NQO5 subunit , NADH oxidoreductase I                    | 1                                | 1          | 1     | 1   |
| HP1263 | JHP1184 | NQO4, nuoD | NADH-ubiquinone oxidoreductase, NQO4 subunit , NADH oxidoreductase I                    | 1                                | 1          | 1     | 1   |
| HP1266 | JHP1187 | NQO3, nuoG | NADH-ubiquinone oxidoreductase, NQO3 subunit , NADH oxidoreductase I                    | 1                                | 1          | 1     | 1   |
| HP1267 | JHP1188 | NQO8, nuoH | NADH-ubiquinone oxidoreductase, NQO8 subunit , NADH oxidoreductase I                    | 1                                | 1          | 1     | 1   |

Supplemental Table 3

| TIGR   | ASTRA   | Gene Name   | Gene Description                                                      | 10700(SS1 premouse) <sup>a</sup> | G27/NSH 57 | NSH79 | SS1 |
|--------|---------|-------------|-----------------------------------------------------------------------|----------------------------------|------------|-------|-----|
| HP1268 | JHP1189 | NQO9, nuoI  | NADH-ubiquinone oxidoreductase, NQO9 subunit , NADH oxidoreductase I  | 1                                | 1          | 1     | 1   |
| HP1269 | JHP1190 | NQO10, nuoJ | NADH-ubiquinone oxidoreductase, NQO10 subunit , NADH oxidoreductase I | 1                                | 1          | 1     | 1   |
| HP1270 | JHP1191 | NQO11, nuoK | NADH-ubiquinone oxidoreductase, NQO11 subunit , NADH oxidoreductase I | 1                                | 1          | 1     | 1   |
| HP1272 | JHP1193 | NQO13, nuoM | NADH-ubiquinone oxidoreductase, NQO13 subunit , NADH oxidoreductase I | 1                                | 1          | 1     | 1   |
| HP1273 | JHP1194 | NQO14, nuoN | NADH-ubiquinone oxidoreductase, NQO14 subunit , NADH oxidoreductase I | 1                                | 1          | 1     | 1   |
| HP1274 | JHP1195 | pflA        | paralysed flagella protein , FLAGELLAR FUNCTIONAL PROTEIN             | 1                                | 1          | 1     | 1   |
| HP1275 | JHP1196 | algC        | phosphomannomutase , phosphohexosemutase                              | 1                                | 1          | 1     | 1   |
| HP1276 | JHP1197 |             |                                                                       | 0                                | 1          | 1     | 1   |
| HP1277 | JHP1198 | trpA        | tryptophan synthase, alpha subunit , TRYPTOPHAN SYNTHASE ALPHA CHAIN  | 1                                | 1          | 1     | 1   |
| HP1278 | JHP1199 | trpB        | tryptophan synthase, beta subunit , TRYPTOPHAN SYNTHASE BETA CHAIN    | 1                                | 1          | 1     | 1   |
| HP1279 | JHP1200 | trpC        | anthranilate isomerase , INDOLE-3-GLYCEROL PHOSPHATE SYNTHASE         | 1                                | 1          | 1     | 1   |

Supplemental Table 3

| TIGR   | ASTRA   | Gene Name   | Gene Description                                                          | 10700(SS1 premouse) <sup>a</sup> | G27/NSH 57 | NSH79 | SS1 |
|--------|---------|-------------|---------------------------------------------------------------------------|----------------------------------|------------|-------|-----|
| HP1280 | JHP1201 | trpD        | ANTHRANILATE PHOSPHORIBOSYLTRANSFERASE                                    | 1                                | 1          | 1     | 1   |
| HP1281 | JHP1202 | trpD, trpG  | anthranilate synthase component II                                        | 1                                | 1          | 1     | 1   |
| HP1283 | N/A     |             |                                                                           | 0                                | 1          | 0     | 0   |
| HP1284 | JHP1204 |             | conserved hypothetical protein                                            | 1                                | 1          | 1     | 1   |
| HP1286 | JHP1206 |             | conserved hypothetical secreted protein                                   | 1                                | 1          | 1     | 1   |
| HP1287 | JHP1207 | tenA        | transcriptional regulator , putative TRANSCRIPTIONAL REGULATOR            | 1                                | 1          | 1     | 1   |
| HP1288 | JHP1208 |             |                                                                           | 0                                | 0          | 0     | 0   |
| HP1289 | JHP1209 |             |                                                                           | 1                                | 1          | 0     | 1   |
| HP1292 | JHP1212 | rpl17, rplQ | ribosomal protein L17 , 50S RIBOSOMAL PROTEIN L17                         | 1                                | 1          | 1     | 1   |
| HP1293 | JHP1213 | rpoA        | DNA-directed RNA polymerase, alpha subunit , RNA POLYMERASE ALPHA SUBUNIT | 1                                | 1          | 1     | 1   |
| HP1294 | JHP1214 | rps4, rpsD  | ribosomal protein S4 , 30S RIBOSOMAL PROTEIN S4                           | 1                                | 1          | 1     | 1   |
| HP1295 | JHP1215 | rps11, rpsK | ribosomal protein S11 , 30S RIBOSOMAL PROTEIN S11                         | 1                                | 1          | 1     | 1   |
| HP1296 | JHP1216 | rps13, rpsM | ribosomal protein S13 , 30S RIBOSOMAL PROTEIN S13                         | 1                                | 1          | 1     | 1   |
| HP1297 | JHP1217 | rpl36, rpmJ | ribosomal protein L36 , 50S RIBOSOMAL PROTEIN L36                         | 1                                | 1          | 1     | 1   |
| HP1299 | JHP1219 | map         | methionine amino peptidase , METHIONINE AMINOPEPTIDASE                    | 1                                | 1          | 1     | 1   |
| HP1300 | JHP1220 | secY        | preprotein translocase subunit                                            | 1                                | 1          | 1     | 1   |
| HP1301 | JHP1221 | rpl15, rplO | ribosomal protein L15 , 50S RIBOSOMAL PROTEIN L15                         | 1                                | 1          | 1     | 1   |

Supplemental Table 3

| TIGR   | ASTRA   | Gene Name      | Gene Description                                                  | 10700(SS1 premouse) <sup>a</sup> | G27/NSH 57 | NSH79 | SS1 |
|--------|---------|----------------|-------------------------------------------------------------------|----------------------------------|------------|-------|-----|
| HP1302 | JHP1222 | rps5, rpsE     | ribosomal protein S5 ,<br>30S RIBOSOMAL<br>PROTEIN S5             | 1                                | 1          | 1     | 1   |
| HP1303 | JHP1223 | rpl18, rplR    | ribosomal protein L18 ,<br>50S RIBOSOMAL<br>PROTEIN L18           | 1                                | 1          | 1     | 1   |
| HP1304 | JHP1224 | rpl6, rplF     | ribosomal protein L6 ,<br>50S RIBOSOMAL<br>PROTEIN L6             | 1                                | 1          | 1     | 1   |
| HP1305 | JHP1225 | rps8, rpsH     | ribosomal protein S8 ,<br>putative 30S<br>RIBOSOMAL<br>PROTEIN S8 | 1                                | 1          | 1     | 1   |
| HP1306 | JHP1226 | rpS14,<br>rpsN | ribosomal protein S14 ,<br>30S RIBOSOMAL<br>PROTEIN S14           | 1                                | 1          | 1     | 1   |
| HP1308 | JHP1228 | rpl24, rplX    | ribosomal protein L24 ,<br>50S RIBOSOMAL<br>PROTEIN L24           | 1                                | 1          | 1     | 1   |
| HP1309 | JHP1229 | rpl14, rplN    | ribosomal protein L14 ,<br>50S RIBOSOMAL<br>PROTEIN L14           | 1                                | 1          | 1     | 1   |
| HP1310 | JHP1230 | rps17,<br>rpsQ | ribosomal protein S17 ,<br>30S RIBOSOMAL<br>PROTEIN S17           | 1                                | 1          | 1     | 1   |
| HP1311 | JHP1231 | rpL29,<br>rpmC | ribosomal protein L29 ,<br>50S RIBOSOMAL<br>PROTEIN L29           | 1                                | 1          | 1     | 1   |
| HP1312 | JHP1232 | rpl16, rplP    | ribosomal protein L16 ,<br>50S RIBOSOMAL<br>PROTEIN L16           | 1                                | 1          | 1     | 1   |
| HP1313 | JHP1233 | rps3, rpsC     | ribosomal protein S3 ,<br>30S RIBOSOMAL<br>PROTEIN S3             | 1                                | 1          | 1     | 1   |
| HP1314 | JHP1234 | rpl22, rplV    | ribosomal protein L22 ,<br>50S RIBOSOMAL<br>PROTEIN L22           | 1                                | 1          | 1     | 1   |
| HP1318 | JHP1238 | rpl4, rplD     | ribosomal protein L4 ,<br>50S RIBOSOMAL<br>PROTEIN L4             | 1                                | 1          | 1     | 1   |
| HP1319 | JHP1239 | rpl3, rplC     | ribosomal protein L3 ,<br>50S RIBOSOMAL<br>PROTEIN L3             | 1                                | 1          | 1     | 1   |
| HP1320 | JHP1240 | rps10,<br>rpsJ | ribosomal protein S10 ,<br>30S RIBOSOMAL<br>PROTEIN S10           | 1                                | 1          | 1     | 1   |
| HP1322 | JHP1242 |                |                                                                   | 1                                | 1          | 1     | 1   |

Supplemental Table 3

| TIGR   | ASTRA   | Gene Name    | Gene Description                                                                                      | 10700(SS1 premouse) <sup>a</sup> | G27/NSH 57 | NSH79 | SS1 |
|--------|---------|--------------|-------------------------------------------------------------------------------------------------------|----------------------------------|------------|-------|-----|
| HP1323 | JHP1243 | rnhB         | ribonuclease HII                                                                                      | 1                                | 1          | 1     | 1   |
| HP1324 | JHP1244 |              |                                                                                                       | 1                                | 1          | 0     | 1   |
| HP1325 | JHP1245 | fumC         | fumarase                                                                                              | 1                                | 1          | 1     | 1   |
| HP1326 | JHP1246 |              |                                                                                                       | 1                                | 1          | 1     | 1   |
| HP1327 | JHP1247 |              |                                                                                                       | 1                                | 1          | 1     | 1   |
| HP1328 | JHP1248 | czcA, czcB_2 | cation efflux system protein                                                                          | 1                                | 1          | 1     | 1   |
| HP1329 | JHP1249 | czcA, czcA_2 | cation efflux system protein                                                                          | 1                                | 1          | 1     | 1   |
| HP1330 | JHP1250 |              | conserved hypothetical integral membrane protein                                                      | 1                                | 1          | 1     | 1   |
| HP1331 | JHP1251 |              | conserved hypothetical integral membrane protein                                                      | 1                                | 1          | 1     | 1   |
| HP1332 | JHP1252 | dnaJ, dnaJ_2 | co-chaperone and heat shock protein , co-chaperone with DnaK                                          | 1                                | 1          | 1     | 1   |
| HP1333 | JHP1253 |              |                                                                                                       | 1                                | 1          | 1     | 1   |
| HP1334 | N/A     |              |                                                                                                       | 0                                | 1          | 0     | 0   |
| HP1335 | JHP1254 | trmU         | conserved hypothetical protein, putative TRNA (5-METHYLAMINOMETHYL-2-THIOURIDYLATE)-METHYLTRANSFERASE | 1                                | 1          | 1     | 1   |
| HP1337 | JHP1256 |              | conserved hypothetical protein                                                                        | 1                                | 1          | 1     | 1   |
| HP1338 | JHP1257 |              | conserved hypothetical protein                                                                        | 1                                | 1          | 1     | 1   |
| HP1339 | JHP1258 | exbB, exbB_2 | biopolymer transport protein                                                                          | 1                                | 1          | 1     | 1   |
| HP1340 | JHP1259 | exbD, exbD_2 | biopolymer transport protein , BIOPOLYMER TRANSPORT EXBD PROTEIN                                      | 1                                | 1          | 1     | 0   |
| HP1341 | JHP1260 | tonB, tonB_2 | siderophore-mediated iron transport protein                                                           | 1                                | 1          | 1     | 1   |
| HP1342 | JHP1261 | omp29        | outer membrane protein , putative Outer membrane protein                                              | 1                                | 1          | 0     | 1   |
| HP1343 | JHP1262 |              | conserved hypothetical integral membrane protein                                                      | 1                                | 1          | 1     | 1   |

Supplemental Table 3

| TIGR   | ASTRA   | Gene Name  | Gene Description                                                                             | 10700(SS1 premouse) <sup>a</sup> | G27/NSH 57 | NSH79 | SS1 |
|--------|---------|------------|----------------------------------------------------------------------------------------------|----------------------------------|------------|-------|-----|
| HP1344 | JHP1263 | corA       | magnesium and cobalt transport protein                                                       | 1                                | 1          | 1     | 1   |
| HP1345 | JHP1264 | pgk        | phosphoglycerate kinase                                                                      | 1                                | 1          | 1     | 1   |
| HP1346 | JHP1265 | gap, gap_2 | glyceraldehyde-3-phosphate dehydrogenase , GLYCERALDEHYDE 3 PHOSPHATE DEHYDROGENASE          | 1                                | 1          | 1     | 1   |
| HP1347 | JHP1266 | ung        | uracil-DNA glycosylase                                                                       | 1                                | 1          | 1     | 1   |
| HP1348 | JHP1267 | plsC       | 1-acyl-glycerol-3-phosphate acyltransferase , 1-ACYL-SN-GLYCEROL-3-PHOSPHATE ACYLTRANSFERASE | 1                                | 1          | 1     | 1   |
| HP1349 | JHP1268 |            |                                                                                              | 1                                | 1          | 1     | 1   |
| HP1350 | JHP1269 | prc        | protease, CARBOXYL-TERMINAL PROTEASE                                                         | 1                                | 1          | 1     | 1   |
| HP1351 | JHP1270 |            |                                                                                              | 1                                | 1          | 0     | 1   |
| HP1352 | JHP1271 | HINFIM     | adenine specific DNA methyltransferase , TYPE II DNA MODIFICATION ENZYME (METHYLTRANSFERASE) | 1                                | 1          | 0     | 1   |
| HP1354 | JHP1272 |            | putative adenine specific DNA methyltransferase                                              | 1                                | 1          | 1     | 1   |
| HP1355 | JHP1273 | nadC       | nicotinate-nucleotide pyrophosphorylase                                                      | 1                                | 1          | 1     | 1   |
| HP1356 | JHP1274 | nadA       | quinolinate synthetase A , QUINOLINATE SYNTHETASE                                            | 1                                | 1          | 1     | 1   |
| HP1357 | JHP1275 | psd        | phosphatidylserine decarboxylase proenzyme , PHOSPHATIDYLSERINE DECARBOXYLASE                | 1                                | 1          | 1     | 1   |
| HP1358 | JHP1276 |            |                                                                                              | 1                                | 1          | 1     | 1   |

Supplemental Table 3

| TIGR   | ASTRA              | Gene Name    | Gene Description                                                                                             | 10700(SS1 premouse) <sup>a</sup> | G27/NSH 57 | NSH79 | SS1 |
|--------|--------------------|--------------|--------------------------------------------------------------------------------------------------------------|----------------------------------|------------|-------|-----|
| HP1359 | JHP1277            |              |                                                                                                              | 1                                | 1          | 1     | 1   |
| HP1361 | JHP1279            | comE3, comEC | competence locus E , DNA transfer protein                                                                    | 1                                | 1          | 1     | 1   |
| HP1362 | JHP1280            | dnaB         | replicative DNA helicase                                                                                     | 1                                | 1          | 1     | 1   |
| HP1363 | JHP1281            |              | conserved hypothetical integral membrane protein                                                             | 1                                | 1          | 1     | 1   |
| HP1365 | JHP1283<br>JHP1443 |              | response regulator                                                                                           | 1                                | 1          | 1     | 1   |
| HP1366 | JHP1442            | MBOIIR       | type IIS restriction enzyme R protein , TYPE II RESTRICTION ENZYME                                           | 0                                | 0          | 0     | 0   |
| HP1367 | N/A                | mod          | type IIS restriction enzyme M1 protein                                                                       | 0                                | 0          | 0     | 0   |
| HP1368 | N/A                | mod          | type IIS restriction enzyme M2 protein                                                                       | 0                                | 0          | 0     | 0   |
| HP1369 | N/A                |              |                                                                                                              | 1                                | 1          | 1     | 1   |
| HP1370 | N/A                | mod          | type III restriction enzyme M protein                                                                        | 1                                | 1          | 1     | 1   |
| HP1372 | JHP1286            | mreC         | rod shape-determining protein                                                                                | 1                                | 1          | 1     | 1   |
| HP1373 | JHP1287            | mreB         | rod shape-determining protein                                                                                | 1                                | 1          | 1     | 1   |
| HP1374 | JHP1288            | clpX         | ATP-dependent protease ATPase subunit , ATP-DEPENDENT PROTEASE,ATP-BINDING SUBUNIT                           | 1                                | 1          | 1     | 1   |
| HP1375 | JHP1289            | lpxA         | UDP-N-acetylglucosamine acyltransferase                                                                      | 1                                | 1          | 1     | 1   |
| HP1376 | JHP1290            | fabZ         | (3R)-hydroxymyristoyl-(acyl carrier protein) dehydratase , HYDROXYMYRISTOYL-ACYL CARRIER PROTEIN DEHYDRATASE | 1                                | 1          | 1     | 1   |
| HP1377 | JHP1291            |              |                                                                                                              | 1                                | 1          | 1     | 1   |
| HP1378 | JHP1292            | comL         | competence lipoprotein                                                                                       | 1                                | 1          | 1     | 1   |
| HP1379 | JHP1293            | lon          | ATP-dependent protease , ATP-DEPENDENT PROTEASE LA                                                           | 1                                | 1          | 1     | 1   |

Supplemental Table 3

| TIGR   | ASTRA   | Gene Name    | Gene Description                                                                       | 10700(SS1 premouse) <sup>a</sup> | G27/NSH 57 | NSH79 | SS1 |
|--------|---------|--------------|----------------------------------------------------------------------------------------|----------------------------------|------------|-------|-----|
| HP1380 | JHP1294 | tyrA         | prephenate dehydrogenase                                                               | 1                                | 1          | 1     | 1   |
| HP1382 | JHP1295 |              | putative ENDONUCLEASE                                                                  | 1                                | 1          | 1     | 1   |
| HP1383 | N/A     |              | restriction modification system S subunit                                              | 1                                | 0          | 1     | 1   |
| HP1384 | JHP1441 |              |                                                                                        | 1                                | 1          | 1     | 1   |
| HP1385 | JHP1440 | fbp          | fructose-1,6-bisphosphatase                                                            | 1                                | 1          | 1     | 1   |
| HP1386 | JHP1439 | rpe          | D-ribulose-5-phosphate 3 epimerase , RIBULOSE-PHOSPHATE 3-EPIMERASE                    | 1                                | 1          | 1     | 1   |
| HP1387 | JHP1438 | dnaQ         | DNA polymerase III epsilon subunit , DNA POLYMERASE III                                | 1                                | 1          | 1     | 1   |
| HP1390 | N/A     |              |                                                                                        | 0                                | 0          | 0     | 0   |
| HP1391 | JHP1436 |              |                                                                                        | 1                                | 1          | 1     | 1   |
| HP1392 | JHP1435 |              | fibronectin/fibrinogen-binding protein                                                 | 1                                | 1          | 1     | 1   |
| HP1393 | JHP1434 | recN         | DNA repair protein , DNA REPAIR PROTEIN(RECOMBINATION PROTEIN N)                       | 1                                | 1          | 1     | 1   |
| HP1394 | JHP1433 |              | conserved hypothetical protein                                                         | 1                                | 1          | 1     | 1   |
| HP1395 | JHP1432 | omp30        | outer membrane protein , putative OUTER MEMBRANE PROTEIN                               | 1                                | 1          | 1     | 1   |
| HP1397 | JHP1430 |              |                                                                                        | 0                                | 1          | 1     | 1   |
| HP1398 | JHP1428 | ald          | alanine dehydrogenase , L-ALANINE DEHYDROGENASE                                        | 1                                | 1          | 1     | 1   |
| HP1400 | JHP1426 | fecA, fecA_3 | iron(III) dicitrate transport protein , putative IRON(III) DICITRATE TRANSPORT PROTEIN | 1                                | 1          | 1     | 1   |
| HP1401 | JHP1425 |              | conserved hypothetical protein                                                         | 1                                | 1          | 1     | 1   |



Supplemental Table 3

| TIGR   | ASTRA   | Gene Name    | Gene Description                                                                       | 10700(SS1 premouse) <sup>a</sup> | G27/NSH 57 | NSH79 | SS1 |
|--------|---------|--------------|----------------------------------------------------------------------------------------|----------------------------------|------------|-------|-----|
| HP1403 | JHP1423 | hsdM, hsdM_3 | type I restriction enzyme M protein , TYPE I RESTRICTION ENZYME (MODIFICATION SUBUNIT) | 1                                | 1          | 1     | 1   |
| HP1404 | N/A     | hsdS         | type I restriction enzyme S protein                                                    | 1                                | 0          | 1     | 1   |
| HP1406 | JHP1298 | bioB         | biotin synthetase                                                                      | 1                                | 1          | 1     | 1   |
| HP1407 | JHP1299 | rbn          | conserved hypothetical integral membrane protein, putative ribonuclease N              | 1                                | 1          | 1     | 1   |
| HP1408 | JHP1300 |              |                                                                                        | 1                                | 1          | 0     | 1   |
| HP1409 | JHP1301 |              |                                                                                        | 0                                | 1          | 1     | 0   |
| HP1410 | JHP1302 |              |                                                                                        | 1                                | 1          | 1     | 1   |
| HP1411 | JHP1303 |              |                                                                                        | 1                                | 1          | 1     | 1   |
| HP1412 | JHP1304 |              |                                                                                        | 0                                | 1          | 0     | 0   |
| HP1413 | JHP1305 |              |                                                                                        | 1                                | 1          | 1     | 1   |
| HP1414 | JHP1307 |              |                                                                                        | 1                                | 1          | 1     | 1   |
| HP1415 | JHP1308 |              | conserved hypothetical protein                                                         | 1                                | 1          | 1     | 1   |
| HP1416 | JHP1309 |              | conserved hypothetical protein                                                         | 1                                | 1          | 1     | 1   |
| HP1417 | JHP1310 | miaA         | tRNA delta(2)-isopentenylpyrophosphate transferase                                     | 1                                | 1          | 1     | 1   |
| HP1418 | JHP1311 | rfaJ         | lipopolysaccharide 1,2-glucosyltransferase , lipopolysaccharide biosynthesis protein   | 1                                | 1          | 1     | 1   |
| HP1419 | JHP1312 |              |                                                                                        | 1                                | 1          | 1     | 1   |
| HP1420 | JHP1313 | murB         | UDP-N-acetylenolpyruvoylglucosamine reductase                                          | 0                                | 1          | 1     | 1   |
| HP1421 | JHP1314 | fliQ         | flagellar biosynthetic protein , FLAGELLAR BIOSYNTHESIS PROTEIN                        | 1                                | 1          | 1     | 1   |
| HP1422 | JHP1315 | fliI         | flagellar export protein ATP synthase , FLAGELLUM-SPECIFIC ATP SYNTHASE                | 1                                | 1          | 1     | 1   |

Supplemental Table 3

| TIGR   | ASTRA   | Gene Name      | Gene Description                                                                                       | 10700(SS1 premouse) <sup>a</sup> | G27/NSH 57 | NSH79 | SS1 |
|--------|---------|----------------|--------------------------------------------------------------------------------------------------------|----------------------------------|------------|-------|-----|
| HP1421 | JHP1316 | trbB, virB11_2 | conjugative transfer regulon protein , DNA transfer protein                                            | 1                                | 1          | 1     | 1   |
| HP1423 | JHP1318 |                | conserved hypothetical protein                                                                         | 1                                | 1          | 1     | 1   |
| HP1424 | JHP1319 |                |                                                                                                        | 1                                | 1          | 1     | 1   |
| HP1425 | N/A     |                |                                                                                                        | 1                                | 0          | 1     | 1   |
| HP1427 | JHP1320 | hpn            | histidine-rich, metal binding polypeptide , putative histidine-rich metal-binding protein              | 1                                | 1          | 1     | 1   |
| HP1428 | JHP1325 |                | conserved hypothetical protein                                                                         | 1                                | 1          | 1     | 1   |
| HP1429 | JHP1324 | kpsF           | polysialic acid capsule expression protein                                                             | 1                                | 1          | 1     | 1   |
| HP1430 | JHP1323 |                | conserved hypothetical ATP-binding protein                                                             | 1                                | 1          | 1     | 1   |
| HP1431 | JHP1322 | ksgA           | 16S rRNA(adenosine-N6,N6-)-dimethyltransferase , DIMETHYLADENOSINE TRANSFERASE                         | 1                                | 1          | 1     | 1   |
| HP1432 | JHP1321 |                | histidine and glutamine-rich protein, putative histidine and glutamine-rich metal-binding protein      | 0                                | 1          | 1     | 1   |
| HP1434 | JHP1327 | purU           | formyltetrahydrofolate hydrolase                                                                       | 1                                | 1          | 1     | 1   |
| HP1435 | JHP1328 | PspA, sppA     | protease IV , putative PROTEASE IV                                                                     | 1                                | 1          | 1     | 1   |
| HP1436 | JHP1329 |                |                                                                                                        | 1                                | 1          | 1     | 1   |
| HP1437 | JHP1330 |                |                                                                                                        | 0                                | 1          | 1     | 0   |
| HP1438 | JHP1331 |                | conserved hypothetical lipoprotein                                                                     | 0                                | 0          | 0     | 0   |
| HP1439 | JHP1332 |                |                                                                                                        | 1                                | 1          | 0     | 1   |
| HP1440 | JHP1333 |                |                                                                                                        | 1                                | 1          | 1     | 1   |
| HP1441 | JHP1334 | ppi, ppiA      | peptidyl-prolyl cis-trans isomerase B, cyclosporin-type rotamase , PEPTIDYL-PROLYL CIS-TRANS ISOMERASE | 1                                | 1          | 1     | 1   |

Supplemental Table 3

| TIGR   | ASTRA   | Gene Name    | Gene Description                                                              | 10700(SS1 premouse) <sup>a</sup> | G27/NSH 57 | NSH79 | SS1 |
|--------|---------|--------------|-------------------------------------------------------------------------------|----------------------------------|------------|-------|-----|
| HP1442 | JHP1335 | csrA         | carbon storage regulator , putative carbon storage regulator                  | 1                                | 1          | 1     | 1   |
| HP1443 | JHP1336 |              | conserved hypothetical protein                                                | 1                                | 1          | 1     | 1   |
| HP1444 | JHP1337 | smpB         | small protein                                                                 | 1                                | 1          | 1     | 1   |
| HP1445 | JHP1338 | exbB, exbB_3 | biopolymer transport protein                                                  | 1                                | 1          | 1     | 1   |
| HP1446 | JHP1339 | exbD, exbD_3 | biopolymer transport protein                                                  | 1                                | 1          | 1     | 1   |
| HP1447 | JHP1340 | rpl34, rpmH  | ribosomal protein L34 , 50S RIBOSOMAL PROTEIN L34                             | 1                                | 1          | 1     | 1   |
| HP1448 | JHP1341 | rnpA         | ribonuclease P, protein component , putative RIBONUCLEASE P PROTEIN COMPONENT | 1                                | 1          | 1     | 1   |
| HP1449 | JHP1342 |              | conserved hypothetical protein                                                | 1                                | 1          | 1     | 1   |
| HP1450 | JHP1343 |              | 60 kDa inner-membrane protein, putative Inner membrane protein                | 1                                | 1          | 1     | 1   |
| HP1451 | JHP1344 |              |                                                                               | 1                                | 1          | 1     | 1   |
| HP1453 | JHP1346 |              | conserved hypothetical protein, putative Outer membrane protein               | 1                                | 1          | 1     | 1   |
| HP1454 | JHP1347 |              |                                                                               | 1                                | 1          | 1     | 1   |
| HP1455 | JHP1348 |              |                                                                               | 1                                | 1          | 1     | 1   |
| HP1456 | JHP1349 | lpp20        | membrane-associated lipoprotein , conserved lipoprotein                       | 1                                | 1          | 1     | 1   |
| HP1457 | JHP1350 |              |                                                                               | 1                                | 1          | 1     | 1   |
| HP1458 | JHP1351 |              | thioredoxin, putative THIOREDOXIN                                             | 1                                | 1          | 1     | 1   |
| HP1459 | JHP1352 |              | conserved hypothetical protein                                                | 1                                | 1          | 1     | 1   |
| HP1460 | JHP1353 | dnaE         | DNA polymerase III alpha-subunit , DNA POLYMERASE III, ALPHA CHAIN            | 1                                | 1          | 1     | 1   |
| HP1461 | JHP1354 |              | cytochrome c551 peroxidase, putative CYTOCHROME C PEROXIDASE                  | 1                                | 1          | 1     | 1   |

Supplemental Table 3

| TIGR   | ASTRA   | Gene Name | Gene Description                                                                                     | 10700(SS1 premouse) <sup>a</sup> | G27/NSH 57 | NSH79 | SS1 |
|--------|---------|-----------|------------------------------------------------------------------------------------------------------|----------------------------------|------------|-------|-----|
| HP1462 | JHP1355 |           | secreted protein involved in flagellar motility, putative motility protein                           | 1                                | 1          | 1     | 1   |
| HP1463 | JHP1356 |           |                                                                                                      | 1                                | 1          | 1     | 1   |
| HP1465 | JHP1358 | HI1087    | ABC transporter, ATP-binding protein , putative amino acid abc transporter, ATP-binding protein      | 1                                | 1          | 1     | 1   |
| HP1466 | JHP1359 |           | conserved hypothetical integral membrane protein                                                     | 1                                | 1          | 1     | 1   |
| HP1467 | JHP1360 |           | putative Outer membrane protein                                                                      | 1                                | 1          | 1     | 1   |
| HP1468 | JHP1361 | ilvE      | branched-chain-amino-acid aminotransferase , BRANCHED-CHAIN AMINO ACID AMINOTRANSFERASE              | 1                                | 1          | 1     | 1   |
| HP1469 | JHP1362 | omp31     | outer membrane protein , putative Outer membrane protein                                             | 1                                | 1          | 1     | 1   |
| HP1471 | JHP1364 | BCGIB     | type IIS restriction enzyme R protein , putative TYPE II RESTRICTION ENZYME                          | 1                                | 1          | 0     | 1   |
| HP1472 | JHP1365 | mod       | type IIS restriction enzyme M protein , putative TYPE II DNA MODIFICATION ENZYME (METHYLTRANSFERASE) | 1                                | 0          | 1     | 1   |
| HP1473 | JHP1366 |           |                                                                                                      | 1                                | 1          | 1     | 1   |
| HP1474 | JHP1367 | tmk       | thymidylate kinase                                                                                   | 1                                | 1          | 1     | 1   |
| HP1475 | JHP1368 | kdtB      | lipopolysaccharide core biosynthesis protein                                                         | 1                                | 1          | 1     | 1   |
| HP1476 | JHP1369 | ubiD      | phenylacrylic acid decarboxylase, OCTAPRENYL-4-HYDROXYBENZOATE CARBOXY-LYASE                         | 1                                | 1          | 1     | 1   |
| HP1477 | JHP1370 |           |                                                                                                      | 1                                | 1          | 1     | 1   |

Supplemental Table 3

| TIGR   | ASTRA   | Gene Name   | Gene Description                                                            | 10700(SS1 premouse) <sup>a</sup> | G27/NSH 57 | NSH79 | SS1 |
|--------|---------|-------------|-----------------------------------------------------------------------------|----------------------------------|------------|-------|-----|
| HP1478 | JHP1371 | uvrD, rep   | DNA helicase II , putative ATP-DEPENDENT DNA HELICASE                       | 1                                | 1          | 1     | 1   |
| HP1479 | JHP1372 |             |                                                                             | 1                                | 1          | 1     | 1   |
| HP1480 | JHP1373 | serS        | seryl-tRNA synthetase                                                       | 1                                | 1          | 1     | 1   |
| HP1481 | JHP1374 |             |                                                                             | 1                                | 1          | 1     | 1   |
| HP1482 | JHP1375 |             |                                                                             | 1                                | 1          | 1     | 1   |
| HP1483 | JHP1376 | gerC2, ubiE | gerC2 protein , UBIQUINONE/MENAUINONE BIOSYNTHESIS METHYLTRANSFERASE        | 1                                | 1          | 1     | 1   |
| HP1484 | JHP1377 |             | conserved hypothetical integral membrane protein                            | 1                                | 1          | 1     | 1   |
| HP1485 | JHP1378 |             | conserved hypothetical protein                                              | 1                                | 1          | 1     | 1   |
| HP1487 | JHP1380 |             | conserved hypothetical integral membrane protein                            | 1                                | 1          | 1     | 1   |
| HP1488 | JHP1381 |             | conserved hypothetical secreted protein                                     | 1                                | 1          | 1     | 1   |
| HP1489 | JHP1382 |             | lipase-like protein                                                         | 1                                | 1          | 1     | 1   |
| HP1490 | JHP1383 |             | conserved hypothetical protein                                              | 1                                | 1          | 1     | 1   |
| HP1491 | JHP1384 |             | phosphate permease, putative PHOSPHATE PERMEASE                             | 1                                | 1          | 1     | 1   |
| HP1492 | JHP1385 |             | conserved hypothetical nifU-like protein                                    | 1                                | 1          | 1     | 1   |
| HP1493 | JHP1386 |             |                                                                             | 1                                | 1          | 1     | 1   |
| HP1494 | JHP1387 | murE        | UDP-MurNac-tripeptide synthetase , UDP-N-ACETYLMURAMYL-TRIPETIDE SYNTHETASE | 1                                | 1          | 1     | 1   |
| HP1495 | JHP1388 | tal         | transaldolase                                                               | 1                                | 1          | 1     | 1   |
| HP1496 | JHP1389 | ctc, rplY   | general stress protein , putative ribosomal protein L25                     | 1                                | 1          | 1     | 1   |
| HP1498 | JHP1391 |             |                                                                             | 1                                | 1          | 1     | 1   |
| HP1499 | JHP1392 |             |                                                                             | 0                                | 0          | 0     | 0   |

Supplemental Table 3

| TIGR   | ASTRA   | Gene Name    | Gene Description                                                                       | 10700(SS1 premouse) <sup>a</sup> | G27/NSH 57 | NSH79 | SS1 |
|--------|---------|--------------|----------------------------------------------------------------------------------------|----------------------------------|------------|-------|-----|
| HP1501 | JHP1394 | omp32        | outer membrane protein , putative Outer membrane protein                               | 1                                | 1          | 1     | 1   |
| HP1502 | JHP1395 |              |                                                                                        | 1                                | 1          | 1     | 1   |
| HP1504 | JHP1397 |              | conserved hypothetical protein                                                         | 1                                | 1          | 1     | 1   |
| HP1505 | JHP1398 | ribG, ribD   | riboflavin biosynthesis protein , putative RIBOFLAVIN-SPECIFIC DEAMINASE               | 1                                | 1          | 1     | 1   |
| HP1506 | JHP1399 | gltS         | glutamate permease , Sodium/Glutamate Symporter                                        | 1                                | 1          | 1     | 1   |
| HP1507 | JHP1400 |              | conserved hypothetical ATP-binding protein                                             | 1                                | 1          | 1     | 1   |
| HP1509 | JHP1402 |              | conserved hypothetical integral membrane protein                                       | 1                                | 1          | 1     | 1   |
| HP1510 | JHP1403 | folB         | conserved hypothetical protein, DIHYDRONEOPTERIN ALDOLASE                              | 1                                | 1          | 1     | 1   |
| HP1511 | JHP1404 |              |                                                                                        | 1                                | 1          | 0     | 1   |
| HP1512 | JHP1405 | frpB, frpB_3 | iron-regulated outer membrane protein , putative IRON-REGULATED OUTER MEMBRANE PROTEIN | 1                                | 1          | 1     | 1   |
| HP1513 | JHP1406 | selA         | selenocysteine synthase SelA, putative, L-SERYL-TRNA(SER) SELENIUM TRANSFERASE         | 1                                | 1          | 1     | 1   |
| HP1516 | N/A     |              |                                                                                        | 1                                | 0          | 1     | 1   |
| HP1517 | N/A     | ECO57IR      | type IIS restriction enzyme R and M protein                                            | 0                                | 0          | 1     | 0   |
| HP1519 | N/A     |              |                                                                                        | 1                                | 0          | 1     | 1   |
| HP1520 | N/A     |              |                                                                                        | 1                                | 0          | 1     | 1   |
| HP1521 | JHP1410 | res, res_2   | type III restriction enzyme R protein , TYPE III RESTRICTION ENZYME                    | 1                                | 1          | 1     | 1   |

Supplemental Table 3

| TIGR   | ASTRA   | Gene Name  | Gene Description                                                                                                     | 10700(SS1 premouse) <sup>a</sup> | G27/NSH 57 | NSH79 | SS1 |
|--------|---------|------------|----------------------------------------------------------------------------------------------------------------------|----------------------------------|------------|-------|-----|
| HP1522 | JHP1411 | mod_2      | TYPE III DNA MODIFICATION ENZYME (METHYLTRANSFERASE)                                                                 | 0                                | 1          | 0     | 0   |
| HP1524 | JHP1413 |            |                                                                                                                      | 1                                | 1          | 1     | 1   |
| HP1525 | JHP1414 |            |                                                                                                                      | 1                                | 1          | 1     | 1   |
| HP1526 | JHP1415 | lexA, exoA | exodeoxyribonuclease                                                                                                 | 1                                | 1          | 1     | 1   |
| HP1527 | JHP1416 |            |                                                                                                                      | 1                                | 1          | 1     | 1   |
| HP1529 | JHP1417 | dnaA       | chromosomal replication initiator protein                                                                            | 1                                | 1          | 1     | 1   |
| HP1532 | JHP1420 | glmS       | glucosamine fructose-6-phosphate aminotransferase (isomerizing) , glutamine fructose-6-phosphate aminotransferase    | 1                                | 1          | 1     | 1   |
| HP1533 | JHP1421 |            | conserved hypothetical protein                                                                                       | 1                                | 1          | 1     | 1   |
| HP1534 | N/A     | tnpB       | IS605 transposase                                                                                                    | 0                                | 1          | 0     | 0   |
| HP1535 | N/A     | tnpA       | IS605 transposase                                                                                                    | 0                                | 1          | 1     | 0   |
| HP1537 | N/A     |            |                                                                                                                      | 1                                | 1          | 1     | 1   |
| HP1538 | JHP1461 | petC       | Ubiquinol cytochrome c oxidoreductase, cytochrome c1 subunit                                                         | 1                                | 1          | 1     | 1   |
| HP1539 | JHP1460 | fbcH, petB | ubiquinol cytochrome c oxidoreductase, cytochrome b subunit                                                          | 1                                | 1          | 1     | 1   |
| HP1540 | JHP1459 | fbcF, petA | ubiquinol cytochrome c oxidoreductase, Rieske 2Fe-2S subunit , Ubiquinol cytochrome c oxidoreductase, 2Fe-2S subunit | 1                                | 1          | 1     | 1   |
| HP1543 | JHP1456 | tagE       | toxR-activated gene                                                                                                  | 1                                | 1          | 1     | 1   |
| HP1544 | JHP1455 | tagE       | toxR-activated gene                                                                                                  | 1                                | 1          | 1     | 1   |
| HP1545 | JHP1454 | folC       | folylpolyglutamate synthase                                                                                          | 1                                | 1          | 1     | 1   |
| HP1546 | JHP1453 |            |                                                                                                                      | 1                                | 1          | 1     | 1   |
| HP1548 | JHP1451 |            | conserved hypothetical integral membrane protein                                                                     | 1                                | 1          | 1     | 1   |
| HP1549 | JHP1450 | secF       | protein-export membrane protein                                                                                      | 1                                | 1          | 1     | 1   |

Supplemental Table 3

| TIGR   | ASTRA   | Gene Name    | Gene Description                                                                          | 10700(SS1 premouse) <sup>a</sup> | G27/NSH 57 | NSH79 | SS1 |
|--------|---------|--------------|-------------------------------------------------------------------------------------------|----------------------------------|------------|-------|-----|
| HP1550 | JHP1449 | secD         | protein-export membrane protein                                                           | 1                                | 1          | 1     | 1   |
| HP1551 | JHP1448 |              | conserved hypothetical secreted protein                                                   | 1                                | 1          | 1     | 1   |
| HP1553 | JHP1446 | pcrA         | helicase, putative ATP-DEPENDENT HELICASE                                                 | 1                                | 1          | 1     | 1   |
| HP1554 | JHP1445 | rps2, rpsB   | ribosomal protein S2 , 30S RIBOSOMAL PROTEIN S2                                           | 1                                | 1          | 1     | 1   |
| HP1555 | JHP1444 | tsf, tfs     | translation elongation factor EF-Ts , ELONGATION FACTOR TS (EF-TS)                        | 1                                | 1          | 1     | 1   |
| HP1556 | JHP1464 | ftsI         | cell division protein , PENICILLIN-BINDING PROTEIN                                        | 1                                | 1          | 1     | 1   |
| HP1557 | JHP1465 | fliE         | flagellar basal-body protein , FLAGELLAR HOOK-BASAL BODY COMPLEX PROTEIN                  | 1                                | 1          | 1     | 1   |
| HP1558 | JHP1466 | flgC         | flagellar basal-body rod protein (proximal rod protein), FLAGELLAR BASAL-BODY ROD PROTEIN | 1                                | 1          | 1     | 1   |
| HP1559 | JHP1467 | flgB         | flagellar basal-body rod protein (proximal rod protein), FLAGELLAR BASAL-BODY ROD PROTEIN | 1                                | 1          | 1     | 1   |
| HP1560 | JHP1468 | ftsW, rodA_2 | cell division protein , putative ROD SHAPE-DETERMINING PROTEIN                            | 1                                | 1          | 1     | 1   |
| HP1561 | JHP1469 | ceuE         | iron (III) ABC transporter, periplasmic iron-binding protein                              | 1                                | 0          | 1     | 1   |
| HP1562 | JHP1470 | ceuE         | iron (III) ABC transporter, periplasmic iron-binding protein                              | 1                                | 1          | 1     | 1   |
| HP1563 | JHP1471 | tsaA         | alkyl hydroperoxide reductase , putative peroxidase                                       | 1                                | 1          | 1     | 1   |



Supplemental Table 3

| TIGR   | ASTRA   | Gene Name | Gene Description                                                    | 10700(SS1 premouse) <sup>a</sup> | G27/NSH 57 | NSH79 | SS1 |
|--------|---------|-----------|---------------------------------------------------------------------|----------------------------------|------------|-------|-----|
| HP1564 | JHP1472 |           | outer membrane protein, putative Outer membrane protein             | 1                                | 1          | 1     | 1   |
| HP1565 | JHP1473 | pbp2      | penicillin-binding protein 2 , PENICILLIN-BINDING PROTEIN           | 1                                | 1          | 1     | 1   |
| HP1566 | JHP1474 |           |                                                                     | 1                                | 1          | 1     | 1   |
| HP1567 | JHP1475 |           | conserved hypothetical GTP-binding protein                          | 1                                | 1          | 1     | 1   |
| HP1568 | JHP1476 |           |                                                                     | 1                                | 1          | 1     | 1   |
| HP1569 | JHP1477 |           |                                                                     | 1                                | 1          | 1     | 1   |
| HP1570 | JHP1478 |           | conserved hypothetical protein                                      | 1                                | 1          | 1     | 1   |
| HP1571 | JHP1479 | rlpA      | rare lipoprotein A , putative Outer membrane protein                | 1                                | 1          | 1     | 1   |
| HP1572 | JHP1480 | dniR      | regulatory protein DniR, putative REGULATORY PROTEIN                | 1                                | 1          | 1     | 1   |
| HP1573 | JHP1481 |           | conserved hypothetical protein                                      | 1                                | 1          | 1     | 1   |
| HP1574 | JHP1482 | ribC      | riboflavin synthase alpha subunit , RIBOFLAVIN SYNTHASE ALPHA CHAIN | 1                                | 1          | 1     | 1   |
| HP1575 | JHP1483 | flhB_2    | ABC transporter, putative, putative FLAGELLAR BIOSYNTHESIS PROTEIN  | 1                                | 1          | 1     | 1   |
| HP1576 | JHP1484 | abc       | ABC transporter, ATP-binding protein                                | 1                                | 1          | 1     | 1   |
| HP1577 | JHP1485 | yaeE      | ABC transporter, permease protein , ABC transporter, permease       | 1                                | 1          | 1     | 1   |
| HP1578 | N/A     |           | LPS biosynthesis protein                                            | 0                                | 1          | 0     | 0   |
| HP1579 | JHP1486 |           |                                                                     | 1                                | 1          | 1     | 0   |
| HP1580 | JHP1487 |           |                                                                     | 1                                | 1          | 1     | 1   |

Supplemental Table 3

| TIGR   | ASTRA   | Gene Name    | Gene Description                                                                                       | 10700(SS1 premouse) <sup>a</sup> | G27/NSH 57 | NSH79 | SS1 |
|--------|---------|--------------|--------------------------------------------------------------------------------------------------------|----------------------------------|------------|-------|-----|
| HP1581 | JHP1488 | llm, wecA    | methicillin resistance protein , putative UNDECAPRENYL-PHOSPHATE-ALPHA-N-ACETYLGLUCOSAMINYLTRANSFERASE | 1                                | 1          | 1     | 1   |
| HP1582 | JHP1489 | pdxJ         | pyridoxal phosphate biosynthetic protein J , PYRIDOXAL PHOSPHATE SYNTHETASE                            | 1                                | 1          | 1     | 1   |
| HP1583 | JHP1490 | pdxA         | pyridoxal phosphate biosynthetic protein A                                                             | 1                                | 1          | 1     | 1   |
| HP1584 | JHP1491 | gcp, ydiE    | sialoglycoprotease , putative O-SIALOGLYCOPROTEIN ENDOPEPTIDASE                                        | 1                                | 1          | 1     | 1   |
| HP1585 | JHP1492 | flgG, flgG_2 | flagellar basal-body rod protein , FLAGELLAR BASAL-BODY ROD PROTEIN (DISTAL ROD PROTEIN)               | 1                                | 1          | 1     | 1   |
| HP1586 | N/A     |              |                                                                                                        | 0                                | 1          | 1     | 0   |
| HP1587 | JHP1493 |              | conserved hypothetical protein                                                                         | 0                                | 1          | 0     | 0   |
| HP1588 | JHP1494 |              | conserved hypothetical protein                                                                         | 1                                | 1          | 1     | 1   |
| HP1589 | N/A     |              |                                                                                                        | 0                                | 1          | 1     | 0   |
| HP1590 | N/A     |              |                                                                                                        | 0                                | 1          | 0     | 0   |
| N/A    | JHP0044 |              | putative TYPE II DNA MODIFICATION ENZYME (METHYLTRANSFERASE)                                           | 0                                | 1          | 0     | 1   |
| N/A    | JHP0046 |              | putative TYPE II restriction enzyme                                                                    | 0                                | 0          | 0     | 0   |
| N/A    | JHP0164 |              | putative restriction enzyme                                                                            | 0                                | 0          | 0     | 0   |
| N/A    | JHP0165 |              |                                                                                                        | 0                                | 0          | 0     | 0   |
| N/A    | JHP0414 | hsdS_1a      | TYPE I RESTRICTION ENZYME (SPECIFICITY SUBUNIT)                                                        | 0                                | 0          | 1     | 0   |
| N/A    | JHP0540 |              |                                                                                                        | 1                                | 0          | 1     | 1   |

Supplemental Table 3

| TIGR | ASTRA   | Gene Name | Gene Description                                              | 10700(SS1 premouse) <sup>a</sup> | G27/NSH 57 | NSH79 | SS1 |
|------|---------|-----------|---------------------------------------------------------------|----------------------------------|------------|-------|-----|
| N/A  | JHP0562 |           | putative lipopolysaccharide biosynthesis protein              | 1                                | 0          | 1     | 1   |
| N/A  | JHP0585 |           | putative 3-HYDROXYACID DEHYDROGENASE                          | 1                                | 1          | 1     | 1   |
| N/A  | JHP0587 |           |                                                               | 0                                | 1          | 0     | 0   |
| N/A  | JHP0616 |           |                                                               | 1                                | 0          | 0     | 1   |
| N/A  | JHP0630 |           | putative TYPE II RESTRICTION ENZYME                           | 0                                | 0          | 0     | 0   |
| N/A  | JHP0726 | hsdS_4    | putative TYPE I RESTRICTION ENZYME (SPECIFICITY SUBUNIT)      | 0                                | 1          | 1     | 0   |
| N/A  | JHP0755 |           |                                                               | 0                                | 1          | 0     | 0   |
| N/A  | JHP0756 |           | putative TYPE II DNA MODIFICATION ENZYME (METHYLTRANSFER ASE) | 0                                | 1          | 0     | 0   |
| N/A  | JHP0813 |           |                                                               | 0                                | 0          | 0     | 0   |
| N/A  | JHP0820 |           | putative lipopolysaccharide biosynthesis protein              | 1                                | 0          | 0     | 1   |
| N/A  | JHP0825 |           |                                                               | 0                                | 1          | 0     | 0   |
| N/A  | JHP0826 | tnpB      | IS606 TRANSPOSASE                                             | 0                                | 0          | 1     | 0   |
| N/A  | JHP0827 | tnpA      | IS606 TRANSPOSASE                                             | 0                                | 0          | 1     | 0   |
| N/A  | JHP0828 |           |                                                               | 0                                | 1          | 1     | 1   |
| N/A  | JHP0829 |           |                                                               | 0                                | 0          | 0     | 0   |
| N/A  | JHP0830 |           |                                                               | 1                                | 1          | 0     | 1   |
| N/A  | JHP0896 |           |                                                               | 0                                | 0          | 0     | 0   |
| N/A  | JHP0914 |           |                                                               | 0                                | 0          | 0     | 0   |
| N/A  | JHP0916 |           |                                                               | 0                                | 0          | 1     | 0   |
| N/A  | JHP0917 | virB4_2   | DNA transfer protein                                          | 0                                | 1          | 0     | 0   |
| N/A  | JHP0918 | virB4_3   | DNA transfer protein                                          | 0                                | 1          | 0     | 0   |
| N/A  | JHP0922 |           |                                                               | 0                                | 1          | 0     | 0   |
| N/A  | JHP0924 |           |                                                               | 0                                | 1          | 0     | 0   |
| N/A  | JHP0925 |           |                                                               | 0                                | 0          | 1     | 0   |
| N/A  | JHP0926 |           |                                                               | 0                                | 0          | 1     | 0   |
| N/A  | JHP0927 |           |                                                               | 0                                | 1          | 1     | 0   |
| N/A  | JHP0931 | topA_3    | topoisomerase I                                               | 0                                | 0          | 1     | 0   |
| N/A  | JHP0933 |           |                                                               | 0                                | 0          | 1     | 0   |
| N/A  | JHP0934 |           |                                                               | 0                                | 0          | 1     | 0   |
| N/A  | JHP0935 |           |                                                               | 0                                | 0          | 1     | 0   |
| N/A  | JHP0936 |           |                                                               | 0                                | 0          | 1     | 0   |
| N/A  | JHP0940 |           |                                                               | 0                                | 0          | 0     | 0   |

Supplemental Table 3

| TIGR   | ASTRA   | Gene Name | Gene Description                                                           | 10700(SS1 premouse) <sup>a</sup> | G27/NSH 57 | NSH79 | SS1 |
|--------|---------|-----------|----------------------------------------------------------------------------|----------------------------------|------------|-------|-----|
| N/A    | JHP0945 |           |                                                                            | 0                                | 1          | 1     | 0   |
| N/A    | JHP0946 |           |                                                                            | 0                                | 1          | 0     | 0   |
| N/A    | JHP0948 |           |                                                                            | 0                                | 0          | 0     | 0   |
| N/A    | JHP0950 |           |                                                                            | 1                                | 0          | 0     | 1   |
| N/A    | JHP0954 |           |                                                                            | 1                                | 1          | 1     | 1   |
| N/A    | JHP0955 |           |                                                                            | 1                                | 1          | 1     | 1   |
| N/A    | JHP0956 |           |                                                                            | 1                                | 1          | 1     | 0   |
| N/A    | JHP0957 |           |                                                                            | 1                                | 1          | 1     | 1   |
| N/A    | JHP0958 |           |                                                                            | 1                                | 1          | 0     | 1   |
| N/A    | JHP0959 |           |                                                                            | 0                                | 1          | 0     | 1   |
| N/A    | JHP0960 |           |                                                                            | 0                                | 0          | 0     | 0   |
| N/A    | JHP1032 |           | putative lipopolysaccharide biosynthesis protein                           | 1                                | 0          | 0     | 1   |
| N/A    | JHP1043 |           |                                                                            | 0                                | 0          | 0     | 0   |
| N/A    | JHP1049 |           |                                                                            | 1                                | 0          | 0     | 1   |
| N/A    | JHP1132 |           |                                                                            | 1                                | 1          | 0     | 1   |
| N/A    | JHP1160 |           |                                                                            | 0                                | 0          | 1     | 0   |
| N/A    | JHP1296 | mod_1     | putative TYPE III DNA MODIFICATION ENZYME (METHYLTRANSFERASE)              | 1                                | 1          | 1     | 1   |
| N/A    | JHP1306 |           |                                                                            | 0                                | 1          | 1     | 1   |
| N/A    | JHP1408 |           |                                                                            | 0                                | 0          | 1     | 1   |
| N/A    | JHP1409 |           | putative TYPE II DNA MODIFICATION ENZYME (METHYLTRANSFERASE)               | 0                                | 0          | 0     | 1   |
| N/A    | JHP1429 |           | ZINC-DEPENDENT ALCOHOL DEHYDROGENASE                                       | 1                                | 0          | 0     | 1   |
| N/A    | JHP1437 |           |                                                                            | 1                                | 1          | 0     | 1   |
| N/A    | JHP1462 |           |                                                                            | 0                                | 0          | 1     | 0   |
| N/A    | JHP1463 |           |                                                                            | 0                                | 0          | 1     | 0   |
| N/A    | JHP1495 |           |                                                                            | 0                                | 1          | 0     | 0   |
| HP0962 | N/A     | acpP      | acyl carrier protein                                                       | 0                                | 1          | 1     | 0   |
| HP0211 | JHP0197 |           | conserved hypothetical secreted protein                                    | 1                                | 1          | 1     | 1   |
| HP0960 | JHP0894 | glyQ      | glycyl-tRNA synthetase, alpha subunit , GLYCYL-TRNA SYNTHETASE ALPHA CHAIN | 1                                | 1          | 1     | 1   |
| HP0927 | JHP0861 | htpX      | heat shock protein , stress protein                                        | 1                                | 1          | 1     | 1   |
| HP0064 | JHP0059 |           |                                                                            | 1                                | 1          | 1     | 1   |

Supplemental Table 3

| TIGR   | ASTRA   | Gene Name  | Gene Description                                                                                 | 10700(SS1 premouse) <sup>a</sup> | G27/NSH 57 | NSH79 | SS1 |
|--------|---------|------------|--------------------------------------------------------------------------------------------------|----------------------------------|------------|-------|-----|
| HP1486 | JHP1379 |            | conserved hypothetical integral membrane protein                                                 | 1                                | 1          | 1     | 1   |
| HP1452 | JHP1345 | tdhF, thdF | thiophene and furan oxidizer , putative thiophene/furan oxidation protein                        | 1                                | 1          | 1     | 1   |
| HP1353 | JHP1272 |            |                                                                                                  | 1                                | 1          | 1     | 1   |
| HP1291 | JHP1211 |            | conserved hypothetical protein                                                                   | 1                                | 1          | 1     | 1   |
| HP1057 | JHP0368 |            |                                                                                                  | 1                                | 1          | 1     | 1   |
| HP0102 | JHP0094 |            | conserved hypothetical protein                                                                   | 1                                | 1          | 1     | 1   |
| HP1364 | JHP1282 |            | signal-transducing protein, histidine kinase, putative histidine kinase sensor protein           | 1                                | 1          | 1     | 1   |
| HP0517 | JHP0466 | era        | GTP-binding protein                                                                              | 1                                | 1          | 1     | 1   |
| HP0692 | JHP0636 | yxjE, scoB | 3-oxoadipate coA-transferase subunit B , 3-OXOACID COA-TRANSFERASE, SUBUNIT B                    | 1                                | 1          | 1     | 1   |
| HP0071 | JHP0066 | urel       | urease accessory protein , urea transporter                                                      | 1                                | 1          | 1     | 1   |
| HP0287 | JHP0272 |            |                                                                                                  | 1                                | 1          | 1     | 1   |
| HP0228 | JHP0213 |            | conserved hypothetical integral membrane protein                                                 | 1                                | 1          | 1     | 1   |
| HP1497 | JHP1390 | pth        | peptidyl-tRNA hydrolase                                                                          | 0                                | 1          | 1     | 1   |
| HP0953 | JHP0887 |            |                                                                                                  | 1                                | 1          | 1     | 1   |
| HP0494 | JHP0446 | murD       | UDP-N-acetylmuramoylalanine-D-glutamate ligase , UDP-N-ACETYLMURAMOYLALANINE--D-GLUTAMATE LIGASE | 1                                | 1          | 1     | 1   |
| HP1552 | JHP1447 | nhaA       | Na <sup>+</sup> /H <sup>+</sup> antiporter , NA(+)/H(+)<br>ANTIporter 1                          | 1                                | 1          | 1     | 1   |
| HP1290 | JHP1210 | pnuC       | nicotinamide mononucleotide transporter                                                          | 1                                | 1          | 1     | 1   |

Supplemental Table 3

| TIGR   | ASTRA   | Gene Name   | Gene Description                                                                                              | 10700(SS1 premouse) <sup>a</sup> | G27/NSH 57 | NSH79 | SS1 |
|--------|---------|-------------|---------------------------------------------------------------------------------------------------------------|----------------------------------|------------|-------|-----|
| HP1026 | JHP0398 |             | conserved hypothetical helicase-like protein                                                                  | 1                                | 1          | 1     | 1   |
| HP0230 | JHP0215 | kdsB        | CTP: CMP-3-deoxy-D-manno-octulosonate-cytidylyl-transferase , 3-DEOXY-MANNO-OCTULOSONATE CYTIDYLYLTRANSFERASE | 1                                | 1          | 1     | 1   |
| HP1252 | JHP1173 | oppA        | oligopeptide ABC transporter, periplasmic oligopeptide-binding protein                                        | 1                                | 1          | 1     | 1   |
| HP0555 | JHP0502 |             |                                                                                                               | 1                                | 1          | 1     | 1   |
| HP0221 | JHP0207 |             | nifU-like protein                                                                                             | 1                                | 1          | 1     | 1   |
| HP1265 | JHP1186 | nuoF        | putative NADH oxidoreductase I                                                                                | 0                                | 1          | 1     | 1   |
| HP1247 | JHP1168 |             |                                                                                                               | 1                                | 1          | 1     | 1   |
| HP0541 | JHP0489 | cag20, cagH | cag pathogenicity island protein , cag island protein                                                         | 1                                | 1          | 1     | 1   |
| HP1514 | JHP1407 | nusA        | transcription termination factor NusA , N-UTILIZATION SUBSTANCE PROTEIN A                                     | 1                                | 1          | 1     | 1   |
| HP0481 | JHP0433 | MFOKI       | adenine specific DNA methyltransferase , putative TYPE II DNA MODIFICATION ENZYME (METHYLTRANSFERASE)         | 1                                | 1          | 1     | 1   |
| HP1248 | JHP1169 | vacB        | virulence associated protein homolog , RIBONUCLEASE II FAMILY PROTEIN                                         | 1                                | 1          | 1     | 1   |
| HP1271 | JHP1192 | NQO12, nuoL | NADH-ubiquinone oxidoreductase, NQO12 subunit , NADH oxidoreductase I                                         | 1                                | 1          | 1     | 1   |
| HP0766 | JHP0704 |             |                                                                                                               | 0                                | 0          | 0     | 0   |
| HP0269 | JHP0254 |             | conserved hypothetical ATP-binding protein                                                                    | 1                                | 1          | 1     | 1   |

Supplemental Table 3

| TIGR   | ASTRA   | Gene Name  | Gene Description                                                              | 10700(SS1 premouse) <sup>a</sup> | G27/NSH 57 | NSH79 | SS1 |
|--------|---------|------------|-------------------------------------------------------------------------------|----------------------------------|------------|-------|-----|
| HP1132 | JHP1060 | atpD       | ATP synthase F1, subunit beta                                                 | 1                                | 1          | 1     | 1   |
| HP1203 | JHP1126 | nusG       | transcription termination factor NusG , TRANSCRIPTION ANTITERMINATION PROTEIN | 1                                | 1          | 1     | 1   |
| HP1307 | JHP1227 | rpl5, rplE | ribosomal protein L5 , 50S RIBOSOMAL PROTEIN L5                               | 1                                | 1          | 1     | 1   |
| HP0072 | JHP0067 | ureB       | urease beta subunit (urea amidohydrolase) , UREASE BETA SUBUNIT               | 1                                | 1          | 1     | 1   |
| HP1523 | JHP1412 | recG       | DNA recombinase , ATP-DEPENDENT DNA HELICASE                                  | 1                                | 1          | 1     | 1   |
| HP0305 | JHP0290 |            |                                                                               | 1                                | 1          | 1     | 1   |
| HP1530 | JHP1418 | punB       | purine nucleoside phosphorylase                                               | 1                                | 1          | 1     | 1   |
| HP1285 | JHP1205 |            | conserved hypothetical secreted protein                                       | 1                                | 1          | 1     | 1   |
| HP0390 | JHP0991 | tagD, tpx  | adhesin-thiol peroxidase , THIOL PEROXIDASE                                   | 1                                | 1          | 1     | 1   |
| HP0306 | JHP0291 | hemL       | glutamate-1-semialdehyde 2,1-aminomutase                                      | 1                                | 1          | 1     | 1   |
| HP0505 | JHP0455 |            |                                                                               | 0                                | 1          | 1     | 1   |
| HP1426 | N/A     |            | conserved hypothetical protein                                                | 1                                | 0          | 1     | 1   |
| HP0918 | JHP0852 |            |                                                                               | 1                                | 1          | 1     | 1   |
| HP0433 | N/A     |            |                                                                               | 0                                | 0          | 0     | 0   |
| HP0809 | JHP0745 | fliL       | putative FLAGELLAR BIOSYNTHESIS PROTEIN                                       | 1                                | 1          | 1     | 1   |
| HP0658 | JHP0603 | gatB       | GLU-TRNA AMIDOTRANSFERASE, SUBUNIT B                                          | 1                                | 1          | 1     | 1   |
| N/A    | JHP0045 |            | putative TYPE II DNA MODIFICATION ENZYME (METHYLTRANSFERASE)                  | 0                                | 0          | 0     | 0   |
| HP0320 | JHP0303 |            | conserved hypothetical secreted protein                                       | 1                                | 1          | 1     | 1   |

Supplemental Table 3

| TIGR   | ASTRA   | Gene Name      | Gene Description                                                                                      | 10700(SS1 premouse) <sup>a</sup> | G27/NSH 57 | NSH79 | SS1 |
|--------|---------|----------------|-------------------------------------------------------------------------------------------------------|----------------------------------|------------|-------|-----|
| HP0277 | JHP0262 |                | ferredoxin                                                                                            | 1                                | 1          | 1     | 1   |
| HP0967 | N/A     | vapD           | virulence associated protein D                                                                        | 0                                | 0          | 0     | 0   |
| HP1315 | JHP1235 | rps19, rpsS    | ribosomal protein S19 , 30S RIBOSOMAL PROTEIN S19                                                     | 1                                | 1          | 1     | 1   |
| HP0689 | JHP0628 |                |                                                                                                       | 1                                | 1          | 1     | 1   |
| HP0245 | JHP0230 |                |                                                                                                       | 1                                | 1          | 1     | 1   |
| HP1198 | JHP1121 | rpoB           | DNA-directed RNA polymerase, beta subunit                                                             | 1                                | 1          | 1     | 1   |
| N/A    | JHP0928 |                |                                                                                                       | 0                                | 1          | 1     | 0   |
| HP0527 | JHP0476 | cag7, orf13/14 | cag pathogenicity island protein , cag island protein                                                 | 1                                | 1          | 1     | 1   |
| HP0610 | JHP0556 |                | toxin-like outer membrane protein                                                                     | 1                                | 1          | 1     | 1   |
| HP0922 | JHP0856 |                | toxin-like outer membrane protein, putative vacuolating cytotoxin (VacA) paralog                      | 1                                | 1          | 1     | 1   |
| HP0887 | JHP0819 | vacA           | vacuolating cytotoxin                                                                                 | 1                                | 1          | 1     | 1   |
| HP0609 | JHP0556 |                | putative vacuolating cytotoxin (VacA) paralog                                                         | 1                                | 1          | 1     | 1   |
| HP0547 | JHP0495 | cag26, cagA    | cag pathogenicity island protein , cag island protein, CYTOTOXICITY ASSOCIATED IMMUNODOMINANT ANTIGEN | 1                                | 1          | 1     | 1   |
| HP0056 | JHP0048 | putA           | delta-1-pyrroline-5-carboxylate dehydrogenase, Proline/pyrroline-5-carboxylate dehydrogenase          | 1                                | 1          | 1     | 1   |
| HP0919 | JHP0853 | pyrAb, carB    | carbamoyl-phosphate synthase (glutamine-hydrolysing) , CARBAMOYL-PHOSPHATE SYNTHASE LARGE CHAIN       | 1                                | 1          | 1     | 1   |
| HP1541 | JHP1458 | trcF, mfd      | transcription-repair coupling factor                                                                  | 1                                | 1          | 1     | 1   |



Supplemental Table 3

| TIGR   | ASTRA   | Gene Name    | Gene Description                                                                                  | 10700(SS1 premouse) <sup>a</sup> | G27/NSH 57 | NSH79 | SS1 |
|--------|---------|--------------|---------------------------------------------------------------------------------------------------|----------------------------------|------------|-------|-----|
| HP0592 | N/A     | res          | type III restriction enzyme R protein                                                             | 0                                | 1          | 0     | 0   |
| HP1402 | JHP1424 | hsdR, hsdR_3 | type I restriction enzyme R protein , TYPE I RESTRICTION ENZYME (RESTRICTION SUBUNIT)             | 1                                | 1          | 1     | 1   |
| HP1371 | JHP1285 |              | type III restriction enzyme R protein                                                             | 1                                | 1          | 1     | 1   |
| HP1116 | JHP1044 |              |                                                                                                   | 1                                | 1          | 0     | 0   |
| HP0705 | JHP0644 | uvrA         | excinuclease ABC subunit A , EXCINUCLEASE ABC SUBUNIT A.                                          | 1                                | 1          | 1     | 1   |
| HP1470 | JHP1363 | polA         | DNA polymerase I                                                                                  | 1                                | 1          | 1     | 1   |
| HP0786 | JHP0723 | secA         | preprotein translocase subunit                                                                    | 1                                | 1          | 1     | 1   |
| HP1241 | JHP1162 | alaS         | alanyl-tRNA synthetase                                                                            | 1                                | 1          | 1     | 1   |
| HP0779 | JHP0716 | acnB         | aconitase B , ACONITATE HYDRATASE                                                                 | 1                                | 1          | 1     | 1   |
| HP1547 | JHP1452 | leuS         | leucyl-tRNA synthetase                                                                            | 1                                | 1          | 1     | 1   |
| HP1503 | JHP1396 | copA, fixI   | cation-transporting ATPase, P-type , putative component of cation transport for cbb3-type oxidase | 1                                | 1          | 1     | 1   |
| HP0103 | JHP0095 | tlpB         | methyl-accepting chemotaxis protein , methyl-accepting chemotaxis protein (MCP)                   | 1                                | 1          | 1     | 1   |
| HP0259 | JHP0243 | xseA         | exonuclease VII, large subunit , EXODEOXYRIBONUCLEASE LARGE SUBUNIT                               | 1                                | 1          | 1     | 1   |
| HP0599 | JHP0546 | hylB         | hemolysin secretion protein precursor , methyl-accepting chemotaxis protein (MCP)                 | 1                                | 1          | 1     | 1   |
| HP0439 | N/A     |              |                                                                                                   | 0                                | 1          | 0     | 0   |
| HP0049 | JHP0042 |              |                                                                                                   | 1                                | 1          | 1     | 1   |
| HP0905 | JHP0841 | pta          | phosphotransacetylase                                                                             | 1                                | 0          | 1     | 0   |

Supplemental Table 3

| TIGR   | ASTRA              | Gene Name    | Gene Description                                                                         | 10700(SS1 premouse) <sup>a</sup> | G27/NSH 57 | NSH79 | SS1 |
|--------|--------------------|--------------|------------------------------------------------------------------------------------------|----------------------------------|------------|-------|-----|
| HP1360 | JHP1278            | ubiA         | 4-hydroxybenzoate octaprenyltransferase                                                  | 1                                | 1          | 1     | 1   |
| HP1050 | JHP0375            | thrB         | homoserine kinase                                                                        | 1                                | 1          | 1     | 1   |
| HP1053 | JHP0372            |              |                                                                                          | 1                                | 1          | 1     | 1   |
| HP0119 | N/A                |              |                                                                                          | 1                                | 1          | 1     | 1   |
| HP1542 | JHP1457            |              |                                                                                          | 1                                | 1          | 1     | 1   |
| N/A    | JHP1297            | res_1        | putative TYPE III RESTRICTION ENZYME                                                     | 1                                | 1          | 1     | 1   |
| HP0637 | JHP0580            |              |                                                                                          | 1                                | 1          | 1     | 1   |
| HP1298 | JHP1218            | infA         | translation initiation factor EF-1 , TRANSLATION INITIATION FACTOR IF-1                  | 1                                | 1          | 1     | 1   |
| HP0250 | JHP0235            | oppD         | oligopeptide ABC transporter, ATP-binding protein , ABC transporter, ATP-binding protein | 1                                | 1          | 1     | 1   |
| HP0351 | JHP0325            | fliF         | flagellar basal-body M-ring protein , FLAGELLAR M-RING PROTEIN                           | 1                                | 1          | 1     | 1   |
| HP0877 | JHP0811            | ruvC         | Holliday junction endodeoxyribonuclease , CROSSOVER JUNCTION ENDODEOXYRIBONUCLEASE       | 1                                | 1          | 1     | 1   |
| HP0114 | JHP0106            |              |                                                                                          | 1                                | 1          | 1     | 1   |
| HP0262 | JHP0246<br>JHP0247 |              |                                                                                          | 0                                | 1          | 0     | 1   |
| HP1114 | JHP1041            | uvrB         | excinuclease ABC subunit B                                                               | 1                                | 1          | 1     | 1   |
| HP0180 | JHP0168            | cute, Int    | apolipoprotein N-acyltransferase                                                         | 1                                | 1          | 1     | 1   |
| HP0358 | JHP1022            |              | putative Outer membrane protein                                                          | 1                                | 1          | 1     | 1   |
| HP0969 | JHP0903            | czcA, czcA_1 | cation efflux system protein , putative cation efflux system protein                     | 1                                | 1          | 1     | 1   |
| HP0669 | JHP0613            |              |                                                                                          | 1                                | 1          | 1     | 1   |
| HP0205 | JHP0191            |              |                                                                                          | 1                                | 1          | 1     | 1   |
| HP1142 | JHP1070            |              |                                                                                          | 0                                | 0          | 1     | 0   |
| HP0440 | N/A                | topA         | DNA topoisomerase I                                                                      | 0                                | 0          | 0     | 0   |
| HP1045 | N/A                | acoE         | acetyl-CoA synthetase                                                                    | 1                                | 1          | 0     | 1   |
| HP0080 | JHP0074            |              |                                                                                          | 1                                | 1          | 1     | 1   |

Supplemental Table 3

| TIGR                                           | ASTRA   | Gene Name | Gene Description                                                                                                             | 10700(SS1 premouse) <sup>a</sup> | G27/NSH 57 | NSH79 | SS1 |
|------------------------------------------------|---------|-----------|------------------------------------------------------------------------------------------------------------------------------|----------------------------------|------------|-------|-----|
|                                                |         |           | dipeptide ABC transporter, periplasmic dipeptide-binding protein , PERIPLASMIC DIPEPTIDE TRANSPORT SUBSTRATE-BINDING PROTEIN |                                  |            |       |     |
| HP0298                                         | JHP0283 | dppA      |                                                                                                                              | 1                                | 1          | 1     | 1   |
| N/A                                            | JHP0318 |           |                                                                                                                              | 1                                | 0          | 0     | 1   |
| HP1127                                         | JHP1056 |           |                                                                                                                              | 1                                | 1          | 1     | 1   |
| HP1531                                         | JHP1419 |           |                                                                                                                              | 1                                | 1          | 1     | 1   |
| <sup>a</sup> gene present (1), gene absent (0) |         |           |                                                                                                                              |                                  |            |       |     |

Supplemental Table 4

| Supplemental Table 4 Genes with transposon insertions detected |                   |                 |                 |                                                                                                                 |                                  |                                  |                                |
|----------------------------------------------------------------|-------------------|-----------------|-----------------|-----------------------------------------------------------------------------------------------------------------|----------------------------------|----------------------------------|--------------------------------|
| Pseudo Gene Order                                              | 26695 Gene Number | J99 Gene Number | Gene Name       | Gene Description                                                                                                | NSH57 Screen Totals <sup>a</sup> | NSH79 Screen Totals <sup>a</sup> | Candidate Mutants <sup>b</sup> |
| 3                                                              | HP0003            | JHP0003         | kdsA            | 3-deoxy-d-manno-octulosonic acid 8-phosphate synthetase , 3-deoxy-D-manno-octulosonic acid 8-phosphate synthase | -2                               |                                  | M                              |
| 4                                                              | HP0004            | JHP0004         | icfA            | carbonic anhydrase                                                                                              | -3                               |                                  | M                              |
| 7                                                              | HP0007            | N/A             |                 |                                                                                                                 |                                  | 0.5                              |                                |
| 9                                                              | HP0009            | JHP0007         |                 | putative Outer membrane protein                                                                                 | 0                                |                                  |                                |
| 10                                                             | HP0010            | JHP0008         | groEL           | chaperone and heat shock protein , 60kDa chaperone                                                              | 1                                | 7                                |                                |
| 16                                                             | HP0016            | JHP0014         |                 |                                                                                                                 | 3                                |                                  |                                |
| 18                                                             | HP0018            | JHP0016         |                 |                                                                                                                 | 0.5                              |                                  |                                |
| 20                                                             | HP0020            | JHP0018         | nspC            | carboxynorspermidine decarboxylase , putative carboxynorspermidine decarboxylase                                | 0.5                              |                                  |                                |
| 22                                                             | HP0022            | JHP0020         |                 | conserved hypothetical integral membrane protein                                                                | 0                                | -7.5                             | D                              |
| 25                                                             | HP0025            | JHP0021         | omp2            | outer membrane protein , putative Outer membrane protein                                                        | 5.5                              | 3.5                              |                                |
| 26                                                             | HP0026            | JHP0022         | gltA            | citrate synthase                                                                                                | 3.5                              | -1.5                             | D                              |
| 30                                                             | HP0030            | JHP0026         |                 |                                                                                                                 |                                  | -2.5                             | M                              |
| 31                                                             | HP0031            | JHP0027         |                 |                                                                                                                 |                                  | -2.5                             | M                              |
| 36                                                             | HP0036            | JHP0032         |                 |                                                                                                                 | -1                               | 2                                |                                |
| 37                                                             | HP0037            | JHP0033         | comB 7          | DNA transformation competence protein                                                                           | 0                                | -1                               |                                |
| 42                                                             | HP0042            | JHP0036         | comB 3          | trbI protein, DNA transformation competency                                                                     | -6.5                             |                                  | M                              |
| 43                                                             | HP0043            | JHP0037         | pmi, algA, manC | mannose-6-phosphate isomerase , phosphomannose isomerase/GDP-mannose pyrophosphorylase                          | -16.5                            |                                  | M                              |
| 44                                                             | HP0044            | JHP0038         | rfbD, gmd       | GDP-D-mannose dehydratase                                                                                       | -25.5                            | -6                               | B                              |
| 45                                                             | HP0045            | JHP0039         | fcl             | GDP-fucose synthetase (previously annotated as nodulation protein NolK)                                         | -2.5                             | -7                               | B                              |
| 46                                                             | HP0046            | N/A             |                 |                                                                                                                 |                                  | 1                                |                                |
| 47                                                             | HP0047            | JHP0040         | hypE            | hydrogenase expression/formation protein                                                                        | 4                                | 5                                |                                |

Supplemental Table 4

| Pseudo Gene Order | 26695 Gene Number | J99 Gene Number               | Gene Name | Gene Description                                                                                      | NSH57 Screen Totals <sup>a</sup> | NSH79 Screen Totals <sup>a</sup> | Candidate Mutants <sup>b</sup> |
|-------------------|-------------------|-------------------------------|-----------|-------------------------------------------------------------------------------------------------------|----------------------------------|----------------------------------|--------------------------------|
| 50                | HP0050            | JHP0043                       | dpnA      | adenine specific DNA methyltransferase , putative TYPE II DNA MODIFICATION ENZYME (METHYLTRANSFERASE) | 0                                |                                  |                                |
| 53                | HP0053            | N/A                           |           |                                                                                                       | 3                                | 0.5                              |                                |
| 54                | HP0054            | N/A                           |           | adenine/cytosine DNA methyltransferase                                                                |                                  | 0.5                              |                                |
| 55                | N/A               | JHP0044                       |           | putative TYPE II DNA MODIFICATION ENZYME (METHYLTRANSFERASE)                                          |                                  | 0.5                              |                                |
| 58                | HP0055            | JHP0047                       | putP      | proline permease , sodium/proline symporter                                                           |                                  | 0                                |                                |
| 62                | HP0059            | JHP0052                       |           |                                                                                                       | 2                                |                                  |                                |
| 63                | HP0060            | JHP0053<br>JHP0054<br>JHP0055 |           |                                                                                                       | 2                                | 3                                |                                |
| 64                | HP0061            | JHP0056                       |           |                                                                                                       | 0                                | -1                               |                                |
| 66                | HP0063            | JHP0058                       |           |                                                                                                       | 2                                | -0.5                             |                                |
| 69                | HP0066            | JHP0061                       | -         | Predicted ATP-binding protein                                                                         | 1                                | 3                                |                                |
| 70                | HP0067            | JHP0062                       | ureH      | urease accessory protein                                                                              | -1.5                             | 0                                | D                              |
| 71                | HP0068            | JHP0063                       | ureG      | urease accessory protein                                                                              | -2                               | -1                               | D                              |
| 72                | HP0069            | JHP0064                       | ureF      | urease accessory protein                                                                              | -0.5                             | -1                               |                                |
| 73                | HP0070            | JHP0065                       | ureE      | urease accessory protein                                                                              | 1                                | -2                               | D                              |
| 74                | HP0071            | JHP0066                       | ureI      | urease accessory protein , urea transporter                                                           |                                  | -3.5                             | M                              |
| 75                | HP0072            | JHP0067                       | ureB      | urease beta subunit (urea amidohydrolase) , UREASE BETA SUBUNIT                                       | -1.5                             | -12.5                            | B                              |
| 76                | HP0073            | JHP0068                       | ureA      | urease alpha subunit (urea amidohydrolase), UREASE ALPHA SUBUNIT                                      | -8                               | -2                               | B                              |
| 77                | HP0074            | JHP0069                       | lspA      | lipoprotein signal peptidase                                                                          | -1.5                             | -1.5                             | B                              |
| 80                | HP0077            | JHP0072                       | prfA      | peptide chain release factor RF-1 , PEPTIDE CHAIN RELEASE FACTOR 1                                    |                                  | -1                               |                                |
| 81                | HP0078            | JHP0073                       |           | putative Outer membrane protein                                                                       |                                  | 0.5                              |                                |
| 82                | HP0079            | JHP0073                       | omp3      | outer membrane protein                                                                                |                                  | 1.5                              |                                |

Supplemental Table 4

| Pseudo Gene Order | 26695 Gene Number | J99 Gene Number | Gene Name   | Gene Description                                                                                     | NSH57 Screen Totals <sup>a</sup> | NSH79 Screen Totals <sup>a</sup> | Candidate Mutants <sup>b</sup> |
|-------------------|-------------------|-----------------|-------------|------------------------------------------------------------------------------------------------------|----------------------------------|----------------------------------|--------------------------------|
| 83                | HP0080            | JHP0074         |             |                                                                                                      | 0                                |                                  |                                |
| 84                | HP0081            | N/A             |             |                                                                                                      | -1.5                             | -1                               | D                              |
| 85                | HP0082            | JHP0075         | tlpC        | methyl-accepting chemotaxis transducer , methyl-accepting chemotaxis protein (MCP)                   | -11.5                            | -2                               | B                              |
| 86                | HP0083            | JHP0076         | rps9, rpsI  | ribosomal protein S9 , 30S RIBOSOMAL PROTEIN S9                                                      |                                  | 2.5                              |                                |
| 87                | HP0084            | JHP0077         | rpl13, rplM | ribosomal protein L13 , 50S RIBOSOMAL PROTEIN L13                                                    | 0                                |                                  |                                |
| 88                | HP0085            | JHP0078         |             |                                                                                                      | 0                                |                                  |                                |
| 89                | HP0086            | JHP0079         | mgo         | Malate:quinone oxidoreductase                                                                        | 1                                |                                  |                                |
| 90                | HP0087            | JHP0080         |             |                                                                                                      | -1                               |                                  |                                |
| 91                | HP0088            | JHP0081         | rpoD        | RNA polymerase sigma-70 factor , RNA POLYMERASE SIGMA FACTOR (SIGMA-70)                              | 1                                |                                  |                                |
| 93                | HP0090            | JHP0083         | fabD        | malonyl coenzyme A-acyl carrier protein transacylase , MALONYL COA ACYL CARRIER PROTEIN TRANSACYLASE | -1.5                             |                                  | M                              |
| 94                | HP0091            | JHP0084         | hsdR        | type II restriction enzyme R protein                                                                 | -1.5                             |                                  | M                              |
| 95                | HP0092            | JHP0085         | hsdM        | type II restriction enzyme M protein , TYPE II DNA MODIFICATION ENZYME (METHYLTRANSFERASE)           |                                  | 1                                |                                |
| 96                | HP0093            | JHP0086         |             | putative ALPHA(1,2)FUCOSYLTRANSFERASE                                                                | 2                                | 1                                |                                |
| 97                | HP0094            | JHP0086         |             | conserved hypothetical protein                                                                       | -0.5                             |                                  |                                |
| 98                | HP0095            | JHP0087         |             |                                                                                                      | -0.5                             |                                  |                                |
| 99                | HP0096            | JHP0088         |             | phosphoglycerate dehydrogenase, putative keto-acid dehydrogenase                                     | 3                                |                                  |                                |
| 100               | HP0097            | JHP0089         |             |                                                                                                      | -7                               |                                  | M                              |
| 101               | HP0098            | JHP0090         | thrC        | threonine synthase                                                                                   | 6                                | 0.5                              |                                |
| 102               | HP0099            | JHP0091         | tlpA        | methyl-accepting chemotaxis protein , methyl-accepting chemotaxis protein (MCP)                      |                                  | -2.5                             | M                              |
| 103               | HP0100            | JHP0092         |             | conserved hypothetical protein                                                                       | -2.5                             | -2                               | B                              |

Supplemental Table 4

| Pseudo Gene Order | 26695 Gene Number | J99 Gene Number | Gene Name    | Gene Description                                                                                   | NSH57 Screen Totals <sup>a</sup> | NSH79 Screen Totals <sup>a</sup> | Candidate Mutants <sup>b</sup> |
|-------------------|-------------------|-----------------|--------------|----------------------------------------------------------------------------------------------------|----------------------------------|----------------------------------|--------------------------------|
| 104               | HP0101            | JHP0093         |              |                                                                                                    | 0.5                              |                                  |                                |
| 105               | HP0102            | JHP0094         | -            | Predicted glycosyl transferase                                                                     | -15                              |                                  | M                              |
| 106               | HP0103            | JHP0095         | tlpB         | methyl-accepting chemotaxis protein , methyl-accepting chemotaxis protein (MCP)                    | -5                               |                                  | M                              |
| 107               | HP0104            | JHP0096         | cpdB         | 2',3'-cyclic-nucleotide 2'-phosphodiesterase                                                       | -4                               | 0                                | D                              |
| 108               | HP0105            | JHP0097         | luxS         | Autoinducer-2 synthase                                                                             | 0                                |                                  |                                |
| 115               | HP0112            | JHP0104         | fucA         | Predicted L-fucose-1-phosphate aldolase                                                            | 0.5                              |                                  |                                |
| 116               | HP0113            | JHP0105         |              |                                                                                                    | 1                                |                                  |                                |
| 117               | HP0114            | JHP0106         |              |                                                                                                    | 0.5                              | -1                               |                                |
| 118               | HP0115            | JHP0107         | flaB         | flagellin B                                                                                        |                                  | 0.5                              |                                |
| 119               | HP0116            | JHP0108         | topA, topA_1 | DNA topoisomerase I                                                                                |                                  | 1.5                              |                                |
| 120               | HP0117            | JHP0109         |              | conserved hypothetical protein                                                                     | -1                               | 8.5                              |                                |
| 121               | HP0118            | JHP0110         |              |                                                                                                    | 2                                | 0.5                              |                                |
| 122               | HP0119            | N/A             |              |                                                                                                    | 14                               | 2.5                              |                                |
| 123               | HP0120            | N/A             |              |                                                                                                    | 12                               |                                  |                                |
| 130               | HP0127            | JHP0117         | omp4         | outer membrane protein , putative Outer membrane protein                                           | -3                               |                                  | M                              |
| 132               | HP0129            | JHP0118         |              |                                                                                                    | -2                               |                                  | M                              |
| 133               | HP0130            | JHP0119         |              |                                                                                                    | -3                               | 1.5                              | D                              |
| 135               | HP0132            | JHP0120         | sdaA, sdaB   | L-serine deaminase , L-SERINE/L-THREONINEDEAMINASE                                                 |                                  | 1.5                              |                                |
| 137               | HP0134            | JHP0122         | dhs1, aroF   | 3-deoxy-D-arabino-heptulosonate 7-phosphate synthase , PHOSPHO-2-DEHYDRO-3-DEOXYHEPTONATE ALDOLASE | -0.5                             |                                  |                                |
| 138               | HP0135            | JHP0123         |              |                                                                                                    | -0.5                             | -0.5                             |                                |
| 139               | HP0136            | JHP0124         | bcp          | bacterioferritin comigratory protein                                                               | 2                                | -3.5                             | D                              |
| 140               | HP0137            | JHP0125         |              |                                                                                                    |                                  | -7.5                             | M                              |
| 141               | HP0138            | JHP0126         |              | conserved hypothetical iron-sulfur protein                                                         |                                  | -3                               | M                              |

Supplemental Table 4

| Pseudo Gene Order | 26695 Gene Number | J99 Gene Number | Gene Name    | Gene Description                                                                              | NSH57 Screen Totals <sup>a</sup> | NSH79 Screen Totals <sup>a</sup> | Candidate Mutants <sup>b</sup> |
|-------------------|-------------------|-----------------|--------------|-----------------------------------------------------------------------------------------------|----------------------------------|----------------------------------|--------------------------------|
| 142               | HP0139            | JHP0127         |              | conserved hypothetical secreted protein                                                       |                                  | 0.5                              |                                |
| 143               | HP0140            | JHP0128         | lctP, lldP_1 | L-lactate permease                                                                            | -2                               | -0.5                             | D                              |
| 144               | HP0141            | JHP0129         | lctP, lldP_2 | L-lactate permease                                                                            |                                  | -3.5                             | M                              |
| 146               | HP0143            | JHP0131         |              |                                                                                               |                                  | 4                                |                                |
| 153               | HP0150            | JHP0138         |              |                                                                                               | 0                                |                                  |                                |
| 154               | HP0151            | JHP0139         |              | conserved hypothetical membrane protein                                                       | 0                                |                                  |                                |
| 156               | HP0153            | JHP0141         | recA         | recombinase , RECA PROTEIN.                                                                   | 1                                |                                  |                                |
| 160               | HP0157            | JHP0145         | aroK         | shikimic acid kinase I , SHIKIMATE KINASE I                                                   |                                  | 1                                |                                |
| 161               | HP0158            | JHP0146         |              |                                                                                               | -7                               | 12.5                             | D                              |
| 162               | HP0159            | JHP0147         | rfaJ         | lipopolysaccharide 1,2-glucosyltransferase , putative lipopolysaccharide biosynthesis protein | -8                               | 4.5                              | D                              |
| 163               | HP0160            | JHP0148         | hcpD         | Cysteine-rich protein D                                                                       | 1                                | 0                                |                                |
| 164               | HP0161            | N/A             |              |                                                                                               |                                  | 0                                |                                |
| 176               | HP0173            | JHP0159         | fliR         | flagellar biosynthetic protein , FLAGELLAR BIOSYNTHESIS PROTEIN                               | -1                               |                                  |                                |
| 177               | HP0174            | JHP0160         |              |                                                                                               |                                  | -2                               | M                              |
| 180               | HP0177            | JHP0163         | efp          | translation elongation factor EF-P , ELONGATION FACTOR P (EF-P)                               |                                  | -1                               |                                |
| 183               | HP0178            | JHP0166         | neuB         | spore coat polysaccharide biosynthesis protein E, sialic acid synthase                        |                                  | -1                               |                                |
| 185               | HP0180            | JHP0168         | cute, lnt    | apolipoprotein N-acyltransferase                                                              |                                  | -4                               | M                              |
| 186               | HP0181            | JHP0169         |              |                                                                                               |                                  | -4                               | M                              |
| 189               | HP0184            | JHP0172         |              |                                                                                               | 0                                |                                  |                                |
| 190               | HP0185            | JHP0173         |              |                                                                                               |                                  | 0.5                              |                                |
| 191               | HP0186            | JHP0174         |              |                                                                                               |                                  | 0.5                              |                                |
| 193               | HP0188            | JHP0174         |              |                                                                                               | -0.5                             |                                  |                                |



Supplemental Table 4

| Pseudo Gene Order | 26695 Gene Number | J99 Gene Number | Gene Name  | Gene Description                                                                         | NSH57 Screen Totals <sup>a</sup> | NSH79 Screen Totals <sup>a</sup> | Candidate Mutants <sup>b</sup> |
|-------------------|-------------------|-----------------|------------|------------------------------------------------------------------------------------------|----------------------------------|----------------------------------|--------------------------------|
| 194               | HP0189            | JHP0175         |            | conserved hypothetical integral membrane protein                                         | -0.5                             |                                  |                                |
| 207               | HP0202            | JHP0188         | fabH       | beta-ketoacyl-acyl carrier protein synthase III , BETA-KETOACYL-ACP SYNTHASE III         |                                  | 0.5                              |                                |
| 210               | HP0205            | JHP0191         |            |                                                                                          | 3                                | 0.5                              |                                |
| 213               | HP0208            | JHP0194         |            | putative lipopolysaccharide biosynthesis protein                                         |                                  | -0.5                             |                                |
| 214               | HP0209            | JHP0195         |            | putative Outer membrane protein chaperone and heat shock protein                         | 1                                | -0.5                             |                                |
| 215               | HP0210            | JHP0196         | htpG       | C62.5 , 90kDa chaperone                                                                  | -6.5                             | -0.5                             | D                              |
| 216               | HP0211            | JHP0197         | hcpA       | Cysteine-rich protein A                                                                  | -2                               | -7.5                             | B                              |
| 217               | HP0212            | JHP0198         | dapE       | succinyl-diaminopimelate desuccinylase                                                   | -0.5                             | -3                               | D                              |
| 218               | HP0213            | JHP0199         | gidA       | glucose inhibited division protein , GLUCOSE INHIBITED DIVISION PROTEIN A                |                                  | -1                               |                                |
| 219               | HP0214            | JHP0200         | huNaD C-1  | sodium-dependent transporter , putative transporter                                      | 5                                | 0.5                              |                                |
| 221               | HP0216            | JHP0202         | dxr        | Predicted 1-deoxyxylulose-5-phosphate reductoisomerase                                   |                                  | 0                                |                                |
| 223               | HP0218            | JHP0204         |            |                                                                                          | -0.5                             | -8                               | D                              |
| 224               | HP0219            | JHP0205         |            |                                                                                          | 1                                | -7.5                             | D                              |
| 225               | HP0220            | JHP0206         | nifS       | synthesis of [Fe-S] cluster , putative AMINOTRANSFERASE                                  | 4                                | -1                               |                                |
| 227               | HP0222            | JHP0208         |            |                                                                                          | -0.5                             |                                  |                                |
| 228               | HP0223            | JHP0209         | sms, radA  | ATP-dependent protease , DNA REPAIR PROTEIN                                              | -0.5                             | 4                                |                                |
| 229               | HP0224            | JHP0210         | msrA       | peptide methionine sulfoxide reductase , putative PEPTIDE METHIONINE SULFOXIDE REDUCTASE |                                  | 9                                |                                |
| 232               | HP0227            | JHP0212         | omp5       | outer membrane protein , putative Outer membrane protein                                 | 0                                | 3                                |                                |
| 233               | HP0228            | JHP0213         | -          | Predicted sulfate permease                                                               | 3                                |                                  |                                |
| 234               | HP0229            | JHP0214         | omp6, hopA | outer membrane protein , Outer membrane protein/porin                                    |                                  | -0.5                             |                                |

Supplemental Table 4

| Pseudo Gene Order | 26695 Gene Number | J99 Gene Number | Gene Name | Gene Description                                                                                              | NSH57 Screen Totals <sup>a</sup> | NSH79 Screen Totals <sup>a</sup> | Candidate Mutants <sup>b</sup> |
|-------------------|-------------------|-----------------|-----------|---------------------------------------------------------------------------------------------------------------|----------------------------------|----------------------------------|--------------------------------|
| 235               | HP0230            | JHP0215         | kdsB      | CTP: CMP-3-deoxy-D-manno-octulosonate-cytidylyl-transferase , 3-DEOXY-MANNO-OCTULOSONATE CYTIDYLYLTRANSFERASE |                                  | -0.5                             |                                |
| 236               | HP0231            | JHP0216         |           |                                                                                                               |                                  | 0.5                              |                                |
| 238               | HP0233            | JHP0218         | gsp       | Predicted glutathionespermidine synthetase                                                                    | 1                                | 0.5                              |                                |
| 239               | HP0234            | JHP0219         |           | conserved hypothetical integral membrane protein                                                              |                                  | 0.5                              |                                |
| 240               | HP0235            | JHP0220         | hcpE      | Cysteine-rich protein E                                                                                       | 3                                | 3                                |                                |
| 241               | HP0236            | JHP0221         |           |                                                                                                               |                                  | -1                               |                                |
| 242               | HP0237            | JHP0222         | hemC      | porphobilinogen deaminase                                                                                     | 1                                | 5.5                              |                                |
| 251               | HP0246            | JHP0231         | flgl      | flagellar basal-body P-ring protein , FLAGELLAR P-RING PROTEIN                                                | -3.5                             |                                  | M                              |
| 252               | HP0247            | JHP0232         | deaD      | ATP-dependent RNA helicase, DEAD-box family , ATP-DEPENDENT RNA HELICASE DEAD                                 | -0.5                             |                                  |                                |
| 253               | HP0248            | JHP0233         |           | conserved hypothetical protein                                                                                |                                  | 0.5                              |                                |
| 256               | HP0251            | JHP0236         | oppC      | oligopeptide ABC transporter, permease protein , ABC transporter, permease                                    | 2                                | 1.5                              |                                |
| 258               | HP0253            | JHP0238         |           | putative Outer membrane protein                                                                               | 1                                | 0.5                              |                                |
| 259               | HP0254            | JHP0238         | omp8      | outer membrane protein                                                                                        |                                  | 0.5                              |                                |
| 260               | HP0255            | JHP0239         | purA      | adenylosuccinate synthetase                                                                                   |                                  | 1                                |                                |
| 261               | HP0256            | JHP0240         |           |                                                                                                               |                                  | -6                               | M                              |
| 262               | HP0257            | JHP0241         |           | conserved hypothetical secreted protein                                                                       |                                  | 0                                |                                |
| 263               | HP0258            | JHP0242         |           | conserved hypothetical integral membrane protein                                                              |                                  | 2                                |                                |
| 264               | HP0259            | JHP0243         | xseA      | exonuclease VII, large subunit , EXODEOXYRIBONUCLEASE LARGE SUBUNIT                                           | 1.5                              |                                  |                                |
| 265               | HP0260            | JHP0244         | mod       | adenine specific DNA methyltransferase , TYPE II DNA MODIFICATION ENZYME (METHYLTRANSFERASE)                  | 0.5                              | -0.5                             |                                |

Supplemental Table 4

| Pseudo Gene Order | 26695 Gene Number | J99 Gene Number    | Gene Name       | Gene Description                                                                                                             | NSH57 Screen Totals <sup>a</sup> | NSH79 Screen Totals <sup>a</sup> | Candidate Mutants <sup>b</sup> |
|-------------------|-------------------|--------------------|-----------------|------------------------------------------------------------------------------------------------------------------------------|----------------------------------|----------------------------------|--------------------------------|
| 266               | HP0261            | JHP0245            |                 |                                                                                                                              |                                  | 0.5                              |                                |
| 267               | HP0262            | JHP0246<br>JHP0247 |                 |                                                                                                                              | -4                               |                                  | M                              |
| 271               | HP0266            | JHP0251            | pyrC,<br>pyrC_1 | dihydroorotase                                                                                                               |                                  | 0.5                              |                                |
| 274               | HP0269            | JHP0254            |                 | conserved hypothetical ATP-binding protein                                                                                   | 1                                | 0.5                              |                                |
| 285               | HP0280            | JHP0265            | ibpB,<br>waaM   | heat shock protein B , putative LIPID A BIOSYNTHESIS ACYLTRANSFERASE                                                         |                                  | -1                               |                                |
| 286               | HP0281            | JHP0266            | tgt             | tRNA-guanine transglycosylase , QUEUINE TRNA-RIBOSYLTRANSFERASE                                                              |                                  | -1                               |                                |
| 294               | HP0289            | JHP0274            |                 | toxin-like outer membrane protein, putative vacuolating cytotoxin (VacA) paralog                                             | 3                                | 0.5                              |                                |
| 297               | HP0292            | JHP0277            |                 |                                                                                                                              | 1                                | 2.5                              |                                |
| 298               | HP0293            | JHP0278            | pabB            | para-aminobenzoate synthetase , P-AMINO BENZOATE SYNTHETASE                                                                  | 1                                | 6                                |                                |
| 299               | HP0294            | JHP0279            | aimE,<br>amiE   | aliphatic amidase                                                                                                            | 0                                | -2.5                             | D                              |
| 300               | HP0295            | JHP0280            | fla,<br>flgL    | flagellin B homolog , putative FLAGELLAR-HOOK ASSOCIATED PROTEIN 3 (HAP3)                                                    | 4                                | 0.5                              |                                |
| 303               | HP0298            | JHP0283            | dppA            | dipeptide ABC transporter, periplasmic dipeptide-binding protein , PERIPLASMIC DIPEPTIDE TRANSPORT SUBSTRATE-BINDING PROTEIN |                                  | -0.5                             |                                |
| 307               | HP0302            | JHP0287            | dppF            | dipeptide ABC transporter, ATP-binding protein , DIPEPTIDE TRANSPORT SYSTEM ATP-BINDING PROTEIN                              |                                  | 9                                |                                |
| 308               | HP0303            | JHP0288            | obg             | GTP-binding protein                                                                                                          | -1.5                             |                                  | M                              |
| 309               | HP0304            | JHP0289            |                 |                                                                                                                              | -1.5                             |                                  | M                              |
| 310               | HP0305            | JHP0290            |                 |                                                                                                                              |                                  | 3                                |                                |
| 314               | HP0309            | JHP0294            | -               | Predicted N-carbamoyl-D-amino acid amidohydrolase                                                                            | 1                                |                                  |                                |
| 315               | HP0310            | JHP0295            |                 | conserved hypothetical protein                                                                                               | 7.5                              | 8                                |                                |
| 316               | HP0311            | JHP0296            |                 |                                                                                                                              | 1.5                              | 1                                |                                |

Supplemental Table 4

| Pseudo Gene Order | 26695 Gene Number | J99 Gene Number | Gene Name        | Gene Description                                                                                     | NSH57 Screen Totals <sup>a</sup> | NSH79 Screen Totals <sup>a</sup> | Candidate Mutants <sup>b</sup> |
|-------------------|-------------------|-----------------|------------------|------------------------------------------------------------------------------------------------------|----------------------------------|----------------------------------|--------------------------------|
| 317               | HP0312            | JHP0297         |                  | conserved hypothetical ATP-binding protein                                                           | -2                               | 0                                | D                              |
| 318               | HP0313            | JHP0298         | narK             | nitrite extrusion protein                                                                            | 0                                |                                  |                                |
| 322               | HP0317            | N/A             | omp9, hopU, babC | outer membrane protein                                                                               | 0                                |                                  |                                |
| 329               | HP0324            | JHP0307         | omp10            | outer membrane protein , putative Outer membrane protein                                             | -1.5                             |                                  | M                              |
| 330               | HP0325            | JHP0308         | flgH             | flagellar basal-body L-ring protein , FLAGELLAR L-RING PROTEIN PRECURSOR (BASAL BODY L-RING PROTEIN) | -5.5                             |                                  | M                              |
| 344               | HP0338            | JHP0320         |                  |                                                                                                      | 2                                |                                  |                                |
| 347               | HP0341            | N/A             |                  |                                                                                                      | 3                                |                                  |                                |
| 348               | HP0342            | N/A             |                  |                                                                                                      | 0.5                              |                                  |                                |
| 349               | HP0343            | N/A             |                  |                                                                                                      | 0.5                              |                                  |                                |
| 350               | HP0344            | N/A             |                  |                                                                                                      | 2                                |                                  |                                |
| 351               | HP0345            | N/A             |                  |                                                                                                      | 2                                |                                  |                                |
| 353               | HP0347            | JHP0321         | rluD1            | Predicted ribosomal large subunit pseudouridine synthase D                                           | -1.5                             |                                  | M                              |
| 354               | HP0348            | JHP0322         | recJ             | single-stranded-DNA-specific exonuclease , putative SINGLE-STRANDED-DNA-SPECIFIC EXONUCLEASE RECJ    | -0.5                             |                                  |                                |
| 356               | HP0350            | JHP0324         |                  |                                                                                                      | -2                               |                                  | M                              |
| 357               | HP0351            | JHP0325         | fliF             | flagellar basal-body M-ring protein , FLAGELLAR M-RING PROTEIN                                       | 1                                |                                  |                                |
| 358               | HP0352            | JHP0326         | fliG             | flagellar motor switch protein                                                                       | 1                                |                                  |                                |
| 360               | HP0354            | JHP0328         | dxs              | deoxyxylulose-5-phosphate synthase, putative , 1-DEOXYXYLULOSE-5-PHOSPHATE SYNTHASE                  | 1.5                              |                                  |                                |
| 361               | HP0355            | JHP0329         | lepA             | GTP-binding membrane protein , GTP-BINDING PROTEIN                                                   | 2                                |                                  |                                |
| 362               | HP0356            | JHP0330         |                  |                                                                                                      | 0                                |                                  |                                |
| 363               | N/A               | JHP0331         |                  |                                                                                                      | -1                               |                                  |                                |
| 364               | HP0357            | JHP1023         |                  | short chain alcohol dehydrogenase, putative oxidoreductase                                           | -3                               |                                  | M                              |
| 367               | HP0360            | JHP1020         | galE             | UDP-glucose 4-epimerase                                                                              | -4.5                             |                                  | M                              |
| 368               | HP0361            | JHP1019         | hisT, truA       | pseudouridylate synthase I                                                                           | 0.5                              |                                  |                                |

Supplemental Table 4

| Pseudo Gene Order | 26695 Gene Number | J99 Gene Number | Gene Name    | Gene Description                                                                              | NSH57 Screen Totals <sup>a</sup> | NSH79 Screen Totals <sup>a</sup> | Candidate Mutants <sup>b</sup> |
|-------------------|-------------------|-----------------|--------------|-----------------------------------------------------------------------------------------------|----------------------------------|----------------------------------|--------------------------------|
| 370               | HP0363            | JHP1017         | pcm          | L-isoaspartyl-protein carboxyl methyltransferase , PROTEIN-L-ISOASPARTATE O-METHYLTRANSFERASE | 1                                |                                  |                                |
| 373               | HP0366            | JHP1015         |              | spore coat polysaccharide biosynthesis protein C, putative SUGAR NUCLEOTIDE BIOSYNTHESIS      |                                  | -9                               | M                              |
| 375               | HP0368            | JHP1013         | -            | Non-functional type II restriction endonuclease                                               | -0.5                             | -4                               | D                              |
| 376               | HP0369            | JHP1012         |              | putative TYPE II DNA MODIFICATION ENZYME (METHYLTRANSFERASE)                                  | -0.5                             | -4                               | D                              |
| 379               | HP0372            | JHP1009         | dcd          | deoxycytidine triphosphate deaminase                                                          |                                  | -8.5                             | M                              |
| 380               | HP0373            | JHP1008         |              | conserved hypothetical protein, putative outer membrane protein                               |                                  | -0.5                             |                                |
| 387               | HP0380            | JHP1001         | gdhA         | glutamate dehydrogenase                                                                       | 19                               |                                  |                                |
| 388               | HP0381            | JHP1000         | hemK, hemG   | protoporphyrinogen oxidase                                                                    |                                  | 0.5                              |                                |
| 390               | HP0383            | JHP0998         |              |                                                                                               |                                  | 1                                |                                |
| 396               | HP0389            | JHP0992         | sodB, sodF   | superoxide dismutase , iron-dependent superoxide dismutase                                    |                                  | -2.5                             | M                              |
| 397               | HP0390            | JHP0991         | tagD, tpx    | adhesin-thiol peroxidase , THIOL PEROXIDASE                                                   | 0                                |                                  |                                |
| 398               | HP0391            | JHP0990         | cheW         | purine-binding chemotaxis protein , histidine kinase - MCP coupling protein                   | 1                                | -3.5                             | D                              |
| 399               | HP0392            | JHP0989         | cheA         | histidine kinase                                                                              | 11                               | -10                              | D                              |
| 400               | HP0393            | JHP0988         | cheV, cheV_3 | chemotaxis protein , putative chemotaxis protein                                              | 3                                | 0.5                              |                                |
| 401               | HP0394            | JHP0987         |              |                                                                                               | 2                                | -2                               | D                              |
| 403               | HP0396            | JHP0985         | ubiD         | Predicted 3-octaprenyl-4-hydroxybenzoate carboxy-lyase                                        |                                  | 0.5                              |                                |
| 404               | HP0397            | JHP0984         | serA         | phosphoglycerate dehydrogenase , D-3-PHOSPHOGLYCERATE DEHYDROGENASE                           |                                  | 1                                |                                |
| 407               | HP0400            | JHP0981         | ispH         | Predicted IPP/DMAPP synthetase (previously annotated as lysis tolerance protein LytB)         |                                  | 1                                |                                |

Supplemental Table 4

| Pseudo Gene Order | 26695 Gene Number | J99 Gene Number | Gene Name    | Gene Description                                                                             | NSH57 Screen Totals <sup>a</sup> | NSH79 Screen Totals <sup>a</sup> | Candidate Mutants <sup>b</sup> |
|-------------------|-------------------|-----------------|--------------|----------------------------------------------------------------------------------------------|----------------------------------|----------------------------------|--------------------------------|
| 408               | HP0401            | JHP0980         | aroA         | 3-phosphoshikimate 1-carboxyvinyltransferase , 3-PHOSPHOSHIKIMATE 1-CARBOXYVINYL TRANSFERASE | 3.5                              |                                  |                                |
| 410               | HP0403            | JHP0978         | pheS         | phenylalanyl-tRNA synthetase, alpha subunit , PHENYLALANYL-TRNA SYNTHETASE ALPHA CHAIN       | 3.5                              |                                  |                                |
| 413               | HP0406            | JHP0975         |              |                                                                                              | 0                                |                                  |                                |
| 414               | HP0407            | JHP0974         | bisC         | biotin sulfoxide reductase , putative S/N-oxide reductase                                    |                                  | -4.5                             | M                              |
| 416               | HP0409            | JHP0972         | guaA         | GMP synthase , GMP SYNTHETASE                                                                |                                  | -0.5                             |                                |
| 427               | HP0420            | JHP0964         |              |                                                                                              | 2                                |                                  |                                |
| 431               | N/A               | JHP0955         |              |                                                                                              |                                  | 0                                |                                |
| 432               | N/A               | JHP0956         |              |                                                                                              |                                  | 0                                |                                |
| 433               | N/A               | JHP0957         |              |                                                                                              |                                  | -2                               | M                              |
| 437               | N/A               | JHP0961         |              |                                                                                              |                                  | 0.5                              |                                |
| 439               | HP0423            | N/A             |              |                                                                                              | 0                                |                                  |                                |
| 440               | HP0424            | N/A             |              |                                                                                              | 0                                | 2                                |                                |
| 441               | HP0425            | N/A             |              |                                                                                              |                                  | -4.5                             | M                              |
| 442               | HP0426            | N/A             |              |                                                                                              | 1                                | -2                               | D                              |
| 444               | HP0428            | N/A             |              | phage/colicin/tellurite resistance cluster terY protein                                      | -0.5                             |                                  |                                |
| 445               | HP0429            | N/A             |              |                                                                                              | -0.5                             |                                  |                                |
| 453               | HP0437            | N/A             | tnpA         | IS605 transposase                                                                            | -3                               |                                  | M                              |
| 454               | HP0438            | N/A             | tnpB         | IS605 transposase                                                                            | -5                               |                                  | M                              |
| 466               | HP0450            | N/A             |              |                                                                                              | 1                                |                                  |                                |
| 469               | HP0453            | N/A             |              |                                                                                              | 1                                |                                  |                                |
| 470               | HP0454            | N/A             |              |                                                                                              | -2                               |                                  | M                              |
| 478               | HP0462            | N/A             | hsdS         | type I restriction enzyme S protein                                                          | 1                                |                                  |                                |
| 479               | HP0463            | JHP0415         | hsdM, hsdM_1 | type I restriction enzyme M protein , TYPE I RESTRICTION ENZYME (MODIFICATION SUBUNIT)       |                                  | 3.5                              |                                |
| 481               | HP0465            | JHP0417         |              | conserved hypothetical protein                                                               |                                  | 0.5                              |                                |
| 482               | HP0466            | JHP0418         |              | conserved hypothetical protein                                                               | -3                               |                                  | M                              |
| 487               | HP0471            | JHP0423         | kefB         | glutathione-regulated potassium-efflux system protein                                        |                                  | 0                                |                                |

Supplemental Table 4

| Pseudo Gene Order | 26695 Gene Number | J99 Gene Number | Gene Name    | Gene Description                                                                                      | NSH57 Screen Totals <sup>a</sup> | NSH79 Screen Totals <sup>a</sup> | Candidate Mutants <sup>b</sup> |
|-------------------|-------------------|-----------------|--------------|-------------------------------------------------------------------------------------------------------|----------------------------------|----------------------------------|--------------------------------|
| 490               | HP0474            | JHP0426         | modB         | molybdenum ABC transporter, permease protein , Molybdate ABC transporter, permease                    | -2                               |                                  | M                              |
| 491               | HP0475            | JHP0427         | modD, modC   | molybdenum ABC transporter, ATP-binding protein , Molybdate ABC transporter, ATP-binding protein      | 1                                | -0.5                             |                                |
| 492               | HP0476            | JHP0428         | gltX, gltX_1 | glutamyl-tRNA synthetase                                                                              |                                  | -0.5                             |                                |
| 493               | HP0477            | JHP0429         | omp12        | outer membrane protein , putative Outer membrane protein                                              | 1                                | 0.5                              |                                |
| 494               | HP0478            | JHP0430         | VSPIM        | adenine specific DNA methyltransferase , TYPE II DNA MODIFICATION ENZYME (METHYLTRANSFERASE)          | 0.5                              | -0.5                             |                                |
| 495               | HP0479            | JHP0431         | -            | Non-functional type II restriction endonuclease                                                       | -1                               |                                  |                                |
| 496               | HP0480            | JHP0432         | yihK         | GTP-binding protein, fusA-homolog                                                                     | -0.5                             |                                  |                                |
| 497               | HP0481            | JHP0433         | MFOK I       | adenine specific DNA methyltransferase , putative TYPE II DNA MODIFICATION ENZYME (METHYLTRANSFERASE) | 0                                | -6.5                             | D                              |
| 498               | HP0482            | JHP0434         | -            | Non-functional type II restriction endonuclease                                                       | 1                                | -11.5                            | D                              |
| 499               | HP0483            | JHP0435         |              | TYPE II DNA MODIFICATION ENZYME (METHYLTRANSFERASE)                                                   | -2                               | -5                               | B                              |
| 500               | HP0484            | JHP0436         | -            | Non-functional type II restriction endonuclease                                                       | 0                                |                                  |                                |
| 501               | HP0485            | JHP0437         | -            | Predicted catalase-like protein                                                                       | 1                                | -1                               |                                |
| 502               | HP0486            | JHP0438         |              | Outer membrane protein                                                                                |                                  | -1                               |                                |
| 503               | HP0487            | JHP0439         |              | putative Outer membrane protein                                                                       | -1                               |                                  |                                |
| 505               | HP0489            | JHP0441         |              |                                                                                                       | 1.5                              |                                  |                                |
| 506               | HP0490            | JHP0442         |              | putative potassium channel protein, putative, PUTATIVE POTASSIUM CHANNEL PROTEIN                      | 1.5                              |                                  |                                |
| 509               | HP0493            | JHP0445         | mraY         | phospho-N-acetylmuramoyl-pentapeptide-transferase                                                     |                                  | 0.5                              |                                |
| 510               | HP0494            | JHP0446         | murD         | UDP-N-acetylmuramoylalanine-D-glutamate ligase , UDP-N-ACETYLMURAMOYLALANINE--D-GLUTAMATE LIGASE      |                                  | 0.5                              |                                |
| 512               | HP0496            | JHP0448         |              | conserved hypothetical protein                                                                        |                                  | -4.5                             | M                              |

Supplemental Table 4

| Pseudo Gene Order | 26695 Gene Number | J99 Gene Number | Gene Name      | Gene Description                                                            | NSH57 Screen Totals <sup>a</sup> | NSH79 Screen Totals <sup>a</sup> | Candidate Mutants <sup>b</sup> |
|-------------------|-------------------|-----------------|----------------|-----------------------------------------------------------------------------|----------------------------------|----------------------------------|--------------------------------|
| 513               | HP0497            | JHP0449         |                | sodium- and chloride-dependent transporter, putative transporter            |                                  | -12.5                            | M                              |
| 514               | HP0498            | JHP0450         |                | sodium- and chloride-dependent transporter, putative transporter            | -3.5                             | -16                              | B                              |
| 515               | HP0499            | JHP0451         | pldA           | phospholipase A1 precursor (DR-phospholipase A), putative PHOSPHOLIPASE A1  | -0.5                             | 4                                |                                |
| 517               | HP0501            | JHP0453         | gyrB           | DNA gyrase, sub B , DNA GYRASE SUBUNIT B                                    | 1                                | 0.5                              |                                |
| 518               | HP0502            | JHP0454         |                |                                                                             | -4                               | 0.5                              | D                              |
| 519               | HP0503            | JHP0454         |                |                                                                             | -4                               | -3                               | B                              |
| 520               | HP0504            | JHP0455         |                |                                                                             | -1.5                             |                                  | M                              |
| 521               | HP0505            | JHP0455         |                |                                                                             | -1.5                             |                                  | M                              |
| 522               | HP0506            | JHP0456         |                | conserved hypothetical secreted protein, putative Outer membrane protein    | 0                                |                                  |                                |
| 533               | HP0517            | JHP0466         | era            | GTP-binding protein                                                         | 5                                | 4.5                              |                                |
| 534               | HP0518            | JHP0467         |                | conserved hypothetical secreted protein                                     | 2                                |                                  |                                |
| 535               | HP0519            | JHP0468         |                | conserved hypothetical protein                                              | -0.5                             | 0.5                              |                                |
| 536               | HP0520            | JHP0469         | cag1, orf6     | cag pathogenicity island protein , putative cag island protein              | 0.5                              |                                  |                                |
| 537               | HP0521            | JHP0470         | orf7           | cag island protein                                                          | 3.5                              |                                  |                                |
| 538               | HP0522            | JHP0471         | cag3, orf8     | cag pathogenicity island protein , cag island protein                       | 0.5                              | 0                                |                                |
| 539               | HP0523            | JHP0472         | cag4, orf9     | cag pathogenicity island protein , cag island protein                       | -0.5                             | -1                               |                                |
| 540               | HP0524            | JHP0473         | cag5, virD4    | cag pathogenicity island protein , cag island protein, DNA transfer protein | 0.5                              | 0                                |                                |
| 541               | HP0525            | JHP0474         | virB11 _1      | virB11 homolog, cag island protein, DNA transfer protein                    | 0                                | 1                                |                                |
| 542               | HP0526            | JHP0475         | cag6, orf12    | cag pathogenicity island protein , cag island protein                       | -1                               |                                  |                                |
| 543               | HP0527            | JHP0476         | cag7, orf13/14 | cag pathogenicity island protein , cag island protein                       | 0.5                              |                                  |                                |
| 544               | HP0528            | JHP0477         | cag8, orf15    | cag pathogenicity island protein , cag island protein                       | 2                                | -8.5                             | D                              |
| 545               | HP0529            | JHP0478         | cag9, orf16    | cag pathogenicity island protein , cag island protein                       | 0.5                              | -6                               | D                              |



Supplemental Table 4

| Pseudo Gene Order | 26695 Gene Number | J99 Gene Number | Gene Name    | Gene Description                                                                      | NSH57 Screen Totals <sup>a</sup> | NSH79 Screen Totals <sup>a</sup> | Candidate Mutants <sup>b</sup> |
|-------------------|-------------------|-----------------|--------------|---------------------------------------------------------------------------------------|----------------------------------|----------------------------------|--------------------------------|
| 546               | HP0530            | JHP0479         | cag10, orf17 | cag pathogenicity island protein , cag island protein                                 |                                  | -1                               |                                |
| 551               | HP0535            | JHP0483         | cag14, cagQ  | cag pathogenicity island protein , cag island protein                                 | -1.5                             | -1                               | D                              |
| 552               | HP0536            | JHP0484         | cag15, cagP  | cag pathogenicity island protein , cag island protein                                 | -1.5                             |                                  | M                              |
| 554               | HP0538            | JHP0486         | cag17, cagN  | cag pathogenicity island protein , cag island protein                                 |                                  | -4                               | M                              |
| 555               | HP0539            | JHP0487         | cag18, cagL  | cag pathogenicity island protein , cag island protein                                 |                                  | -4                               | M                              |
| 559               | HP0543            | JHP0491         | cag22, cagF  | cag pathogenicity island protein , cag island protein                                 |                                  | -0.5                             |                                |
| 560               | HP0544            | JHP0492         | cag23, cagE  | cag pathogenicity island protein , DNA transfer protein (Agrobacterium VirB4 homolog) | -1                               | 0.5                              |                                |
| 582               | HP0566            | JHP0513         | dapF         | diaminopimelate epimerase                                                             |                                  | -1                               |                                |
| 584               | HP0568            | JHP0515         |              |                                                                                       | 5.5                              | 2                                |                                |
| 585               | HP0569            | JHP0516         | gtp1         | GTP-binding protein                                                                   | 1.5                              |                                  |                                |
| 591               | HP0575            | JHP0522         |              | conserved hypothetical membrane protein                                               |                                  | 0.5                              |                                |
| 594               | HP0578            | JHP0525         |              |                                                                                       | 1                                | 2.5                              |                                |
| 595               | HP0579            | JHP0526         |              |                                                                                       |                                  | -0.5                             |                                |
| 596               | HP0580            | JHP0527         |              |                                                                                       |                                  | -4                               | M                              |
| 600               | HP0584            | JHP0531         | fliN         | flagellar switch protein                                                              | 0                                |                                  |                                |
| 601               | HP0585            | JHP0532         | nth          | endonuclease III                                                                      | 0                                |                                  |                                |
| 602               | HP0586            | JHP0534         |              |                                                                                       |                                  | 0                                |                                |
| 603               | HP0587            | JHP0535         | pabC         | aminodeoxychorismate lyase                                                            | -4                               | -1                               | D                              |
| 604               | HP0588            | JHP0536         | oorD         | ferredoxin-like protein, SUBUNIT OF 2-OXOGLUTARATE OXIDOREDUCTASE                     | 1                                | -1                               |                                |
| 609               | HP0592            | N/A             | res          | type III restriction enzyme R protein                                                 | -1                               |                                  |                                |
| 610               | HP0593            | N/A             | mod          | adenine specific DNA methyltransferase                                                | -2                               |                                  | M                              |

Supplemental Table 4

| Pseudo Gene Order | 26695 Gene Number | J99 Gene Number | Gene Name    | Gene Description                                                                                                       | NSH57 Screen Totals <sup>a</sup> | NSH79 Screen Totals <sup>a</sup> | Candidate Mutants <sup>b</sup> |
|-------------------|-------------------|-----------------|--------------|------------------------------------------------------------------------------------------------------------------------|----------------------------------|----------------------------------|--------------------------------|
| 612               | HP0595            | JHP0542         |              |                                                                                                                        | 0.5                              |                                  |                                |
| 613               | HP0596            | JHP0543         |              |                                                                                                                        | 0.5                              |                                  |                                |
| 616               | HP0599            | JHP0546         | hylB         | hemolysin secretion protein precursor , methyl-accepting chemotaxis protein (MCP)                                      | -0.5                             |                                  |                                |
| 617               | HP0600            | JHP0547         | spaB         | multidrug resistance protein , putative secretion/efflux abc transporter, ATP-binding protein                          | -4.5                             | 1                                | D                              |
| 618               | HP0601            | JHP0548         | flaA         | flagellin A                                                                                                            |                                  | -1                               |                                |
| 619               | HP0602            | JHP0549         | magIII       | 3-methyladenine DNA glycosylase (previously annotated as an endonuclease III)                                          | -2                               | -1                               | D                              |
| 620               | HP0603            | JHP0550         |              |                                                                                                                        | 0                                | 0                                |                                |
| 626               | HP0609            | JHP0556         |              | putative vacuolating cytotoxin (VacA) paralog                                                                          | 7                                | -1.5                             | D                              |
| 627               | HP0610            | JHP0556         |              | toxin-like outer membrane protein                                                                                      | -1                               | 0.5                              |                                |
| 628               | HP0611            | JHP0299         |              |                                                                                                                        | 2                                |                                  |                                |
| 629               | HP0612            | JHP0299         |              |                                                                                                                        |                                  | 2                                |                                |
| 632               | HP0615            | JHP0558         | lig          | DNA ligase                                                                                                             |                                  | 0.5                              |                                |
| 633               | HP0616            | JHP0559         | cheV, cheV_2 | chemotaxis protein , putative chemotaxis protein                                                                       |                                  | 1                                |                                |
| 634               | HP0617            | JHP0560         | aspS         | aspartyl-tRNA synthetase                                                                                               |                                  | 0.5                              |                                |
| 644               | HP0626            | JHP0570         | dapD         | tetrahydrodipicolinate N-succinyltransferase , putative 2,3,4,5-TETRAHYDROPYRIDINE-2-CARBOXYLATE N-SUCCINYLTRANSFERASE | 0                                |                                  |                                |
| 645               | HP0627            | JHP0571         | hcpF         | Cysteine-rich protein F                                                                                                | -8                               | 0.5                              | D                              |
| 646               | HP0628            | JHP0571         |              |                                                                                                                        | -5                               | 1                                | D                              |
| 647               | HP0629            | JHP0572         |              |                                                                                                                        | -7.5                             |                                  | M                              |
| 648               | HP0630            | JHP0573         | mda66        | modulator of drug activity                                                                                             | 4                                | 4                                |                                |
| 649               | HP0631            | JHP0574         | hydA, hyaA   | quinone-reactive Ni/Fe hydrogenase, small subunit , Hydrogenase, small subunit                                         | -0.5                             | 1.5                              |                                |

Supplemental Table 4

| Pseudo Gene Order | 26695 Gene Number | J99 Gene Number | Gene Name    | Gene Description                                                                           | NSH57 Screen Totals <sup>a</sup> | NSH79 Screen Totals <sup>a</sup> | Candidate Mutants <sup>b</sup> |
|-------------------|-------------------|-----------------|--------------|--------------------------------------------------------------------------------------------|----------------------------------|----------------------------------|--------------------------------|
| 650               | HP0632            | JHP0575         | hydB, hyaB   | quinone-reactive Ni/Fe hydrogenase, large subunit , Hydrogenase, large subunit             |                                  | -2.5                             | M                              |
| 651               | HP0633            | JHP0576         | hydC, hyaC   | quinone-reactive Ni/Fe hydrogenase, cytochrome b subunit , Hydrogenase, cytochrome subunit | -7                               | -9.5                             | B                              |
| 652               | HP0634            | JHP0577         | hydD, hyaD   | quinone-reactive Ni/Fe hydrogenase , Hydrogenase expression/formation protein              | 4                                | 1.5                              |                                |
| 653               | HP0635            | JHP0578         |              |                                                                                            |                                  | -10                              | M                              |
| 654               | HP0636            | JHP0579         |              |                                                                                            |                                  | -0.5                             |                                |
| 655               | HP0637            | JHP0580         |              |                                                                                            |                                  | -1                               |                                |
| 657               | HP0639            | JHP0582         | exsB         | Predicted trans-regulatory protein                                                         |                                  | 0.5                              |                                |
| 658               | HP0640            | JHP0583         | papS, pcnB   | poly(A) polymerase , POLYNUCLEOTIDE ADENYLYLTRANSFERASE                                    | 0                                | 0.5                              |                                |
| 660               | N/A               | JHP0585         |              | putative 3-HYDROXYACID DEHYDROGENASE                                                       |                                  | 1                                |                                |
| 661               | HP0642            | JHP0586         |              | NAD(P)H-flavin oxidoreductase, putative Oxidoreductase                                     | 1                                | 7.5                              |                                |
| 662               | N/A               | JHP0587         |              |                                                                                            |                                  | 1.5                              |                                |
| 663               | HP0643            | JHP0588         | gltX, gltX_2 | glutamyl-tRNA synthetase                                                                   |                                  | 6                                |                                |
| 671               | HP0651            | JHP0596         | fucT         | fucosyltransferase, ALPHA (1,3)-FUCOSYLTRANSFERASE                                         | 1                                |                                  |                                |
| 673               | HP0653            | JHP0598         | pfr          | nonheme iron-containing ferritin                                                           |                                  | -2.5                             | M                              |
| 674               | HP0654            | JHP0599         |              |                                                                                            |                                  | -2.5                             | M                              |
| 675               | HP0655            | JHP0600         |              | putative Outer membrane protein                                                            | 4                                |                                  |                                |
| 683               | HP0663            | JHP0608         | aroC         | CHORISMATE SYNTHASE                                                                        |                                  | 4                                |                                |
| 686               | HP0666            | JHP0611         | glpC         | glycerol-3-phosphate dehydrogenase                                                         |                                  | -5                               | M                              |
| 687               | HP0667            | JHP0612         | llaGI        | Remnant of type I restriction-modification polypeptide                                     |                                  | -5                               | M                              |
| 688               | HP0668            | JHP0612         |              |                                                                                            | 0                                | 3                                |                                |
| 689               | HP0669            | JHP0613         |              |                                                                                            | -1                               | 2                                |                                |

Supplemental Table 4

| Pseudo Gene Order | 26695 Gene Number | J99 Gene Number | Gene Name    | Gene Description                                                                                          | NSH57 Screen Totals <sup>a</sup> | NSH79 Screen Totals <sup>a</sup> | Candidate Mutants <sup>b</sup> |
|-------------------|-------------------|-----------------|--------------|-----------------------------------------------------------------------------------------------------------|----------------------------------|----------------------------------|--------------------------------|
| 691               | HP0671            | JHP0614         | omp14        | outer membrane protein , putative Outer membrane protein                                                  |                                  | 2                                |                                |
| 696               | HP0675            | JHP0617         | xerC         | integrase/recombinase , INTEGRASE-RECOMBINASE PROTEIN (XERCD FAMILY)                                      |                                  | -2.5                             | M                              |
| 697               | HP0676            | JHP0618         | dat1, ogt    | methylated-DNA--protein-cysteine methyltransferase                                                        |                                  | 0.5                              |                                |
| 698               | HP0677            | JHP0619         |              | conserved hypothetical integral membrane protein                                                          |                                  | -1                               |                                |
| 701               | HP0680            | JHP0621         | nrdA         | ribonucleoside-diphosphate reductase 1 alpha subunit , RIBONUCLEOSIDE-DIPHOSPHATE REDUCTASE 1 ALPHA CHAIN |                                  | -3.5                             | M                              |
| 702               | HP0681            | JHP0622         |              |                                                                                                           |                                  | -2                               | M                              |
| 703               | HP0682            | JHP0623         |              |                                                                                                           |                                  | -1.5                             | M                              |
| 706               | HP0685            | JHP0625         | fliP         | flagellar biosynthetic protein                                                                            |                                  | 0                                |                                |
| 707               | HP0686            | JHP0626         | fecA, fecA_1 | iron(III) dicitrate transport protein                                                                     | 1                                | 3.5                              |                                |
| 709               | HP0688            | JHP0628         |              |                                                                                                           |                                  | 0.5                              |                                |
| 710               | HP0689            | JHP0628         |              |                                                                                                           |                                  | 4                                |                                |
| 711               | HP0690            | JHP0638         | fadA, thl    | acetyl coenzyme A acetyltransferase(thiolase) , ACETYL-COA ACETYLTRANSFERASE                              | 5                                | 4.5                              |                                |
| 712               | HP0691            | JHP0637         | scoA         | Succinyl-CoA-transferase subunit A (previously annotated as involved in phospholipid synthesis)           | 7                                | 4.5                              |                                |
| 714               | HP0693            | JHP0635         | atoE         | conserved hypothetical integral membrane protein, short-chain fatty acids transporter                     | 23                               | 3                                |                                |
| 715               | HP0694            | JHP0634         |              | putative Outer membrane protein                                                                           | 29                               | -6                               | D                              |
| 716               | HP0695            | JHP0633         | hyuA         | hydantoin utilization protein A , putative HYDANTOIN UTILIZATION                                          | 35                               | 1                                |                                |
| 717               | HP0696            | JHP0632         |              | N-methylhydantoinase, putative HYDANTOIN UTILIZATION                                                      | 1                                | 7                                |                                |
| 718               | HP0697            | JHP0631         |              |                                                                                                           |                                  | 0                                |                                |
| 726               | HP0703            | JHP0643         |              | response regulator, putative TRANSCRIPTIONAL REGULATOR                                                    | -4                               | -1                               | D                              |

Supplemental Table 4

| Pseudo Gene Order | 26695 Gene Number | J99 Gene Number | Gene Name       | Gene Description                                                                                         | NSH57 Screen Totals <sup>a</sup> | NSH79 Screen Totals <sup>a</sup> | Candidate Mutants <sup>b</sup> |
|-------------------|-------------------|-----------------|-----------------|----------------------------------------------------------------------------------------------------------|----------------------------------|----------------------------------|--------------------------------|
| 728               | HP0705            | JHP0644         | uvrA            | excinuclease ABC subunit A ,<br>EXCINUCLEASE ABC SUBUNIT A.                                              |                                  | 1                                |                                |
| 729               | HP0706            | JHP0645         | omp15<br>, hopE | outer membrane protein , Outer<br>membrane protein/porin                                                 |                                  | 0                                |                                |
| 731               | HP0708            | JHP0647         |                 |                                                                                                          |                                  | 2.5                              |                                |
| 732               | HP0709            | JHP0648         |                 | conserved hypothetical protein                                                                           |                                  | 2.5                              |                                |
| 734               | HP0711            | JHP0650         |                 |                                                                                                          | -1                               | -1                               |                                |
| 735               | HP0712            | JHP0651         |                 |                                                                                                          | -1                               |                                  |                                |
| 737               | HP0714            | JHP0652         | rpoN            | RNA polymerase sigma-54 factor                                                                           |                                  | 1                                |                                |
| 738               | HP0715            | JHP0653         |                 | ABC transporter, ATP-binding protein,<br>putative abc transporter, ATP-binding<br>protein                |                                  | 1                                |                                |
| 743               | HP0720            | JHP0657         |                 |                                                                                                          | -0.5                             |                                  |                                |
| 744               | HP0721            | JHP0658         |                 |                                                                                                          | -0.5                             |                                  |                                |
| 745               | HP0722            | JHP0659         |                 | putative Outer membrane protein                                                                          | 1.5                              |                                  |                                |
| 746               | HP0723            | JHP0661         | ansB            | L-asparaginase II                                                                                        | 2.5                              |                                  |                                |
| 747               | HP0724            | JHP0660         | dcuA            | anaerobic C4-dicarboxylate transport<br>protein , ANAEROBIC C4-<br>DICARBOXYLATE MEMBRANE<br>TRANSPORTER | 1                                |                                  |                                |
| 750               | HP0727            | JHP0664         |                 | transcriptional regulator, putative,<br>putative TRANSCRIPTIONAL<br>REGULATOR                            | 0                                | 0.5                              |                                |
| 751               | HP0728            | JHP0665         |                 | conserved hypothetical protein                                                                           |                                  | 0.5                              |                                |
| 757               | HP0734            | JHP0671         |                 | conserved hypothetical protein                                                                           |                                  | 2                                |                                |
| 758               | HP0735            | JHP0672         | gpt             | xanthine guanine phosphoribosyl<br>transferase , XANTHINE-GUANINE<br>PHOSPHORIBOSYLTRANSFERASE           |                                  | 3                                |                                |
| 759               | HP0736            | JHP0673         | serC            | phosphoserine aminotransferase ,<br>putative aminotransferase                                            |                                  | 1                                |                                |
| 774               | HP0751            | JHP0688         | flaG            | polar flagellin , putative FLAGELLIN<br>PROTEIN                                                          | 2                                |                                  |                                |
| 775               | HP0752            | JHP0689         | fliD            | flagellar hook-associated protein 2 ,<br>putative FLAGELLAR HOOK-<br>ASSOCIATED PROTEIN 2 (HAP2)         | 3                                |                                  |                                |

Supplemental Table 4

| Pseudo Gene Order | 26695 Gene Number | J99 Gene Number | Gene Name       | Gene Description                                                                                    | NSH57 Screen Totals <sup>a</sup> | NSH79 Screen Totals <sup>a</sup> | Candidate Mutants <sup>b</sup> |
|-------------------|-------------------|-----------------|-----------------|-----------------------------------------------------------------------------------------------------|----------------------------------|----------------------------------|--------------------------------|
| 776               | HP0753            | JHP0690         | fliS            | flagellar protein , putative<br>FLAGELLAR PROTEIN                                                   | 1                                |                                  |                                |
| 790               | HP0767            | N/A             |                 |                                                                                                     | -0.5                             | -0.5                             |                                |
| 791               | HP0768            | JHP0705         | moaA            | molybdenum cofactor biosynthesis<br>protein A , MOLYBDOPTERIN<br>COFACTOR BIOSYNTHETIC<br>PROTEIN   | -1                               | -0.5                             |                                |
| 792               | HP0769            | JHP0706         | mobA            | molybdopterin-guanine dinucleotide<br>biosynthesis protein A                                        | 0                                | 1.5                              |                                |
| 793               | HP0770            | JHP0707         | flhB,<br>flhB_1 | flagellar biosynthetic protein ,<br>FLAGELLAR BIOSYNTHESIS<br>PROTEIN                               | 3                                | -5                               | D                              |
| 795               | HP0772            | JHP0709         | amiA            | N-acetylmuramoyl-L-alanine amidase<br>, putative PROBABLE N-<br>ACETYLMURAMOYL-L-ALANINE<br>AMIDASE |                                  | -1                               |                                |
| 800               | HP0777            | JHP0714         | pyrH            | uridine 5'-monophosphate (UMP)<br>kinase, URIDYLATE KINASE                                          | 3                                | 9.5                              |                                |
| 801               | HP0778            | JHP0715         |                 |                                                                                                     |                                  | 0.5                              |                                |
| 802               | HP0779            | JHP0716         | acnB            | aconitase B , ACONITATE<br>HYDRATASE                                                                |                                  | 3.5                              |                                |
| 803               | HP0780            | JHP0717         |                 |                                                                                                     | -0.5                             |                                  |                                |
| 804               | HP0781            | JHP0718         |                 |                                                                                                     | 0.5                              | -0.5                             |                                |
| 805               | HP0782            | JHP0719         |                 | putative Outer membrane protein                                                                     | -2.5                             | 1                                | D                              |
| 806               | HP0783            | JHP0720         |                 |                                                                                                     | -0.5                             |                                  |                                |
| 810               | HP0787            | JHP0724         | lolC            | Predicted lipoprotein releasing system                                                              | 0.5                              | -3                               | D                              |
| 811               | HP0788            | JHP0725         |                 | putative Outer membrane protein                                                                     | 4.5                              | -1.5                             | D                              |
| 812               | HP0789            | N/A             |                 |                                                                                                     |                                  | -2                               | M                              |
| 813               | HP0790            | N/A             | prdB            | anti-codon nuclease masking agent                                                                   | -5                               | -3.5                             | B                              |
| 814               | N/A               | JHP0726         | hsdS_4          | putative TYPE I RESTRICTION<br>ENZYME (SPECIFICITY SUBUNIT)                                         | 5.5                              | -6                               | D                              |
| 815               | HP0791            | JHP0727         | cadA,<br>hmcT   | cadmium-transporting ATPase, P-type<br>, putative HEAVY-METAL CATION-<br>TRANSPORTING P-TYPE ATPASE | -0.5                             |                                  |                                |
| 819               | HP0795            | JHP0731         | tig             | trigger factor                                                                                      |                                  | -0.5                             |                                |
| 820               | HP0796            | JHP0732         | omp18           | outer membrane protein , putative<br>Outer membrane protein                                         |                                  | -10                              | M                              |

Supplemental Table 4

| Pseudo Gene Order | 26695 Gene Number | J99 Gene Number    | Gene Name    | Gene Description                                                                                                  | NSH57 Screen Totals <sup>a</sup> | NSH79 Screen Totals <sup>a</sup> | Candidate Mutants <sup>b</sup> |
|-------------------|-------------------|--------------------|--------------|-------------------------------------------------------------------------------------------------------------------|----------------------------------|----------------------------------|--------------------------------|
| 821               | HP0797            | JHP0733            | hpaA         | flagellar sheath adhesin hpaA, NEURAMINYLLACTOSE-BINDING HEMAGGLUTININ PRECURSOR                                  |                                  | -1.5                             | M                              |
| 824               | HP0800            | JHP0736            | moaE         | molybdopterin converting factor, subunit 2                                                                        |                                  | 5.5                              |                                |
| 825               | HP0801            | JHP0737            | moaD         | molybdopterin converting factor, subunit 1, putative MOLYBDOPTERIN CONVERTING FACTOR, SUBUNIT 1                   |                                  | 0.5                              |                                |
| 826               | HP0802            | JHP0738            | ribA         | GTP cyclohydrolase II                                                                                             |                                  | 0                                |                                |
| 829               | HP0805            | JHP0741            | lex2B        | lipooligosaccharide 5G8 epitope biosynthesis-associated protein, putative lipopolysaccharide biosynthesis protein | 0                                |                                  |                                |
| 831               | HP0807            | JHP0743            | fecA, fecA_2 | iron(III) dicitrate transport protein                                                                             |                                  | 2                                |                                |
| 835               | HP0811            | JHP0747            |              |                                                                                                                   | -0.5                             | -2                               | D                              |
| 836               | HP0812            | JHP0748            |              |                                                                                                                   | -0.5                             | -2                               | D                              |
| 837               | HP0813            | JHP0749            |              | conserved hypothetical protein                                                                                    |                                  | 1                                |                                |
| 839               | HP0815            | JHP0751            | motA         | flagellar motor rotation protein, putative CHEMOTAXIS PROTEIN (MOTILITY PROTEIN A)                                | -1                               |                                  |                                |
| 840               | N/A               | JHP0755            |              |                                                                                                                   | -1                               |                                  |                                |
| 841               | N/A               | JHP0756            |              | putative TYPE II DNA MODIFICATION ENZYME (METHYLTRANSFERASE)                                                      | -0.5                             |                                  |                                |
| 842               | HP0816            | JHP0752            | motB         | flagellar motor rotation protein, FLAGELLAR MOTOR PROTEIN                                                         | -0.5                             |                                  |                                |
| 843               | HP0817            | JHP0753            |              |                                                                                                                   |                                  | -0.5                             |                                |
| 844               | HP0818            | JHP0754<br>JHP0757 | proW<br>X    | osmoprotection protein                                                                                            |                                  | -0.5                             |                                |
| 848               | HP0822            | JHP0761            | metL,<br>hom | homoserine dehydrogenase                                                                                          | 3                                | -0.5                             |                                |
| 849               | HP0823            | JHP0762            |              | conserved hypothetical protein                                                                                    | 3                                |                                  |                                |
| 850               | HP0824            | JHP0763            | trxA         | thioredoxin                                                                                                       | 1                                |                                  |                                |

Supplemental Table 4

| Pseudo Gene Order | 26695 Gene Number | J99 Gene Number | Gene Name    | Gene Description                                                                                                   | NSH57 Screen Totals <sup>a</sup> | NSH79 Screen Totals <sup>a</sup> | Candidate Mutants <sup>b</sup> |
|-------------------|-------------------|-----------------|--------------|--------------------------------------------------------------------------------------------------------------------|----------------------------------|----------------------------------|--------------------------------|
| 851               | HP0825            | JHP0764         | trxB, trxB_1 | thioredoxin reductase                                                                                              | -0.5                             | -2.5                             | D                              |
| 852               | HP0826            | JHP0765         | lex2B        | lipooligosaccharide 5G8 epitope biosynthesis-associated protein , putative lipopolysaccharide biosynthesis protein | -5.5                             | -2.5                             | B                              |
| 853               | HP0827            | JHP0766         |              | ss-DNA binding protein 12RNP2 precursor                                                                            |                                  | -0.5                             |                                |
| 854               | HP0828            | JHP0767         | atpB         | ATP synthase F0, subunit a                                                                                         | 0.5                              | 1                                |                                |
| 855               | HP0829            | JHP0768         | guaB         | inosine-5'-monophosphate dehydrogenase                                                                             | 12                               | 1.5                              |                                |
| 857               | HP0831            | JHP0770         | coaE         | Predicted dephospho-CoA kinase                                                                                     | 13                               | 2                                |                                |
| 858               | HP0832            | JHP0771         | speE         | spermidine synthase , putative spermidine synthase                                                                 |                                  | 1                                |                                |
| 859               | HP0833            | JHP0772         |              |                                                                                                                    | 3                                | 5.5                              |                                |
| 860               | HP0834            | JHP0773         | engA         | Predicted GTP-binding protein                                                                                      |                                  | -0.5                             |                                |
| 865               | HP0839            | JHP0777         | ompP 1       | outer membrane protein P1 , putative Outer membrane protein                                                        | 1                                | 2                                |                                |
| 867               | HP0841            | JHP0779         | dfp          | pantothenate metabolism flavoprotein                                                                               | -1                               |                                  |                                |
| 868               | HP0842            | JHP0780         |              |                                                                                                                    | -1                               |                                  |                                |
| 869               | HP0843            | JHP0781         | thiB, thiE   | thiamin phosphate pyrophosphorylase/hydroxyethylthiazole kinase , THIAMINE PHOSPHATE PYROPHOSPHORYLASE             | 0                                | 1.5                              |                                |
| 870               | HP0844            | JHP0782         | thi, thiD    | thiamine biosynthesis protein , PHOSPHOMETHYLPYRIMIDINE KINASE                                                     | 0                                | 3                                |                                |
| 871               | HP0845            | JHP0783         | thiM         | thiamin phosphate pyrophosphorylase/hydroxyethylthiazole kinase , HYDROXYETHYLTHIAZOLE KINASE                      | 5                                |                                  |                                |
| 872               | HP0846            | JHP0784         | hsdR, hsdR_2 | type I restriction enzyme R protein , TYPE I RESTRICTION ENZYME (RESTRICTION SUBUNIT)                              | 1                                | -2                               | D                              |
| 873               | HP0847            | N/A             |              |                                                                                                                    |                                  | -5                               | M                              |
| 876               | HP0850            | JHP0786         | hsdM, hsdM_2 | type I restriction enzyme M protein , TYPE I RESTRICTION ENZYME (MODIFICATION SUBUNIT)                             | 1                                |                                  |                                |



Supplemental Table 4

| Pseudo Gene Order | 26695 Gene Number | J99 Gene Number | Gene Name       | Gene Description                                                                                                              | NSH57 Screen Totals <sup>a</sup> | NSH79 Screen Totals <sup>a</sup> | Candidate Mutants <sup>b</sup> |
|-------------------|-------------------|-----------------|-----------------|-------------------------------------------------------------------------------------------------------------------------------|----------------------------------|----------------------------------|--------------------------------|
| 877               | HP0851            | JHP0787         |                 | conserved hypothetical integral membrane protein                                                                              | 4.5                              |                                  |                                |
| 878               | HP0852            | JHP0788         |                 |                                                                                                                               | 0.5                              | -2                               | D                              |
| 880               | HP0854            | JHP0790         | guaC            | GMP reductase                                                                                                                 | 1.5                              | 2                                |                                |
| 883               | HP0857            | JHP0791         | gmhA            | phosphoheptose isomerase                                                                                                      | 0.5                              |                                  |                                |
| 893               | HP0867            | JHP0801         | lpxB            | lipid A disaccharide synthetase ,<br>LIPID-A-DISACCHARIDE<br>SYNTHASE                                                         | -5                               | 0.5                              | D                              |
| 894               | HP0868            | JHP0802         |                 |                                                                                                                               | -3                               |                                  | M                              |
| 895               | HP0869            | JHP0803         | hypA            | hydrogenase expression/formation<br>protein                                                                                   | -3                               |                                  | M                              |
| 896               | HP0870            | JHP0804         | flgE            | flagellar hook , FLAGELLAR HOOK<br>PROTEIN                                                                                    | -4                               | 10.5                             | D                              |
| 897               | HP0871            | JHP0805         | cdh             | CDP-diglyceride hydrolase , CDP-<br>DIACYLGLYCEROL<br>PYROPHOSPHATASE                                                         |                                  | 3.5                              |                                |
| 898               | HP0872            | JHP0806         | phnA            | alkylphosphonate uptake protein ,<br>putative ALKYLPHOSPHONATE<br>UPTAKE PROTEIN                                              |                                  | 0.5                              |                                |
| 899               | HP0873            | JHP0807         |                 |                                                                                                                               |                                  | 0.5                              |                                |
| 900               | HP0874            | JHP0808         |                 |                                                                                                                               |                                  | 6.5                              |                                |
| 901               | HP0875            | JHP0809         | katA            | catalase                                                                                                                      | 5.5                              | -0.5                             |                                |
| 902               | HP0876            | JHP0810         | frpB,<br>frpB_1 | iron-regulated outer membrane<br>protein , putative IRON-REGULATED<br>OUTER MEMBRANE PROTEIN                                  | -3.5                             | 7.5                              | D                              |
| 903               | HP0877            | JHP0811         | ruvC            | Holliday junction<br>endodeoxyribonuclease ,<br>CROSSOVER JUNCTION<br>ENDODEOXYRIBONUCLEASE                                   | -1                               |                                  |                                |
| 904               | HP0878            | JHP0812         |                 |                                                                                                                               | -1                               |                                  |                                |
| 905               | HP0879            | JHP0812         |                 |                                                                                                                               |                                  | -3                               | M                              |
| 915               | HP0887            | JHP0819         | vacA            | vacuolating cytotoxin                                                                                                         |                                  | 0                                |                                |
| 917               | HP0888            | JHP0821         | fecE            | iron(III) dicitrate ABC transporter, ATP-<br>binding protein, IRON(III) DICITRATE<br>TRANSPORT SYSTEM ATP-<br>BINDING PROTEIN | 0.5                              |                                  |                                |

Supplemental Table 4

| Pseudo Gene Order | 26695 Gene Number | J99 Gene Number | Gene Name    | Gene Description                                                                                              | NSH57 Screen Totals <sup>a</sup> | NSH79 Screen Totals <sup>a</sup> | Candidate Mutants <sup>b</sup> |
|-------------------|-------------------|-----------------|--------------|---------------------------------------------------------------------------------------------------------------|----------------------------------|----------------------------------|--------------------------------|
| 918               | HP0889            | JHP0822         | fecD         | iron(III) dicitrate ABC transporter, permease protein , IRON(III) DICITRATE TRANSPORT SYSTEM PERMEASE PROTEIN | 0                                |                                  |                                |
| 919               | HP0890            | JHP0823         | vdIC         | Predicted short-chain oxidoreductase                                                                          | 1                                |                                  |                                |
| 920               | HP0891            | JHP0824         | vdID         | Predicted acyl coenzyme A thioesterase                                                                        | -0.5                             |                                  |                                |
| 925               | HP0896            | JHP1164         | omp19 , babB | outer membrane protein , outer membrane protein - adhesin                                                     | 5                                | 0                                |                                |
| 936               | HP0900            | JHP0837         | hypB         | hydrogenase expression/formation protein                                                                      | -1                               |                                  |                                |
| 942               | HP0906            | JHP0842         |              |                                                                                                               | 1                                |                                  |                                |
| 943               | HP0907            | JHP0843         | flgD         | hook assembly protein, flagella , putative FLAGELLAR BIOSYNTHESIS PROTEIN                                     | -0.5                             |                                  |                                |
| 944               | HP0908            | JHP0844         | flgE         | flagellar hook , putative FLAGELLAR BASAL-BODY/ROD/HOOKPROTEIN                                                | -10.5                            | 2                                | D                              |
| 945               | HP0909            | JHP0845         | -            | Non-functional type II restriction endonuclease                                                               |                                  | -0.5                             |                                |
| 946               | HP0910            | JHP0846         | HINDII M     | adenine specific DNA methyltransferase , TYPE II DNA MODIFICATION ENZYME (METHYLTRANSFERASE)                  |                                  | -0.5                             |                                |
| 947               | HP0911            | JHP0847         | rep          | rep helicase, single-stranded DNA-dependent ATPase , putative ATP-DEPENDENT HELICASE                          |                                  | 2                                |                                |
| 948               | HP0912            | JHP0848         | omp20 , hopC | outer membrane protein , Outer membrane protein/porin                                                         | 3                                | 0.5                              |                                |
| 949               | HP0913            | JHP0849         | omp21 , hopB | outer membrane protein , Outer membrane protein/porin                                                         |                                  | 5.5                              |                                |
| 950               | HP0914            | JHP0850         |              | putative Outer membrane protein                                                                               | -2                               | -3.5                             | B                              |
| 951               | HP0915            | JHP0851         | frpB, frpB_2 | iron-regulated outer membrane protein , putative IRON-REGULATED OUTER MEMBRANE PROTEIN                        | -6                               | -0.5                             | D                              |
| 952               | HP0916            | JHP0851         | frpB         | iron-regulated outer membrane protein                                                                         | -3.5                             |                                  | M                              |
| 953               | HP0917            | N/A             |              |                                                                                                               |                                  | -0.5                             |                                |
| 958               | HP0922            | JHP0856         |              | toxin-like outer membrane protein, putative vacuolating cytotoxin (VacA) paralog                              | -1                               |                                  |                                |

Supplemental Table 4

| Pseudo Gene Order | 26695 Gene Number | J99 Gene Number | Gene Name    | Gene Description                                                                                     | NSH57 Screen Totals <sup>a</sup> | NSH79 Screen Totals <sup>a</sup> | Candidate Mutants <sup>b</sup> |
|-------------------|-------------------|-----------------|--------------|------------------------------------------------------------------------------------------------------|----------------------------------|----------------------------------|--------------------------------|
| 959               | HP0923            | JHP0857         | omp22        | outer membrane protein , putative Outer membrane protein                                             | -1                               |                                  |                                |
| 960               | HP0924            | JHP0858         | dmpl         | 4-oxalocrotonate tautomerase                                                                         | 1.5                              |                                  |                                |
| 961               | HP0925            | JHP0859         | recR         | recombinational DNA repair protein , RECOMBINATION PROTEIN                                           | 1.5                              |                                  |                                |
| 972               | N/A               | JHP0870         |              | putative outer membrane protein                                                                      | 1                                | 3.5                              |                                |
| 973               | HP0936            | JHP0871         | proP         | proline/betaine transporter                                                                          | -0.5                             | 1                                |                                |
| 974               | HP0937            | JHP0872         |              |                                                                                                      | -3.5                             |                                  | M                              |
| 975               | HP0938            | JHP0873         |              |                                                                                                      | 1                                | 3                                |                                |
| 976               | HP0939            | JHP0874         | yckJ         | amino acid ABC transporter, permease protein , putative AMINO ACID ABC TRANSPORTER, PERMEASE PROTEIN |                                  | 1                                |                                |
| 980               | HP0943            | JHP0878         | dadA         | D-amino acid dehydrogenase                                                                           | 1                                |                                  |                                |
| 983               | HP0946            | JHP0880         |              | conserved hypothetical integral membrane protein                                                     |                                  | 5                                |                                |
| 991               | HP0954            | JHP0888         |              | oxygen-insensitive NAD(P)H nitroreductase, putative aldehyde dehydrogenase                           |                                  | 3.5                              |                                |
| 992               | HP0955            | JHP0889         | lgt          | prolipoprotein diacylglyceryl transferase , putative PROLIPOPROTEIN DIACYLGLYCERYL TRANSFERASE       |                                  | 3.5                              |                                |
| 998               | HP0961            | JHP0895         | gpsA         | glycerol-3-phosphate dehydrogenase, NAD(P)+ dependent, GLYCEROL-3-PHOSPHATE DEHYDROGENASE (NAD+)     |                                  | -4                               | M                              |
| 999               | HP0962            | N/A             | acpP         | acyl carrier protein                                                                                 |                                  | -3.5                             | M                              |
| 1000              | N/A               | JHP0896         |              |                                                                                                      |                                  | -3                               | M                              |
| 1001              | HP0963            | JHP0897         |              |                                                                                                      |                                  | -2                               | M                              |
| 1006              | HP0968            | JHP0902         |              |                                                                                                      |                                  | -0.5                             |                                |
| 1008              | HP0970            | JHP0904         | nccB, czcB_1 | nickel-cobalt-cadmium resistance protein , putative cation efflux system protein                     | -1                               |                                  |                                |
| 1009              | HP0971            | JHP0905         |              |                                                                                                      | -2                               | -1.5                             | B                              |

Supplemental Table 4

| Pseudo Gene Order | 26695 Gene Number | J99 Gene Number | Gene Name    | Gene Description                                                                 | NSH57 Screen Totals <sup>a</sup> | NSH79 Screen Totals <sup>a</sup> | Candidate Mutants <sup>b</sup> |
|-------------------|-------------------|-----------------|--------------|----------------------------------------------------------------------------------|----------------------------------|----------------------------------|--------------------------------|
| 1010              | HP0972            | JHP0906         | glyS         | glycyl-tRNA synthetase, beta subunit , GLYCYL-TRNA SYNTHETASE BETA CHAIN         |                                  | -3.5                             | M                              |
| 1013              | HP0975            | JHP0909         | gatC         | Glu-tRNA(Gln) amidotransferase, subunit C , GLU-TRNA AMIDOTRANSFERASE, SUBUNIT C | 0                                |                                  |                                |
| 1014              | HP0976            | JHP0910         | bioA         | adenosylmethionine-8-amino-7-oxononanoate aminotransferase                       | 0                                |                                  |                                |
| 1020              | HP0981            | N/A             | xseA         | exonuclease VII-like protein                                                     | 1.5                              |                                  |                                |
| 1021              | HP0982            | N/A             |              |                                                                                  | 0                                |                                  |                                |
| 1022              | HP0983            | JHP0915         |              | conserved hypothetical integral membrane protein                                 | -0.5                             |                                  |                                |
| 1024              | N/A               | JHP0917         | virB4_2      | DNA transfer protein                                                             | -8                               |                                  | M                              |
| 1036              | N/A               | JHP0929         |              |                                                                                  |                                  | 13.5                             |                                |
| 1038              | N/A               | JHP0931         | topA_3       | topoisomerase I                                                                  |                                  | 8                                |                                |
| 1048              | HP0987            | N/A             |              |                                                                                  | 1                                |                                  |                                |
| 1049              | HP0988            | N/A             | tnpA         | IS605 transposase                                                                | -3                               |                                  | M                              |
| 1050              | HP0989            | N/A             | tnpB         | IS605 transposase                                                                | -6                               |                                  | M                              |
| 1061              | N/A               | JHP0945         |              |                                                                                  | 1                                |                                  |                                |
| 1068              | HP0997            | N/A             | tnpB         | IS605 transposase                                                                | -6                               |                                  | M                              |
| 1069              | HP0998            | N/A             | tnpA         | IS605 transposase                                                                | -1                               |                                  |                                |
| 1070              | HP0999            | N/A             |              |                                                                                  | -0.5                             |                                  |                                |
| 1071              | HP1000            | N/A             |              | PARA protein                                                                     | -0.5                             | 5                                |                                |
| 1075              | HP1004            | N/A             |              |                                                                                  |                                  | 10                               |                                |
| 1076              | HP1005            | N/A             |              |                                                                                  |                                  | 1                                |                                |
| 1077              | HP1006            | N/A             | traG         | conjugal transfer protein                                                        | 1                                | 3                                |                                |
| 1080              | HP1009            | N/A             |              | site-specific recombinase                                                        | -1                               |                                  |                                |
| 1081              | N/A               | JHP0414         | hsdS_1a      | TYPE I RESTRICTION ENZYME (SPECIFICITY SUBUNIT)                                  | 5                                |                                  |                                |
| 1084              | HP1012            | JHP0411         | pqqE         | protease , putative ZINC PROTEASE                                                |                                  | 0.5                              |                                |
| 1086              | HP1014            | JHP0409         | hdhA         | 7-alpha-hydroxysteroid dehydrogenase , putative Short chain dehydrogenase        | 1                                | 0.5                              |                                |
| 1091              | HP1019            | JHP0405         | htrA         | serine protease , PROTEASE DO                                                    |                                  | 0.5                              |                                |
| 1094              | HP1022            | JHP0402         | -            | Predicted 5'-3' exonuclease                                                      | 1                                | -5                               | D                              |
| 1095              | HP1023            | JHP0401         |              |                                                                                  | 2                                | 0                                |                                |
| 1096              | HP1024            | JHP0400         | CbpA, dnaJ_1 | co-chaperone-curved DNA binding protein A , putative co-chaperone with DnaK      |                                  | 3                                |                                |

Supplemental Table 4

| Pseudo Gene Order | 26695 Gene Number | J99 Gene Number | Gene Name | Gene Description                                                                              | NSH57 Screen Totals <sup>a</sup> | NSH79 Screen Totals <sup>a</sup> | Candidate Mutants <sup>b</sup> |
|-------------------|-------------------|-----------------|-----------|-----------------------------------------------------------------------------------------------|----------------------------------|----------------------------------|--------------------------------|
| 1097              | HP1025            | JHP0399         | hspR      | putative heat shock protein , putative TRANSCRIPTIONAL REGULATOR                              |                                  | 2                                |                                |
| 1098              | HP1026            | JHP0398         |           | conserved hypothetical helicase-like protein                                                  | -0.5                             |                                  |                                |
| 1099              | HP1027            | JHP0397         | fur       | ferric uptake regulation protein                                                              | -0.5                             | -6.5                             | D                              |
| 1100              | HP1028            | JHP0396         |           |                                                                                               | 0                                | -10                              | D                              |
| 1101              | HP1029            | JHP0395         |           |                                                                                               | -1.5                             | -3.5                             | B                              |
| 1102              | HP1030            | JHP0394         | fliY      | fliY protein , FLAGELLAR MOTOR SWITCH PROTEIN                                                 | -1.5                             | -5.5                             | B                              |
| 1103              | HP1031            | JHP0393         | fliM      | flagellar motor switch protein                                                                | -1                               | -1.5                             | D                              |
| 1104              | HP1032            | JHP0392         | fliA      | alternative transcription initiation factor, sigma-F , RNA POLYMERASE SIGMA FACTOR (sigma 28) |                                  | 1.5                              |                                |
| 1106              | HP1034            | JHP0390         | ylxH      | ATP-binding protein                                                                           |                                  | -2.5                             | M                              |
| 1107              | HP1035            | JHP0389         | flhF      | flagellar biosynthesis protein , putative FLAGELLAR BIOSYNTHESIS PROTEIN                      | 1                                | -2.5                             | D                              |
| 1109              | HP1037            | JHP0387         | pepQ      | conserved hypothetical protein, putative proline peptidase                                    | -1                               |                                  |                                |
| 1113              | HP1041            | JHP0383         | flhA      | flagellar biosynthesis protein                                                                | 2                                |                                  |                                |
| 1114              | HP1042            | JHP0382         |           |                                                                                               | -3                               |                                  | M                              |
| 1115              | HP1043            | JHP0381         |           | response regulator, putative TRANSCRIPTIONAL REGULATOR                                        | -3                               |                                  | M                              |
| 1116              | HP1044            | JHP0380         |           | conserved hypothetical integral membrane protein                                              | -2                               |                                  | M                              |
| 1117              | HP1045            | N/A             | acoE      | acetyl-CoA synthetase                                                                         | 0.5                              |                                  |                                |
| 1118              | HP1046            | JHP0379         |           | conserved hypothetical protein                                                                | -3                               |                                  | M                              |
| 1125              | HP1053            | JHP0372         | minC      | Predicted septum site-directing protein                                                       | 0.5                              |                                  |                                |
| 1126              | HP1054            | JHP0371         |           |                                                                                               | 0.5                              | 4                                |                                |
| 1128              | HP1056            | JHP0369         |           |                                                                                               | 1                                | 3                                |                                |
| 1129              | HP1057            | JHP0368         |           |                                                                                               |                                  | -4.5                             | M                              |
| 1130              | HP1058            | JHP0367         | panB      | 3-methyl-2-oxobutanoate hydroxymethyltransferase                                              |                                  | -4.5                             | M                              |

Supplemental Table 4

| Pseudo Gene Order | 26695 Gene Number | J99 Gene Number | Gene Name    | Gene Description                                                             | NSH57 Screen Totals <sup>a</sup> | NSH79 Screen Totals <sup>a</sup> | Candidate Mutants <sup>b</sup> |
|-------------------|-------------------|-----------------|--------------|------------------------------------------------------------------------------|----------------------------------|----------------------------------|--------------------------------|
| 1137              | HP1065            | JHP0360         |              |                                                                              | -1.5                             |                                  | M                              |
| 1138              | HP1066            | JHP0359         |              | conserved hypothetical protein, putative Outer membrane protein              | -1.5                             | 0                                | D                              |
| 1143              | HP1071            | JHP0354         | pssA         | phosphatidylserine synthase                                                  |                                  | 1.5                              |                                |
| 1144              | HP1072            | JHP0353         | copA         | copper-transporting ATPase, P-type , COPPER-TRANSPORTING P-TYPE ATPASE       |                                  | 2.5                              |                                |
| 1145              | HP1073            | JHP0352         | copP         | copper ion binding protein , copper-associated protein                       |                                  | 0.5                              |                                |
| 1147              | HP1075            | JHP0350         |              | conserved hypothetical secreted protein                                      |                                  | -4                               | M                              |
| 1148              | HP1076            | JHP0349         |              |                                                                              |                                  | -4.5                             | M                              |
| 1149              | HP1077            | JHP0348         | nixA         | nickel transport protein , HIGH-AFFINITY NICKEL-TRANSPORT PROTEIN            |                                  | -8.5                             | M                              |
| 1152              | HP1080            | JHP0345         |              | conserved hypothetical integral membrane protein                             |                                  | -1.5                             | M                              |
| 1153              | HP1081            | JHP0344         |              |                                                                              |                                  | -3                               | M                              |
| 1155              | HP1083            | JHP0342         |              | putative Outer membrane protein                                              | 1                                |                                  |                                |
| 1156              | HP1084            | JHP0341         | pyrB         | aspartate transcarbamoylase , ASPARTATE CARBAMOYLTRANSFERASE CATALYTIC CHAIN | 1                                |                                  |                                |
| 1162              | HP1090            | JHP0335         | ftsK         | cell division protein , septum formation protein                             | -0.5                             | 1                                |                                |
| 1163              | HP1091            | JHP0334         | kgtP         | alpha-ketoglutarate permease                                                 | -7                               | -3                               | B                              |
| 1164              | HP1092            | JHP0333         | flgG, flgG_1 | flagellar basal-body rod protein                                             | -10.5                            |                                  | M                              |
| 1165              | N/A               | JHP0332         |              |                                                                              | -4                               |                                  | M                              |
| 1166              | HP1093            | N/A             |              |                                                                              | 1                                |                                  |                                |
| 1167              | HP1094            | N/A             |              |                                                                              | -0.5                             |                                  |                                |
| 1168              | HP1095            | N/A             | tnpB         | IS605 transposase                                                            | 1.5                              | 1.5                              |                                |
| 1169              | HP1096            | N/A             | tnpA         | IS605 transposase                                                            | -2.5                             | 1                                | D                              |
| 1170              | HP1097            | N/A             |              |                                                                              |                                  | 0.5                              |                                |
| 1171              | HP1098            | JHP1024         | hcpC         | Cysteine-rich protein C                                                      | 11                               | 19.5                             |                                |
| 1172              | HP1099            | JHP1025         | eda          | 2-keto-3-deoxy-6-phosphogluconate aldolase                                   | 8                                | 5.5                              |                                |

Supplemental Table 4

| Pseudo Gene Order | 26695 Gene Number | J99 Gene Number | Gene Name   | Gene Description                                                                       | NSH57 Screen Totals <sup>a</sup> | NSH79 Screen Totals <sup>a</sup> | Candidate Mutants <sup>b</sup> |
|-------------------|-------------------|-----------------|-------------|----------------------------------------------------------------------------------------|----------------------------------|----------------------------------|--------------------------------|
| 1173              | HP1100            | JHP1026         | edd         | 6-phosphogluconate dehydratase, PHOSPHOGLUCONATE DEHYDRATASE                           | 8                                | 1.5                              |                                |
| 1174              | HP1101            | JHP1027         | g6pD, zwf   | glucose-6-phosphate dehydrogenase , GLUCOSE-6-PHOSPHATE 1- DEHYDROGENASE               | 1.5                              | 0                                |                                |
| 1175              | HP1102            | JHP1028         | pgl         | Predicted 6-phosphogluconolactonase (previously annotated as a putative dehydrogenase) |                                  | 0                                |                                |
| 1176              | HP1103            | JHP1029         | glk         | glucokinase                                                                            | 0.5                              | 0.5                              |                                |
| 1177              | HP1104            | JHP1030         | cad         | cinnamyl-alcohol dehydrogenase ELI3 2 , ZINC-DEPENDENT ALCOHOL DEHYDROGENASE           | 0.5                              | 0.5                              |                                |
| 1178              | HP1105            | JHP1031         |             | LPS biosynthesis protein, putative lipopolysaccharide biosynthesis protein             | -2                               |                                  | M                              |
| 1181              | HP1107            | JHP1034         | omp23       | outer membrane protein , putative Outer membrane protein                               | 2                                |                                  |                                |
| 1187              | HP1113            | JHP1040         | omp24       | outer membrane protein , putative Outer membrane protein                               | 1                                |                                  |                                |
| 1188              | HP1114            | JHP1041         | uvrB        | excinuclease ABC subunit B                                                             | 2.5                              | 2                                |                                |
| 1189              | HP1115            | JHP1042         |             |                                                                                        | 1                                |                                  |                                |
| 1191              | HP1116            | JHP1044         |             |                                                                                        | -0.5                             | 1                                |                                |
| 1192              | HP1117            | JHP1045         | hcpX        | Cystein-rich protein X                                                                 | 1.5                              |                                  |                                |
| 1193              | HP1118            | JHP1046         | ggt         | gamma-glutamyltranspeptidase                                                           | -1                               | 2                                |                                |
| 1194              | HP1119            | JHP1047         | flgK        | flagellar hook-associated protein 1 (HAP1)                                             | -2.5                             |                                  | M                              |
| 1222              | HP1146            | JHP1073         |             |                                                                                        |                                  | 1                                |                                |
| 1223              | HP1147            | JHP1074         | rpl19, rplS | ribosomal protein L19 , 50S RIBOSOMAL PROTEIN L19.                                     |                                  | 1                                |                                |
| 1229              | HP1153            | JHP1080         | valS        | valyl-tRNA synthetase                                                                  | 1                                |                                  |                                |
| 1230              | HP1154            | JHP1081         |             |                                                                                        |                                  | -0.5                             |                                |
| 1232              | HP1156            | JHP1083         | omp25       | outer membrane protein , putative Outer membrane protein                               |                                  | 0.5                              |                                |
| 1233              | HP1157            | JHP1084         | omp26       | outer membrane protein , putative Outer membrane protein                               |                                  | -3.5                             | M                              |

Supplemental Table 4

| Pseudo Gene Order | 26695 Gene Number | J99 Gene Number | Gene Name    | Gene Description                                                                                                         | NSH57 Screen Totals <sup>a</sup> | NSH79 Screen Totals <sup>a</sup> | Candidate Mutants <sup>b</sup> |
|-------------------|-------------------|-----------------|--------------|--------------------------------------------------------------------------------------------------------------------------|----------------------------------|----------------------------------|--------------------------------|
| 1234              | HP1158            | JHP1085         | proC         | pyrroline-5-carboxylate reductase , putative PYRROLINE-5-CARBOXYLATE REDUCTASE                                           |                                  | -7                               | M                              |
| 1235              | HP1159            | JHP1086         | fic          | cell filamentation protein , putative cAMP-induced cell filamentation protein                                            | -2                               | 5                                | D                              |
| 1236              | HP1160            | JHP1087         |              | conserved hypothetical protein                                                                                           | -2                               |                                  | M                              |
| 1237              | HP1161            | JHP1088         | fldA         | flavodoxin                                                                                                               | 1                                |                                  |                                |
| 1240              | HP1164            | JHP1091         | trxB, trxB_2 | thioredoxin reductase , putative THIOREDOXIN REDUCTASE                                                                   | -1.5                             |                                  | M                              |
| 1241              | HP1165            | JHP1092         |              | tetracycline resistance protein tetA(P), putative                                                                        | 1.5                              |                                  |                                |
| 1242              | HP1166            | JHP1093         | pgi          | glucose-6-phosphate isomerase                                                                                            | 1                                |                                  |                                |
| 1243              | HP1167            | JHP1094         |              | putative Outer membrane protein                                                                                          | -2                               |                                  | M                              |
| 1244              | HP1168            | JHP1095         | cstA         | carbon starvation protein                                                                                                | 3                                | -2                               | D                              |
| 1245              | HP1169            | JHP1096         | glnP         | glutamine ABC transporter, permease protein , AMINO ACID ABC TRANSPORTER, PERMEASE PROTEIN                               | 0.5                              | 0                                |                                |
| 1246              | HP1170            | JHP1097         | glnP         | glutamine ABC transporter, permease protein , AMINO ACID ABC TRANSPORTER, PERMEASE PROTEIN                               | -0.5                             | 2.5                              |                                |
| 1247              | HP1171            | JHP1098         | glnQ         | glutamine ABC transporter, ATP-binding protein , AMINO ACID ABC TRANSPORTER, ATP-BINDING PROTEIN                         |                                  | 0.5                              |                                |
| 1248              | HP1172            | JHP1099         | glnH         | glutamine ABC transporter, periplasmic glutamine-binding protein , AMINO ACID ABC TRANSPORTER, BINDING PROTEIN PRECURSOR | 2.5                              | 1                                |                                |
| 1249              | HP1173            | JHP1100         |              |                                                                                                                          | 0.5                              | 1.5                              |                                |
| 1250              | HP1174            | JHP1101         | gluP         | glucose/galactose transporter                                                                                            | 0.5                              | 3                                |                                |
| 1251              | HP1175            | JHP1102         |              | conserved hypothetical integral membrane protein                                                                         | 0.5                              | 0.5                              |                                |
| 1253              | HP1177            | JHP1103         | omp27        | outer membrane protein , putative Outer membrane function                                                                |                                  | 1                                |                                |



Supplemental Table 4

| Pseudo Gene Order | 26695 Gene Number | J99 Gene Number | Gene Name     | Gene Description                                                                                    | NSH57 Screen Totals <sup>a</sup> | NSH79 Screen Totals <sup>a</sup> | Candidate Mutants <sup>b</sup> |
|-------------------|-------------------|-----------------|---------------|-----------------------------------------------------------------------------------------------------|----------------------------------|----------------------------------|--------------------------------|
| 1254              | HP1178            | JHP1104         | deoD          | purine-nucleoside phosphorylase ,<br>PURINE NUCLEOSIDE<br>PHOSPHORYLASE                             |                                  | -0.5                             |                                |
| 1255              | HP1179            | JHP1105         | deoB          | phosphopentomutase                                                                                  |                                  | 0.5                              |                                |
| 1256              | HP1180            | JHP1106         | nupC          | pyrimidine nucleoside transport<br>protein , putative nucleoside<br>transporter                     |                                  | 0.5                              |                                |
| 1257              | HP1181            | JHP1107         |               | multidrug-efflux transporter, putative<br>transporter                                               |                                  | 1.5                              |                                |
| 1258              | HP1182            | JHP1108         |               | conserved hypothetical protein                                                                      |                                  | 2.5                              |                                |
| 1259              | HP1183            | JHP1109         | napA          | NA <sup>+</sup> /H <sup>+</sup> antiporter , putative NA <sup>+</sup> /H <sup>+</sup><br>ANTIPORTER |                                  | 2                                |                                |
| 1260              | HP1184            | JHP1110         |               | conserved hypothetical integral<br>membrane protein                                                 | 0.5                              |                                  |                                |
| 1261              | HP1185            | JHP1111         | sotB          | Predicted sugar efflux transporter                                                                  | 6.5                              | 5.5                              |                                |
| 1262              | HP1186            | JHP1112         |               | carbonic anhydrase                                                                                  | 6                                | 1.5                              |                                |
| 1263              | HP1187            | JHP1113         |               |                                                                                                     | 1                                | -2.5                             | D                              |
| 1264              | HP1188            | N/A             |               |                                                                                                     | 13                               | -7                               | D                              |
| 1265              | HP1189            | JHP1114         | asd           | aspartate-semialdehyde<br>dehydrogenase                                                             | 0.5                              | -5                               | D                              |
| 1266              | HP1190            | JHP1115         | hisS          | histidyl-tRNA synthetase                                                                            | 1.5                              | 0                                |                                |
| 1267              | HP1191            | JHP1116         | rfaF,<br>waaF | ADP-heptose-lps heptosyltransferase<br>II , ADP-HEPTOSE--LPS<br>HEPTOSYLTRANSFERASE II              |                                  | 0.5                              |                                |
| 1269              | HP1193            | N/A             |               | aldo-keto reductase, putative                                                                       | 0                                |                                  |                                |
| 1270              | HP1194            | N/A             |               |                                                                                                     | -2.5                             |                                  | M                              |
| 1271              | HP1195            | JHP1118         | fusA          | translation elongation factor EF-G ,<br>ELONGATION FACTOR G (EF-G)                                  | -3.5                             |                                  | M                              |
| 1281              | HP1205            | JHP1128         | tufB,<br>tufA | translation elongation factor EF-Tu ,<br>ELONGATION FACTOR TU (EF-TU)                               | 1                                |                                  |                                |
| 1285              | N/A               | JHP1132         |               |                                                                                                     | 0.5                              |                                  |                                |
| 1298              | HP1221            | JHP1142         | uppS          | Predicted undecaprenyl<br>pyrophosphate synthase                                                    | 1                                | 2.5                              |                                |
| 1301              | HP1224            | JHP1145         | hemD          | uroporphyrinogen III cosynthase ,<br>putative UROPORPHYRINOGEN-III<br>SYNTHASE                      |                                  | 0.5                              |                                |
| 1302              | HP1225            | JHP1146         | crcB          | Predicted CrcB integral membrane<br>protein                                                         |                                  | 3                                |                                |

Supplemental Table 4

| Pseudo Gene Order | 26695 Gene Number | J99 Gene Number | Gene Name    | Gene Description                                                                                       | NSH57 Screen Totals <sup>a</sup> | NSH79 Screen Totals <sup>a</sup> | Candidate Mutants <sup>b</sup> |
|-------------------|-------------------|-----------------|--------------|--------------------------------------------------------------------------------------------------------|----------------------------------|----------------------------------|--------------------------------|
| 1303              | HP1226            | JHP1147         | hemN, hemN_2 | oxygen-independent coproporphyrinogen III oxidase                                                      | 2                                | 1                                |                                |
| 1310              | HP1233            | JHP1154         |              |                                                                                                        | 0.5                              |                                  |                                |
| 1311              | HP1234            | JHP1155         |              | conserved hypothetical integral membrane protein                                                       | 1.5                              |                                  |                                |
| 1314              | HP1237            | JHP1158         | pyrAa, carA  | carbamoyl-phosphate synthetase , CARBAMOYL-PHOSPHATE SYNTHASE SMALL CHAIN                              | 2                                |                                  |                                |
| 1315              | HP1238            | JHP1159         | amiF         | Formamidase (previously annotated as a aliphatic amidase)                                              | 5                                | -2                               | D                              |
| 1329              | HP1251            | JHP1172         | oppB         | oligopeptide ABC transporter, permease protein , putative Peptide ABC transporter, ATP-binding protein | 4                                | -2                               | D                              |
| 1330              | HP1252            | JHP1173         | oppA         | oligopeptide ABC transporter, periplasmic oligopeptide-binding protein                                 |                                  | 0                                |                                |
| 1336              | HP1258            | JHP1179         |              | conserved hypothetical mitochondrial protein 4                                                         |                                  | 0.5                              |                                |
| 1337              | HP1259            | JHP1180         |              | conserved hypothetical protein                                                                         |                                  | 5.5                              |                                |
| 1353              | HP1275            | JHP1196         | algC         | phosphomannomutase , phosphohexosemutase                                                               | 0.5                              |                                  |                                |
| 1354              | HP1276            | JHP1197         |              |                                                                                                        | 0.5                              |                                  |                                |
| 1355              | HP1277            | JHP1198         | trpA         | tryptophan synthase, alpha subunit , TRYPTOPHAN SYNTHASE ALPHA CHAIN                                   | -1.5                             |                                  | M                              |
| 1356              | HP1278            | JHP1199         | trpB         | tryptophan synthase, beta subunit , TRYPTOPHAN SYNTHASE BETA CHAIN                                     | -1.5                             |                                  | M                              |
| 1357              | HP1279            | JHP1200         | trpC         | anthranilate isomerase , INDOLE-3-GLYCEROL PHOSPHATE SYNTHASE                                          | 0                                | 0.5                              |                                |
| 1359              | HP1281            | JHP1202         | trpD, trpG   | anthranilate synthase component II                                                                     | -1                               | 0                                |                                |
| 1360              | HP1282            | JHP1203         | trpE         | anthranilate synthase component I                                                                      | -3                               |                                  | M                              |
| 1361              | HP1283            | N/A             |              |                                                                                                        | -1                               |                                  |                                |
| 1362              | HP1284            | JHP1204         |              | conserved hypothetical protein                                                                         | -7                               | -5                               | B                              |
| 1363              | HP1285            | JHP1205         | aphA         | Predicted acid phosphatase lipoprotein                                                                 | -6.5                             |                                  | M                              |
| 1364              | HP1286            | JHP1206         |              | conserved hypothetical secreted protein                                                                | -0.5                             | -8                               | D                              |

Supplemental Table 4

| Pseudo Gene Order | 26695 Gene Number | J99 Gene Number | Gene Name           | Gene Description                                                                                      | NSH57 Screen Totals <sup>a</sup> | NSH79 Screen Totals <sup>a</sup> | Candidate Mutants <sup>b</sup> |
|-------------------|-------------------|-----------------|---------------------|-------------------------------------------------------------------------------------------------------|----------------------------------|----------------------------------|--------------------------------|
| 1365              | HP1287            | JHP1207         | tenA                | transcriptional regulator , putative<br>TRANSCRIPTIONAL REGULATOR                                     | -2                               | -0.5                             | D                              |
| 1372              | HP1294            | JHP1214         | rps4,<br>rpsD       | ribosomal protein S4 , 30S<br>RIBOSOMAL PROTEIN S4                                                    | 0.5                              |                                  |                                |
| 1373              | HP1295            | JHP1215         | rps11,<br>rpsK      | ribosomal protein S11 , 30S<br>RIBOSOMAL PROTEIN S11                                                  | 0.5                              |                                  |                                |
| 1376              | HP1298            | JHP1218         | infA                | translation initiation factor EF-1 ,<br>TRANSLATION INITIATION FACTOR<br>IF-1                         | 1                                |                                  |                                |
| 1379              | HP1301            | JHP1221         | rpl15,<br>rplO      | ribosomal protein L15 , 50S<br>RIBOSOMAL PROTEIN L15                                                  | 3                                | 0.5                              |                                |
| 1382              | HP1304            | JHP1224         | rpl6,<br>rplF       | ribosomal protein L6 , 50S<br>RIBOSOMAL PROTEIN L6                                                    |                                  | 0.5                              |                                |
| 1389              | HP1311            | JHP1231         | rpL29,<br>rpmC      | ribosomal protein L29 , 50S<br>RIBOSOMAL PROTEIN L29                                                  | 1                                |                                  |                                |
| 1401              | HP1323            | JHP1243         | rnhB                | ribonuclease HII                                                                                      |                                  | 6                                |                                |
| 1405              | HP1327            | JHP1247         |                     |                                                                                                       | 4.5                              |                                  |                                |
| 1406              | HP1328            | JHP1248         | czcA,<br>czcB_<br>2 | cation efflux system protein                                                                          | -0.5                             | -14                              | D                              |
| 1407              | HP1329            | JHP1249         | czcA,<br>czcA_<br>2 | cation efflux system protein                                                                          |                                  | -3                               | M                              |
| 1410              | HP1332            | JHP1252         | dnaJ,<br>dnaJ_<br>2 | co-chaperone and heat shock protein<br>, co-chaperone with DnaK                                       | -0.5                             |                                  |                                |
| 1411              | HP1333            | JHP1253         |                     |                                                                                                       | -1                               | 0                                |                                |
| 1419              | HP1341            | JHP1260         | tonB,<br>tonB_<br>2 | siderophore-mediated iron transport<br>protein                                                        | 0                                | 0                                |                                |
| 1420              | HP1342            | JHP1261         | omp29               | outer membrane protein , putative<br>Outer membrane protein                                           | 6                                | 6                                |                                |
| 1421              | HP1343            | JHP1262         |                     | conserved hypothetical integral<br>membrane protein                                                   | -1                               |                                  |                                |
| 1423              | HP1345            | JHP1264         | pgk                 | phosphoglycerate kinase                                                                               | 2                                |                                  |                                |
| 1425              | HP1347            | JHP1266         | ung                 | uracil-DNA glycosylase                                                                                |                                  | -12                              | M                              |
| 1430              | HP1352            | JHP1271         | HINFI<br>M          | adenine specific DNA<br>methyltransferase , TYPE II DNA<br>MODIFICATION ENZYME<br>(METHYLTRANSFERASE) | -1                               |                                  |                                |
| 1431              | HP1353            | JHP1272         | -                   | Predicted adenine-specific DNA<br>methylase                                                           | -1                               |                                  |                                |

Supplemental Table 4

| Pseudo Gene Order | 26695 Gene Number | J99 Gene Number | Gene Name      | Gene Description                                                                                             | NSH57 Screen Totals <sup>a</sup> | NSH79 Screen Totals <sup>a</sup> | Candidate Mutants <sup>b</sup> |
|-------------------|-------------------|-----------------|----------------|--------------------------------------------------------------------------------------------------------------|----------------------------------|----------------------------------|--------------------------------|
| 1432              | HP1354            | JHP1272         |                | putative adenine specific DNA methyltransferase                                                              | -1                               |                                  |                                |
| 1439              | HP1361            | JHP1279         | comE 3, comE C | competence locus E , DNA transfer protein                                                                    | 4                                |                                  |                                |
| 1440              | HP1362            | JHP1280         | dnaB           | replicative DNA helicase                                                                                     |                                  | -2                               | M                              |
| 1449              | HP1370            | N/A             | mod            | type III restriction enzyme M protein                                                                        | -1                               | 0.5                              |                                |
| 1451              | HP1372            | JHP1286         | mreC           | rod shape-determining protein                                                                                |                                  | 0.5                              |                                |
| 1453              | HP1374            | JHP1288         | clpX           | ATP-dependent protease ATPase subunit , ATP-DEPENDENT PROTEASE,ATP-BINDING SUBUNIT                           | 0                                | 6                                |                                |
| 1454              | HP1375            | JHP1289         | lpxA           | UDP-N-acetylglucosamine acyltransferase                                                                      | -1                               | 1                                |                                |
| 1455              | HP1376            | JHP1290         | fabZ           | (3R)-hydroxymyristoyl-(acyl carrier protein) dehydratase , HYDROXYMYRISTOYL-ACYL CARRIER PROTEIN DEHYDRATASE |                                  | 0.5                              |                                |
| 1456              | HP1377            | JHP1291         |                |                                                                                                              |                                  | 2.5                              |                                |
| 1460              | HP1381            | N/A             |                |                                                                                                              | 0.5                              | -1                               |                                |
| 1461              | HP1382            | JHP1295         |                | putative ENDONUCLEASE                                                                                        | 1.5                              | -1                               |                                |
| 1462              | N/A               | JHP1296         | mod_1          | putative TYPE III DNA MODIFICATION ENZYME (METHYLTRANSFERASE)                                                | 3                                | 1                                |                                |
| 1463              | N/A               | JHP1297         | res_1          | putative TYPE III RESTRICTION ENZYME                                                                         | 1                                |                                  |                                |
| 1472              | N/A               | JHP1437         | hcpG           | Cysteine-rich protein G                                                                                      | 1                                | -1.5                             | D                              |
| 1473              | HP1391            | JHP1436         |                |                                                                                                              | 8                                | -1.5                             | D                              |
| 1474              | HP1392            | JHP1435         |                | fibronectin/fibrinogen-binding protein                                                                       | -1                               |                                  |                                |
| 1475              | HP1393            | JHP1434         | recN           | DNA repair protein , DNA REPAIR PROTEIN(RECOMBINATION PROTEIN N)                                             | 2                                |                                  |                                |
| 1479              | HP1397            | JHP1430         |                |                                                                                                              | -1                               |                                  |                                |
| 1480              | HP1398            | JHP1428         | ald            | alanine dehydrogenase , L-ALANINE DEHYDROGENASE                                                              |                                  | 4.5                              |                                |
| 1482              | HP1399            | JHP1427         | rocF           | arginase                                                                                                     | -0.5                             | 6                                |                                |

Supplemental Table 4

| Pseudo Gene Order | 26695 Gene Number | J99 Gene Number    | Gene Name    | Gene Description                                                                                  | NSH57 Screen Totals <sup>a</sup> | NSH79 Screen Totals <sup>a</sup> | Candidate Mutants <sup>b</sup> |
|-------------------|-------------------|--------------------|--------------|---------------------------------------------------------------------------------------------------|----------------------------------|----------------------------------|--------------------------------|
| 1483              | HP1400            | JHP1426            | fecA, fecA_3 | iron(III) dicitrate transport protein , putative IRON(III) DICITRATE TRANSPORT PROTEIN            | -3.5                             | -44                              | B                              |
| 1484              | HP1401            | JHP1425            |              | conserved hypothetical protein                                                                    | -5                               | -9.5                             | B                              |
| 1486              | HP1403            | JHP1423            | hsdM, hsdM_3 | type I restriction enzyme M protein , TYPE I RESTRICTION ENZYME (MODIFICATION SUBUNIT)            | 4                                | 1                                |                                |
| 1490              | HP1406            | JHP1298            | bioB         | biotin synthetase                                                                                 |                                  | 1                                |                                |
| 1491              | HP1407            | JHP1299            | rbn          | conserved hypothetical integral membrane protein, putative ribonuclease N                         |                                  | 1                                |                                |
| 1493              | HP1409            | JHP1301<br>JHP1302 |              |                                                                                                   | 5                                | -0.5                             |                                |
| 1494              | HP1410            | JHP1303            |              |                                                                                                   |                                  | -5                               | M                              |
| 1501              | HP1416            | JHP1311            | rfaJ         | lipopolysaccharide 1,2-glucosyltransferase , lipopolysaccharide biosynthesis protein              | -2                               |                                  | M                              |
| 1502              | HP1417            | JHP1312            |              |                                                                                                   | -4                               | -12                              | B                              |
| 1508              | HP1423            | JHP1318            |              | conserved hypothetical protein                                                                    |                                  | 1.5                              |                                |
| 1509              | HP1424            | JHP1319            |              |                                                                                                   | 0                                | -0.5                             |                                |
| 1512              | HP1427            | JHP1320            | hpn          | histidine-rich, metal binding polypeptide , putative histidine-rich metal-binding protein         | 0                                | -1                               |                                |
| 1513              | HP1428            | JHP1325            |              | conserved hypothetical protein                                                                    |                                  | -5                               | M                              |
| 1514              | HP1429            | JHP1324            | kpsF         | polysialic acid capsule expression protein                                                        |                                  | 0.5                              |                                |
| 1516              | HP1431            | JHP1322            | ksgA         | 16S rRNA(adenosine-N6,N6)-dimethyltransferase , DIMETHYLADENOSINE TRANSFERASE                     |                                  | 0.5                              |                                |
| 1517              | HP1432            | JHP1321            |              | histidine and glutamine-rich protein, putative histidine and glutamine-rich metal-binding protein |                                  | 0.5                              |                                |
| 1518              | HP1433            | JHP1326            |              |                                                                                                   | -1                               |                                  |                                |
| 1520              | HP1435            | JHP1328            | PspA, sppA   | protease IV , putative PROTEASE IV                                                                | -1                               |                                  |                                |

Supplemental Table 4

| Pseudo Gene Order | 26695 Gene Number | J99 Gene Number | Gene Name  | Gene Description                                                                        | NSH57 Screen Totals <sup>a</sup> | NSH79 Screen Totals <sup>a</sup> | Candidate Mutants <sup>b</sup> |
|-------------------|-------------------|-----------------|------------|-----------------------------------------------------------------------------------------|----------------------------------|----------------------------------|--------------------------------|
| 1525              | HP1440            | JHP1333         |            |                                                                                         | -2                               |                                  | M                              |
| 1537              | HP1452            | JHP1345         | tdhF, thdF | thiophene and furan oxidizer , putative thiophene/furan oxidation protein               | 0.5                              |                                  |                                |
| 1538              | HP1453            | JHP1346         |            | conserved hypothetical protein, putative Outer membrane protein                         | 1.5                              | -0.5                             |                                |
| 1539              | HP1454            | JHP1347         |            |                                                                                         | 0.5                              | -1                               |                                |
| 1540              | HP1455            | JHP1348         |            |                                                                                         | 0                                | -1                               |                                |
| 1541              | HP1456            | JHP1349         | lpp20      | membrane-associated lipoprotein , conserved lipoprotein                                 | 0                                |                                  |                                |
| 1542              | HP1457            | JHP1350         |            |                                                                                         |                                  | 0.5                              |                                |
| 1543              | HP1458            | JHP1351         |            | thioredoxin, putative THIOREDOXIN                                                       | 1                                | 2                                |                                |
| 1544              | HP1459            | JHP1352         | rluB       | Predicted ribosomal large subunit pseudouridine synthase B                              | 0                                | 1.5                              |                                |
| 1546              | HP1461            | JHP1354         |            | cytochrome c551 peroxidase, putative CYTOCHROME C PEROXIDASE                            | 0.5                              |                                  |                                |
| 1547              | HP1462            | JHP1355         |            | secreted protein involved in flagellar motility, putative motility protein              | 0.5                              |                                  |                                |
| 1551              | HP1466            | JHP1359         | -          | Predicted ABC transport system permease                                                 |                                  | -9                               | M                              |
| 1552              | HP1467            | JHP1360         |            | putative Outer membrane protein                                                         |                                  | -9                               | M                              |
| 1553              | HP1468            | JHP1361         | ilvE       | branched-chain-amino-acid aminotransferase , BRANCHED-CHAIN AMINO ACID AMINOTRANSFERASE |                                  | 0                                |                                |
| 1554              | HP1469            | JHP1362         | omp31      | outer membrane protein , putative Outer membrane protein                                |                                  | 5.5                              |                                |
| 1555              | HP1470            | JHP1363         | polA       | DNA polymerase I                                                                        | -1                               |                                  |                                |
| 1574              | HP1489            | JHP1382         |            | lipase-like protein                                                                     | -1                               | -0.5                             |                                |
| 1575              | HP1490            | JHP1383         | tlyC       | Predicted TlyC-like hemolysin                                                           |                                  | 0.5                              |                                |
| 1580              | HP1495            | JHP1388         | tal        | transaldolase                                                                           |                                  | -0.5                             |                                |
| 1581              | HP1496            | JHP1389         | ctc, rplY  | general stress protein , putative ribosomal protein L25                                 |                                  | -0.5                             |                                |
| 1583              | HP1498            | JHP1391         |            |                                                                                         |                                  | 0                                |                                |
| 1585              | HP1500            | JHP1393         |            |                                                                                         | 1                                | -2                               | D                              |

Supplemental Table 4

| Pseudo Gene Order | 26695 Gene Number | J99 Gene Number | Gene Name    | Gene Description                                                                          | NSH57 Screen Totals <sup>a</sup> | NSH79 Screen Totals <sup>a</sup> | Candidate Mutants <sup>b</sup> |
|-------------------|-------------------|-----------------|--------------|-------------------------------------------------------------------------------------------|----------------------------------|----------------------------------|--------------------------------|
| 1586              | HP1501            | JHP1394         | omp32        | outer membrane protein , putative Outer membrane protein                                  | -1                               | -3                               | D                              |
| 1587              | HP1502            | JHP1395         |              |                                                                                           | -1                               |                                  |                                |
| 1592              | HP1507            | JHP1400         |              | conserved hypothetical ATP-binding protein                                                | -1                               | 0.5                              |                                |
| 1594              | HP1509            | JHP1402         |              | conserved hypothetical integral membrane protein                                          | -1                               | 0.5                              |                                |
| 1596              | HP1511            | JHP1404         |              |                                                                                           | 1                                |                                  |                                |
| 1597              | HP1512            | JHP1405         | frpB, frpB_3 | iron-regulated outer membrane protein , putative IRON-REGULATED OUTER MEMBRANE PROTEIN    | 1                                |                                  |                                |
| 1610              | HP1523            | JHP1412         | recG         | DNA recombinase , ATP-DEPENDENT DNA HELICASE                                              | 1                                |                                  |                                |
| 1612              | HP1525            | JHP1414         |              |                                                                                           |                                  | -4                               | M                              |
| 1613              | HP1526            | JHP1415         | lexA, exoA   | exodeoxyribonuclease                                                                      |                                  | -4                               | M                              |
| 1614              | HP1527            | JHP1416         | comH         | Periplasmic protein essential for natural competence                                      | -1                               | 4.5                              |                                |
| 1615              | HP1528            | N/A             |              |                                                                                           |                                  | 0                                |                                |
| 1616              | HP1529            | JHP1417         | dnaA         | chromosomal replication initiator protein                                                 |                                  | 2                                |                                |
| 1621              | HP1534            | N/A             | tnpB         | IS605 transposase                                                                         | -6                               |                                  | M                              |
| 1622              | HP1535            | N/A             | tnpA         | IS605 transposase                                                                         | -1                               |                                  |                                |
| 1624              | HP1537            | N/A             |              |                                                                                           | 0                                |                                  |                                |
| 1627              | HP1538            | JHP1461         | petC         | Ubiquinol cytochrome c oxidoreductase, cytochrome c1 subunit                              | 0.5                              |                                  |                                |
| 1630              | HP1541            | JHP1458         | trcF, mfd    | transcription-repair coupling factor                                                      | -1                               | -2                               | D                              |
| 1631              | HP1542            | JHP1457         |              |                                                                                           | -1                               |                                  |                                |
| 1632              | HP1543            | JHP1456         | tagE         | toxR-activated gene                                                                       |                                  | 1                                |                                |
| 1633              | HP1544            | JHP1455         | tagE         | toxR-activated gene                                                                       |                                  | 0.5                              |                                |
| 1634              | HP1545            | JHP1454         | folC         | folylpolyglutamate synthase                                                               |                                  | 4.5                              |                                |
| 1635              | HP1546            | JHP1453         |              |                                                                                           |                                  | 2.5                              |                                |
| 1648              | HP1559            | JHP1467         | flgB         | flagellar basal-body rod protein (proximal rod protein), FLAGELLAR BASAL-BODY ROD PROTEIN | 5.5                              | -1                               |                                |

Supplemental Table 4

| Pseudo Gene Order | 26695 Gene Number | J99 Gene Number | Gene Name    | Gene Description                                                                                       | NSH57 Screen Totals <sup>a</sup> | NSH79 Screen Totals <sup>a</sup> | Candidate Mutants <sup>b</sup> |
|-------------------|-------------------|-----------------|--------------|--------------------------------------------------------------------------------------------------------|----------------------------------|----------------------------------|--------------------------------|
| 1649              | HP1560            | JHP1468         | ftsW, rodA_2 | cell division protein , putative ROD SHAPE-DETERMINING PROTEIN                                         | -0.5                             | 2                                |                                |
| 1650              | HP1561            | JHP1469         | ceuE         | iron (III) ABC transporter, periplasmic iron-binding protein                                           |                                  | 5.5                              |                                |
| 1651              | HP1562            | JHP1470         | ceuE         | iron (III) ABC transporter, periplasmic iron-binding protein                                           | 1.5                              | 1                                |                                |
| 1652              | HP1563            | JHP1471         | tsaA         | alkyl hydroperoxide reductase , putative peroxidase                                                    | 0.5                              | -1                               |                                |
| 1653              | HP1564            | JHP1472         |              | outer membrane protein, putative Outer membrane protein                                                | 0                                | -0.5                             |                                |
| 1654              | HP1565            | JHP1473         | pbp2         | penicillin-binding protein 2 , PENICILLIN-BINDING PROTEIN                                              | 2                                |                                  |                                |
| 1669              | HP1580            | JHP1487         |              |                                                                                                        | 1                                |                                  |                                |
| 1670              | HP1581            | JHP1488         | llm, wecA    | methicillin resistance protein , putative UNDECAPRENYL-PHOSPHATE-ALPHA-N-ACETYLGLUCOSAMINYLTRANSFERASE | -5                               |                                  | M                              |
| 1671              | HP1582            | JHP1489         | pdxJ         | pyridoxal phosphate biosynthetic protein J , PYRIDOXAL PHOSPHATE SYNTHETASE                            | -1                               |                                  |                                |
| 1673              | HP1584            | JHP1491         | gcp, ydiE    | sialoglycoprotease , putative O-SIALOGLYCOPROTEIN ENDOPEPTIDASE                                        | -2                               |                                  | M                              |
| 1674              | HP1585            | JHP1492         | flgG, flgG_2 | flagellar basal-body rod protein , FLAGELLAR BASAL-BODY ROD PROTEIN (DISTAL ROD PROTEIN)               | -8                               |                                  | M                              |
| 1675              | HP1586            | N/A             |              |                                                                                                        | 0                                |                                  |                                |
| 1676              | HP1587            | JHP1493         |              | conserved hypothetical protein                                                                         | -2.5                             |                                  | M                              |
| 1677              | HP1588            | JHP1494         |              | conserved hypothetical protein                                                                         | 0.5                              |                                  |                                |
| 1679              | HP1589            | N/A             |              |                                                                                                        | 2                                |                                  |                                |
| 1680              | HP1590            | N/A             |              |                                                                                                        | -1                               |                                  |                                |

<sup>a</sup>Summed number of transposon insertions in the indicated genes detected in mice from all 25 pools. Insertions were given a positive value if they had no phenotype and a negative value if they had a phenotype (see Material and Methods)

<sup>b</sup>M- candidate mutant in one strain background, B- candidate mutant in both strain backgrounds, D- discordant data in the two strain backgrounds
